# Supplementary material
Source: PubMed Central journal article supplement (PMC4957192)
Supplement: jcsm.12.8.1143a.pdf [file jcsm.12.8.1143a.pdf]

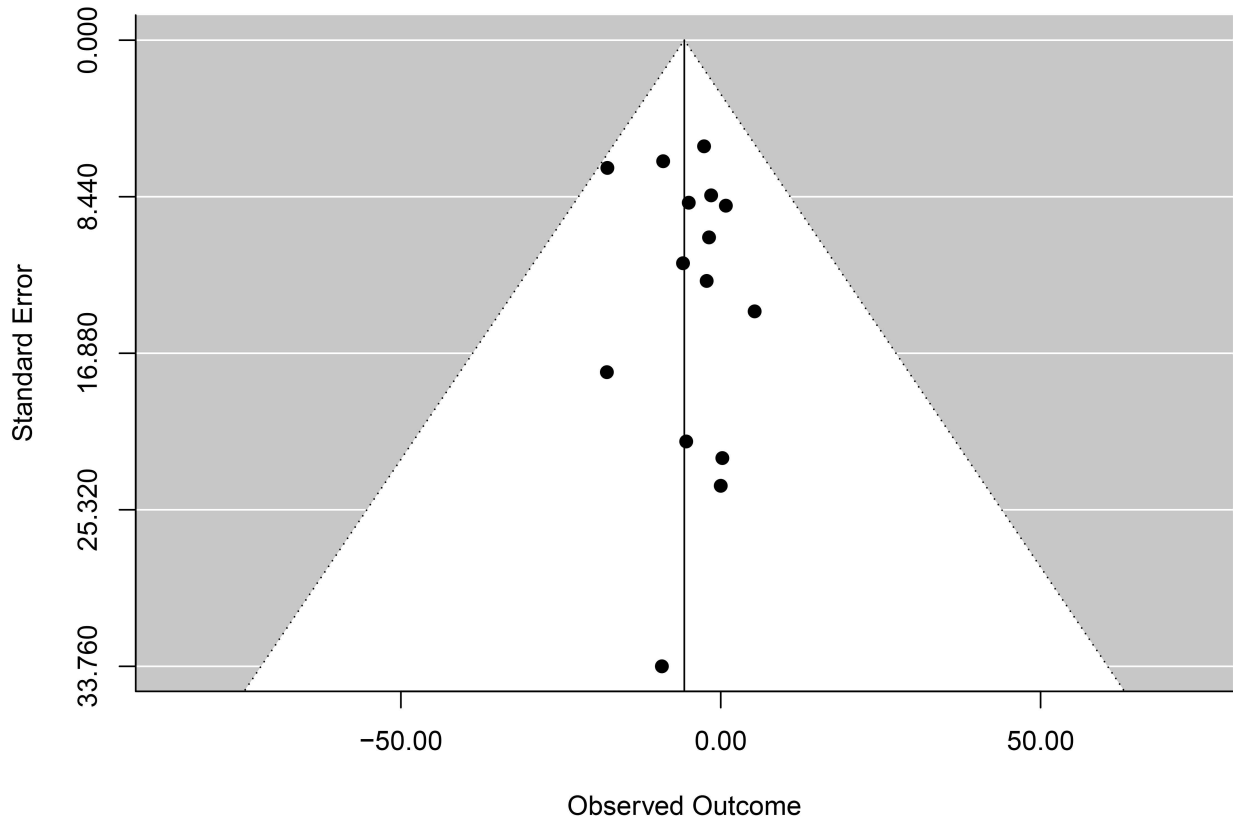

**Figure S1.** Assessment of publication bias using funnel plot. The lack of asymmetry in the funnel plot suggests no evidence of publication bias.

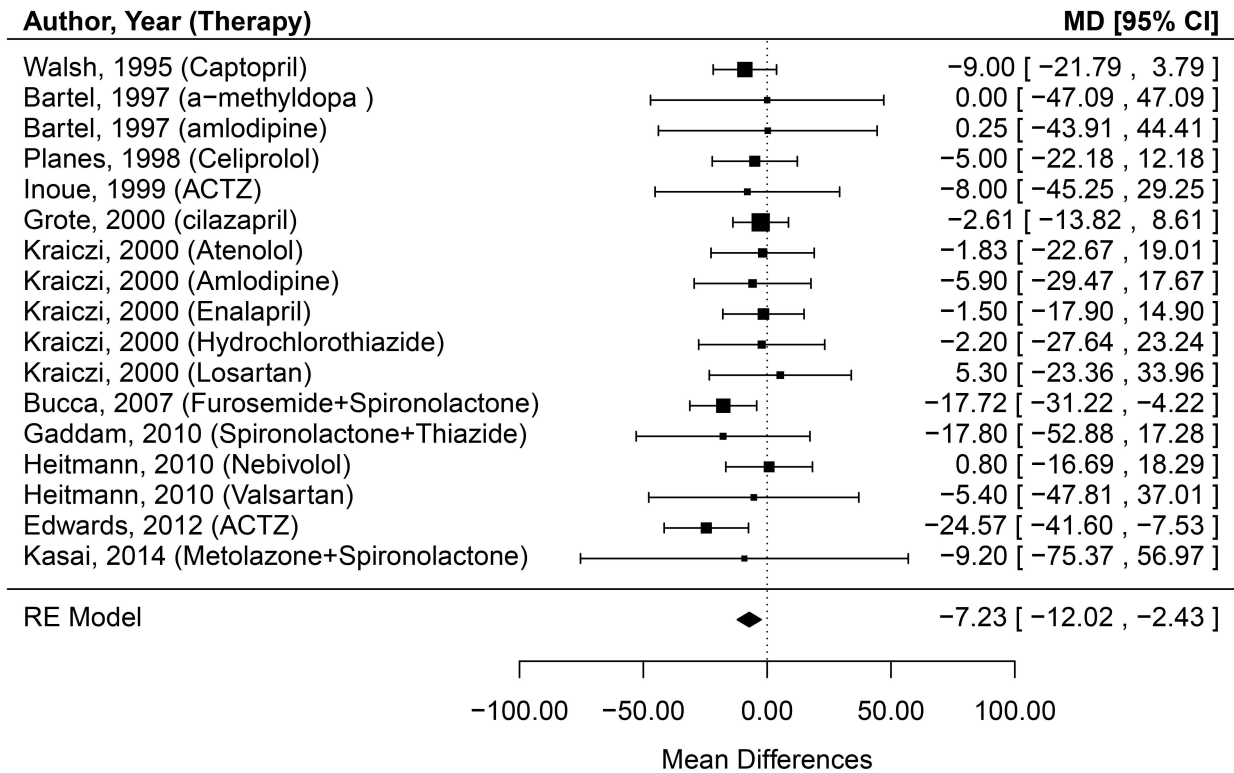

**Figure S2.** Effect of antihypertensive treatment (including acetazolamide) on change in severity of obstructive sleep apnea (mean change in apnea-hypopnea index). The effect size estimate is given for each study expressed in terms of mean differences (MD), with the corresponding 95% confidence interval (CI) indicated by the error bars. The pooled estimate is shown according to random effects (RE) model.

## Appendix

### Embase.com search strategy 1 (2012)

| #  | Search strategy                                                                                                                                                                                                                                                                                                                                                                                                                                                                                                                                                                                                                                                                                                                                                                                                                                                                                                                                                                                                                                                                                                                                                                                                                                                                                                                                                                                                                                                                                                                                                                                                                                                                                                                                                                                                                                                                                                                                                                                                                                                                                                                                                                                                                                                                                                                                                                                                                                                                                                                                                                                |
|----|------------------------------------------------------------------------------------------------------------------------------------------------------------------------------------------------------------------------------------------------------------------------------------------------------------------------------------------------------------------------------------------------------------------------------------------------------------------------------------------------------------------------------------------------------------------------------------------------------------------------------------------------------------------------------------------------------------------------------------------------------------------------------------------------------------------------------------------------------------------------------------------------------------------------------------------------------------------------------------------------------------------------------------------------------------------------------------------------------------------------------------------------------------------------------------------------------------------------------------------------------------------------------------------------------------------------------------------------------------------------------------------------------------------------------------------------------------------------------------------------------------------------------------------------------------------------------------------------------------------------------------------------------------------------------------------------------------------------------------------------------------------------------------------------------------------------------------------------------------------------------------------------------------------------------------------------------------------------------------------------------------------------------------------------------------------------------------------------------------------------------------------------------------------------------------------------------------------------------------------------------------------------------------------------------------------------------------------------------------------------------------------------------------------------------------------------------------------------------------------------------------------------------------------------------------------------------------------------|
| 1  | 'hypertension'                                                                                                                                                                                                                                                                                                                                                                                                                                                                                                                                                                                                                                                                                                                                                                                                                                                                                                                                                                                                                                                                                                                                                                                                                                                                                                                                                                                                                                                                                                                                                                                                                                                                                                                                                                                                                                                                                                                                                                                                                                                                                                                                                                                                                                                                                                                                                                                                                                                                                                                                                                                 |
| 2  | 'hypertension' OR ('antihypertensive' OR 'anti-hypertensive' OR 'anti hypertensive') OR 'ht' OR 'htn' OR 'acute hypertension' OR 'arterial hypertension' OR 'cardiovascular hypertension' OR 'controlled hypertension' OR 'endocrine hypertension' OR 'high blood pressure' OR 'high renin hypertension' OR 'hypertensive disease' OR 'hypertensive effect' OR 'hypertensive response' OR 'increased blood pressure' OR 'neurogenic hypertension' OR 'preexistent hypertension' OR 'refractory hypertension' OR 'salt high blood pressure' OR 'salt hypertension' OR 'secondary hypertension' OR 'systemic hypertension'                                                                                                                                                                                                                                                                                                                                                                                                                                                                                                                                                                                                                                                                                                                                                                                                                                                                                                                                                                                                                                                                                                                                                                                                                                                                                                                                                                                                                                                                                                                                                                                                                                                                                                                                                                                                                                                                                                                                                                       |
| 3  | ('blood pressure' NEAR/3 'high') OR ('blood pressure' NEAR/3 'elevated') OR ('bp' NEAR/3 'high') OR ('bp' NEAR/3 'elevated')                                                                                                                                                                                                                                                                                                                                                                                                                                                                                                                                                                                                                                                                                                                                                                                                                                                                                                                                                                                                                                                                                                                                                                                                                                                                                                                                                                                                                                                                                                                                                                                                                                                                                                                                                                                                                                                                                                                                                                                                                                                                                                                                                                                                                                                                                                                                                                                                                                                                   |
| 4  | 1 OR 2 OR 3                                                                                                                                                                                                                                                                                                                                                                                                                                                                                                                                                                                                                                                                                                                                                                                                                                                                                                                                                                                                                                                                                                                                                                                                                                                                                                                                                                                                                                                                                                                                                                                                                                                                                                                                                                                                                                                                                                                                                                                                                                                                                                                                                                                                                                                                                                                                                                                                                                                                                                                                                                                    |
| 5  | 'diuretic agent'                                                                                                                                                                                                                                                                                                                                                                                                                                                                                                                                                                                                                                                                                                                                                                                                                                                                                                                                                                                                                                                                                                                                                                                                                                                                                                                                                                                                                                                                                                                                                                                                                                                                                                                                                                                                                                                                                                                                                                                                                                                                                                                                                                                                                                                                                                                                                                                                                                                                                                                                                                               |
| 6  | 'diuretic' OR 'diuretic drug' OR 'diuretic drugs' OR 'diuretic effect' OR 'diuretic effects' OR 'diuretics' OR 'diureticum' OR 'mercurial diuretic' OR 'mercurial diuretics' OR 'mercury diuretic' OR 'mercury diuretic agent' OR 'mercury diuretic agents' OR 'mercury diuretics' OR 'organomercurial diuretic' OR 'organomercurial diuretics' OR 'saluretic agent' OR 'saluretic agents'                                                                                                                                                                                                                                                                                                                                                                                                                                                                                                                                                                                                                                                                                                                                                                                                                                                                                                                                                                                                                                                                                                                                                                                                                                                                                                                                                                                                                                                                                                                                                                                                                                                                                                                                                                                                                                                                                                                                                                                                                                                                                                                                                                                                     |
| 7  | '2 [4 (3 aminomethyl 4 hydroxybenzoyl) 2, 3 dichlorophenoxy] acetic acid ethyl ester' OR '2, 4 dihydro 6, 8 dinitro 1, 2, 4 triazolo [3, 4 c] [1, 4] benzoxazin 1 one' OR '2 aminomethyl 4 tert butyl 6 iodophenol' OR '3, 5 diamino 6 chloro n [1 [n [2 [2 hydroxy 3 (1 naphthoxy) propylamino] ethyl] carbamoyl] 1 methylethyl] pyrazine 2 carboxamide' OR '4 anilino 2 methylthiopyrido [2, 3 d] pyrimidine' OR '[5 chloro 3 (2 methylphenyl) 4 oxo 4h benzopyran 7 yl] oxy] acetic acid' OR '8 chloro 1 [alpha (2 dimethylaminoethyl) benzyl] 6 phenyl 4h 1, 2, 4 triazolo [4, 3 a] [1, 4] benzodiazepine' OR '8 chloro 3 (2 fluorophenyl) 5, 6 dihydrofuro [3, 2 f] [1, 2] benzisoxazole 6 carboxylate potassium' OR 'acetazolamide' OR 'alilusem' OR 'amisometradine' OR 'ammonium acetate' OR 'ascorbic acid plus mannitol hexanitrate plus reserpine plus rutoside plus theophylline' OR 'bemitradine' OR 'besulpamide' OR 'betaine plus mersalyl plus theophylline' OR 'brocricin' OR 'chlormerodrin' OR 'diclofenamide' OR 'ectylurea plus ethoxzolamide plus medroxyprogesterone acetate' OR 'ephedrine plus phenobarbital plus prednisone plus theophylline' OR 'epinine' OR 'ethoxzolamide' OR 'fenquizon' OR 'guaifenesin plus theophylline' OR 'homatropine methyl bromide plus hyoscyamine plus mepyramine maleate plus methamphetamine plus pamabrom plus scopolamine bromide' OR 'ibopamine' OR 'indapamide' OR 'indapamide plus perindopril' OR 'loop diuretic agent' OR 'mepyramine maleate plus pamabrom' OR 'mepyramine maleate plus pamabrom plus phenacetin plus salicylamide' OR 'meralluride' OR 'mercaptomerin' OR 'mercumatilin' OR 'merethoxylline' OR 'merethoxylline plus theophylline' OR 'mersalyl' OR 'mersalyl plus theophylline' OR 'methazolamide' OR 'meticrane' OR 'niravoline' OR 'osmotic diuretic agent' OR 'pamabrom' OR 'pamabrom plus paracetamol plus phenindamine' OR 'pamabrom plus phenacetin' OR 'pamabrom plus phenacetin plus salicylamide' OR 'perhexiline' OR 'perhexiline maleate' OR 'phenobarbital plus Rauwolfia alkaloid plus theobromine' OR 'phenobarbital plus reserpine plus theobromine' OR 'phenobarbital plus theobromine calcium salicylate' OR 'potassium iodide plus theophylline' OR 'potassium sparing diuretic agent' OR 'sali aldopur' OR 'sitalidone' OR 'skf 105494' OR 'theobromine' OR 'theobromine calcium salicylate' OR 'theophylline' OR 'thiazide diuretic agent' OR 'tiamizide' OR 'tienilic acid' OR 'tienoxolol' OR 'traxanox' OR 'triamterene plus xipamide' OR 'triniton' OR 'tripamide' OR 'viskaldix' |
| 8  | 5 OR 6 OR 7                                                                                                                                                                                                                                                                                                                                                                                                                                                                                                                                                                                                                                                                                                                                                                                                                                                                                                                                                                                                                                                                                                                                                                                                                                                                                                                                                                                                                                                                                                                                                                                                                                                                                                                                                                                                                                                                                                                                                                                                                                                                                                                                                                                                                                                                                                                                                                                                                                                                                                                                                                                    |
| 9  | 'alpha adrenergic receptor blocking agent'                                                                                                                                                                                                                                                                                                                                                                                                                                                                                                                                                                                                                                                                                                                                                                                                                                                                                                                                                                                                                                                                                                                                                                                                                                                                                                                                                                                                                                                                                                                                                                                                                                                                                                                                                                                                                                                                                                                                                                                                                                                                                                                                                                                                                                                                                                                                                                                                                                                                                                                                                     |
| 10 | 'Adrenergic alpha Antagonist' OR 'adrenergic alpha antagonists' OR 'Adrenergic alpha Blocker' OR 'Adrenergic alpha Blockers' OR 'Adrenergic alpha Receptor Blockader' OR 'Adrenergic alpha Receptor Blockaders' OR 'Adrenergic alpha-Antagonist' OR 'adrenergic alpha-antagonists' OR 'Adrenergic alpha-Blocker' OR 'Adrenergic alpha-Blockers' OR 'Adrenergic alpha-Receptor Blockader' OR 'Adrenergic alpha-Receptor Blockaders' OR 'alpha adrenergic antagonist' OR 'alpha adrenergic antagonists' OR                                                                                                                                                                                                                                                                                                                                                                                                                                                                                                                                                                                                                                                                                                                                                                                                                                                                                                                                                                                                                                                                                                                                                                                                                                                                                                                                                                                                                                                                                                                                                                                                                                                                                                                                                                                                                                                                                                                                                                                                                                                                                       |

|    |                                                                                                                                                                                                                                                                                                                                                                                                                                                                                                                                                                                                                                                                                                                                                                                                                                                                                                                                                                                                                                                                                                                                                                                                                                                                                                                                                                                                                                                                                                                                                                                                                                                                                                                                                                                                                                                                                                                                                                                                                                                                                                                                                                                                                                                                                                                                                                                                                                                                                                                                                                                                                                                                                                                                                                                                                                                                                                                                                                                                                                                                                                                                                                                                                                                                                                                                                                                                                                                                                                                                                                                                                                                                                                                                                                                                                                                                                                                                                                                                                                                                                                                                                                                                                                                                                                                                                                                                                                                                          |
|----|--------------------------------------------------------------------------------------------------------------------------------------------------------------------------------------------------------------------------------------------------------------------------------------------------------------------------------------------------------------------------------------------------------------------------------------------------------------------------------------------------------------------------------------------------------------------------------------------------------------------------------------------------------------------------------------------------------------------------------------------------------------------------------------------------------------------------------------------------------------------------------------------------------------------------------------------------------------------------------------------------------------------------------------------------------------------------------------------------------------------------------------------------------------------------------------------------------------------------------------------------------------------------------------------------------------------------------------------------------------------------------------------------------------------------------------------------------------------------------------------------------------------------------------------------------------------------------------------------------------------------------------------------------------------------------------------------------------------------------------------------------------------------------------------------------------------------------------------------------------------------------------------------------------------------------------------------------------------------------------------------------------------------------------------------------------------------------------------------------------------------------------------------------------------------------------------------------------------------------------------------------------------------------------------------------------------------------------------------------------------------------------------------------------------------------------------------------------------------------------------------------------------------------------------------------------------------------------------------------------------------------------------------------------------------------------------------------------------------------------------------------------------------------------------------------------------------------------------------------------------------------------------------------------------------------------------------------------------------------------------------------------------------------------------------------------------------------------------------------------------------------------------------------------------------------------------------------------------------------------------------------------------------------------------------------------------------------------------------------------------------------------------------------------------------------------------------------------------------------------------------------------------------------------------------------------------------------------------------------------------------------------------------------------------------------------------------------------------------------------------------------------------------------------------------------------------------------------------------------------------------------------------------------------------------------------------------------------------------------------------------------------------------------------------------------------------------------------------------------------------------------------------------------------------------------------------------------------------------------------------------------------------------------------------------------------------------------------------------------------------------------------------------------------------------------------------------------------------------|
|    | <p>'alpha adrenergic blocker' OR 'alpha Adrenergic Blockers ' OR 'alpha adrenergic blocking agent' OR 'alpha Adrenergic Blocking Agents' OR 'alpha adrenergic blocking drug' OR 'alpha adrenergic blocking drugs' OR 'alpha adrenergic receptor antagonist' OR 'alpha adrenergic receptor antagonists' OR 'alpha Adrenergic Receptor Blockader' OR 'alpha Adrenergic Receptor Blockaders' OR 'alpha adrenergic receptor blocker' OR 'alpha adrenergic receptor blockers' OR 'alpha adrenoceptor antagonist' OR 'alpha adrenoceptor antagonists' OR 'alpha adrenoceptor blocker' OR 'alpha adrenoceptor blockers' OR 'alpha adrenoceptor blocking agent' OR 'alpha adrenoceptor blocking agents' OR 'alpha adrenoceptor blocking drug' OR 'alpha adrenoceptor blocking drugs' OR 'alpha adrenolytic agent' OR 'alpha adrenolytic agents' OR 'alpha antiadrenergic agent' OR 'alpha antiadrenergic agents' OR 'alpha blocker' OR 'alpha blockers' OR 'alpha blocking agent' OR 'alpha blocking agents' OR 'alpha receptor blocker' OR 'alpha receptor blocker' OR 'alpha receptor blocking agent' OR 'alpha receptor blocking agents' OR 'alpha sympathicolytic agent' OR 'alpha sympathicolytic agents' OR 'alpha-Adrenergic Blocker' OR 'alpha-Adrenergic Blockers' OR 'alpha-Adrenergic Blocking Agent' OR 'alpha-Adrenergic Blocking Agents' OR 'alpha-Adrenergic Receptor Blockader' OR 'alpha-Adrenergic Receptor Blockaders'</p>                                                                                                                                                                                                                                                                                                                                                                                                                                                                                                                                                                                                                                                                                                                                                                                                                                                                                                                                                                                                                                                                                                                                                                                                                                                                                                                                                                                                                                                                                                                                                                                                                                                                                                                                                                                                                                                                                                                                                                                                                                                                                                                                                                                                                                                                                                                                                                                                                                                                                                                                                                                                                                                                                                                                                                                                                                                                                                                                                                                                                                    |
| 11 | <p>'1 (2 ethoxy 2 (3 pyridyl) ethyl) 4 (2 methoxyphenyl) piperazine' OR '1 (2 pyrimidinyl) piperazine' OR '1, 3, 4, 5', 6, 6', 7, 12b octahydro 1', 3' dimethyl 2h spiro (benzo (b) furo (2, 3 a) quinolizine 2, 4' pyrimidine 2' one' OR '1 (4 amino 6, 7 dimethoxy 2 quinazoliny) 4 (bicyclo (2.2.2) octa 2, 5 dien 2 ylcarbonyl) piperazine' OR '1, 4 dihydro 2, 6 dimethyl 4 (3 nitrophenyl) 3, 5 pyridinedicarboxylic acid 2 (n (2, 3 dihydro 1, 4 benzodioxin 2 yl) n methylamino) ethyl methyl ester' OR '1, 4 dihydro 2, 6 dimethyl 4 (4 nitrophenyl) 3, 5 pyridinedicarboxylic acid (3 (4, 4 diphenyl 1 piperidinyl) propyl) amide methyl ester' OR '12 ethylsulfonyl 5, 8, 8a, 9, 10, 11, 12, 12a, 13, 13a decahydro 3 methoxy 6h isoquino (2, 1 g) (1, 6) naphthyridine' OR '14alpha hydroxy 7, 8 methylenedioxyalloberbane' OR '2 (1 methyl 2 isoindolinylmethyl) 2 imidazoline' OR '2 ((2 (2, 6 dimethoxyphenoxy) ethyl) aminomethyl) 1, 4 benzodioxan' OR '2 (2 (3, 4 dimethoxyphenyl) ethyl) amino 1 (2, 6 dimethylphenoxy) propane' OR '2 (2 (4 (2 methoxyphenyl) 1 piperaziny) ethyl) 4, 4 dimethyl 1, 3 (2h, 4h) isoquinolinedione' OR '2 ((2 (4 hydroxy 3 iodophenyl) ethyl) aminomethyl) tetralone' OR '2 (2 (4 hydroxyphenyl) ethylaminomethyl) tetralone' OR '2 (2 ethoxy 1, 4 benzodioxan 2 yl) 2 imidazoline' OR '2 (2 methoxy 1, 4 benzodioxan 2 yl) 2 imidazoline' OR '2 (3 ((2 benzo (1, 4) dioxanyl) methylamino) propyl) 3 (2h) pyridazinone' OR '2, 3, 9, 13b tetrahydro 1, 2 dimethyl 1h imidazo (3, 4 f) morphanthridine' OR '2 ((4 (2 methoxyphenyl) 1 piperaziny) butyl) amino) 4, 6 dimethyl 5 pyrimidinecarboxylic acid ethyl ester' OR '2', 4', 6' trihydroxy 4 (1 pyrrolidinyl) butyrophenone' OR '2 (5 chloro 2 isoindolinylmethyl) 2 imidazoline' OR '2 bromo n (2 chloroethyl) n ethylbenzylamine' OR '2 ethoxy 1 (2h) quinolinecarboxylic acid ethyl ester' OR '3 (2 (4 (2 methoxyphenyl) 1 piperaziny) ethyl) 2, 4 (1h, 3h) quinazolinedione' OR '3 (n (2 (4 hydroxy 2 isopropyl 5 methylphenoxy) ethyl) n methylaminomethyl) 4 methoxy 2, 5, 6 trimethylphenol' OR '4 chloro 2 (2 imidazolin 2 ylamino) isoindoline' OR '4 chloro 6 isopropylamino 2 (4 methyl 1 piperaziny) 5 (methylsulfinyl) pyrimidine' OR '4 chloro 6 isopropylamino 5 methyl 2 (1 piperaziny) pyrimidine' OR '4 chloro 6 isopropylamino 5 methyl 2 (4 methyl 1 piperaziny) pyrimidine' OR '4 chloro 6 isopropylamino 5 methylthio 2 (1 piperaziny) pyrimidine' OR '4' hydroxy 2', 6' dimethoxy 4 pyrrolidinobutyrophenone' OR '4 tert butylamino 6 chloro 2 (4 methyl 1 piperaziny) 5 (methylthio) pyrimidine' OR '5 acetyl 2 ((2 (4 (2 methoxyphenyl) 1 piperaziny) ethyl) amino) 4, 6 dimethylpyrimidine' OR '5 bromo 4 chloro 6 isopropylamino 2 (1 piperaziny) pyrimidine' OR '5 chloro n (2 (2 cyclopropylmethoxyphenoxy) ethyl) alpha, alpha dimethyl 1h indole 3 ethanamine' OR '5 formylurapidil' OR '5 methylurapidil' OR '6 chloro 2, 3, 4, 5 tetrahydro 3 methyl 1h 3 benzazepine' OR '6 chloro 2, 3, 4, 5 tetrahydro 3 methyl 9 (3 methyl 2 butenyloxy) 1h 3 benzazepine' OR '7 chloro 3, 4, 5, 6 tetrahydro 4 methyl 2 vinylthieno (4, 3, 2 ef) (3) benzazepine' OR '8 (2 (4 (2 methoxyphenyl) 1 piperaziny) ethyl) 8 azaspiro (4.5) decane 7, 9 dione' OR '9 allyloxy 6 chloro 2, 3, 4, 5 tetrahydro 3 methyl 1h benzazepine' OR 'abanoquil' OR 'adimolol' OR 'alfuzosin' OR 'alpha 1 adrenergic receptor blocking agent' OR 'alpha 2 adrenergic receptor blocking agent' OR 'alpha ethyl 3, 4, 5 trimethoxy alpha (3 ((2 (2 methoxyphenoxy) ethyl) amino) propyl) benzeneacetonitrile fumarate' OR 'amosulalol' OR 'aptazapine' OR 'aptazapine maleate' OR 'atipamezole' OR 'belladonna alkaloid plus ergotamine tartrate plus phenobarbital' OR 'bellergal' OR 'benextramine' OR 'benoxathian' OR 'bufloxedil' OR 'bunazosin' OR 'cafergot' OR 'caffeine plus cyclizine plus ergotamine tartrate' OR 'caffeine plus ergotamine tartrate' OR 'cervilan' OR 'chloroethylclonidine' OR 'dapiprazole' OR 'defluina' OR 'delequamine' OR 'deriglidole' OR 'dibenamine' OR 'dihydrobenzoperidol' OR 'dihydroergocornine' OR 'dihydroergocristine' OR 'dihydroergocristine methanesulfonate' OR 'dihydroergocryptine' OR 'dihydroergotamine' OR 'dihydroergotamine mesilate' OR 'dihydroergotamine mesilate plus heparin plus lidocaine' OR 'dihydroergotamine' OR 'dihydroergotamine mesilate' OR 'doxazosin' OR 'doxazosin mesylate' OR</p> |

|    |                                                                                                                                                                                                                                                                                                                                                                                                                                                                                                                                                                                                                                                                                                                                                                                                                                                                                                                                                                                                                                                                                                                                                                                                                                                                                                                                                                                                                                                                                                                                                                                                                                                                                                                                                                                                                                                                                                                                                                                                                                                                                                                                                                                                                                                                                                                                                                                                                                                                                                                                                                                                                                                                                                                                                                                                                                                                                                                                                                                                                                                                                                                                                                                                                                                                                                                                                                                                                                                                                                                                                                                              |
|----|----------------------------------------------------------------------------------------------------------------------------------------------------------------------------------------------------------------------------------------------------------------------------------------------------------------------------------------------------------------------------------------------------------------------------------------------------------------------------------------------------------------------------------------------------------------------------------------------------------------------------------------------------------------------------------------------------------------------------------------------------------------------------------------------------------------------------------------------------------------------------------------------------------------------------------------------------------------------------------------------------------------------------------------------------------------------------------------------------------------------------------------------------------------------------------------------------------------------------------------------------------------------------------------------------------------------------------------------------------------------------------------------------------------------------------------------------------------------------------------------------------------------------------------------------------------------------------------------------------------------------------------------------------------------------------------------------------------------------------------------------------------------------------------------------------------------------------------------------------------------------------------------------------------------------------------------------------------------------------------------------------------------------------------------------------------------------------------------------------------------------------------------------------------------------------------------------------------------------------------------------------------------------------------------------------------------------------------------------------------------------------------------------------------------------------------------------------------------------------------------------------------------------------------------------------------------------------------------------------------------------------------------------------------------------------------------------------------------------------------------------------------------------------------------------------------------------------------------------------------------------------------------------------------------------------------------------------------------------------------------------------------------------------------------------------------------------------------------------------------------------------------------------------------------------------------------------------------------------------------------------------------------------------------------------------------------------------------------------------------------------------------------------------------------------------------------------------------------------------------------------------------------------------------------------------------------------------------------|
|    | 'dutasteride plus tamsulosin' OR 'efaroxan' OR 'embolex' OR 'ergocornine' OR 'ergocristine' OR 'ergocryptine' OR 'ergot alkaloid' OR 'ergot derivative' OR 'ergotamine' OR 'ergotamine tartrate' OR 'ergotoxine' OR 'fenspiride' OR 'fiduxosin' OR 'fipamezole' OR 'fluparoxan' OR 'hexamethonium chloride plus Rauwolfia alkaloid' OR 'idazoxan' OR 'ifenprodil' OR 'ifenprodil tartrate' OR 'imiloxan' OR 'indoramin' OR 'isaglidole' OR 'isaglidole maleate' OR 'metazosin' OR 'midaglizole' OR 'mirtazapine' OR 'n (1, 2, 3, 4, 6, 7 hexahydro 11h benzo (a) quinolizin 2 yl) n methylmethanesulfonamide' OR 'n (1, 3, 4, 6, 7, 11balpha hexahydro 2h benzo (a) quinolizin 2beta yl) n methyl 1 propanesulfonamide' OR 'n (1, 3, 4, 6, 7, 11balpha hexahydro 2h benzo (a) quinolizin 2beta yl) n methylisobutanesulfonamide' OR 'n (1, 3, 4, 6, 7, 12b hexahydro 2h benzo (b) furo (2, 3 a) quinolizin 2 yl) 2 hydroxy n methylethanesulfonamide' OR 'n (2 (1, 3, 4, 6, 7, 12b hexahydro 2` oxospiro (2h benzofuro (2, 3 a) quinolizine 2, 4` imidazolidin) 3` yl) ethyl) methanesulfonamide' OR 'naftopidil' OR 'napamezole' OR 'napitane' OR 'neldazosin' OR 'pentaerythryl tetranitrate plus Rauwolfia alkaloid' OR 'phenobarbital plus Rauwolfia alkaloid plus theobromine' OR 'phenoxybenzamine' OR 'phentolamine' OR 'phentolamine mesylate' OR 'piperoxan' OR 'polythiazide plus prazosin' OR 'pontuc' OR 'prazosin' OR 'proroxan' OR 'proxodolol' OR 'Rauwolfia alkaloid' OR 'rauwolescine' OR 'saterinone' OR 'silodosin' OR 'sunepitron' OR 'tamsulosin' OR 'taprizosin' OR 'terazosin' OR 'tiodazosin' OR 'tolazoline' OR 'tonopan' OR 'trazodone' OR 'trimazosin' OR 'upidosin' OR 'urapidil' OR 'wb 4104' OR 'wigraine' OR 'yohimbine'                                                                                                                                                                                                                                                                                                                                                                                                                                                                                                                                                                                                                                                                                                                                                                                                                                                                                                                                                                                                                                                                                                                                                                                                                                                                                                                                                                                                                                                                                                                                                                                                                                                                                                                                                                                                                                      |
| 12 | 9 OR 10 OR 11                                                                                                                                                                                                                                                                                                                                                                                                                                                                                                                                                                                                                                                                                                                                                                                                                                                                                                                                                                                                                                                                                                                                                                                                                                                                                                                                                                                                                                                                                                                                                                                                                                                                                                                                                                                                                                                                                                                                                                                                                                                                                                                                                                                                                                                                                                                                                                                                                                                                                                                                                                                                                                                                                                                                                                                                                                                                                                                                                                                                                                                                                                                                                                                                                                                                                                                                                                                                                                                                                                                                                                                |
| 13 | 'calcium channel blocking agent'                                                                                                                                                                                                                                                                                                                                                                                                                                                                                                                                                                                                                                                                                                                                                                                                                                                                                                                                                                                                                                                                                                                                                                                                                                                                                                                                                                                                                                                                                                                                                                                                                                                                                                                                                                                                                                                                                                                                                                                                                                                                                                                                                                                                                                                                                                                                                                                                                                                                                                                                                                                                                                                                                                                                                                                                                                                                                                                                                                                                                                                                                                                                                                                                                                                                                                                                                                                                                                                                                                                                                             |
| 14 | 'calcium blocker' OR 'calcium blockers' OR 'calcium blocking agent' OR 'calcium blocking agents' OR 'calcium channel antagonist' OR 'calcium channel antagonists' OR 'calcium channel blocker' OR 'calcium channel blockers' OR 'calcium entry blocker' OR 'calcium entry blockers' OR 'calcium entry blocking agent' OR 'calcium entry blocking agents' OR 'calcium inhibitor' OR 'calcium inhibitors'                                                                                                                                                                                                                                                                                                                                                                                                                                                                                                                                                                                                                                                                                                                                                                                                                                                                                                                                                                                                                                                                                                                                                                                                                                                                                                                                                                                                                                                                                                                                                                                                                                                                                                                                                                                                                                                                                                                                                                                                                                                                                                                                                                                                                                                                                                                                                                                                                                                                                                                                                                                                                                                                                                                                                                                                                                                                                                                                                                                                                                                                                                                                                                                      |
| 15 | '1 (2 (4 methoxyphenyl) 2 (3 (4 methoxyphenyl) propoxy) ethyl) 1h imidazole' OR '1 (2 (n benzyl 3, 4 methylenedioxyanilino) 1 (isobutoxymethyl) ethyl) pyrrolidine' OR '1` (4, 4 bis (3 fluorophenyl) butyl) 7 fluoro 2 methylspiro (2h 1, 4 benzodioxepin 3 (5h) 4` piperidine)' OR '1, 4 dihydro 2 (1 imidazolymethyl) 6 methyl 4 (3 nitrophenyl) 3, 5 pyridinedicarboxylic acid 3 ethyl 5 methyl ester' OR '1, 4 dihydro 2, 6 dimethyl 4 (2 nitrophenyl) 5 (2 oxo 1, 3, 2 dioxaphosphorinan 2 yl) 3 pyridinecarboxylic acid methyl ester' OR '1, 4 dihydro 2, 6 dimethyl 4 (2 trifluoromethylphenyl) 3, 5 pyridinedicarboxylic acid diethyl ester' OR '1, 4 dihydro 2, 6 dimethyl 4 (3 nitrophenyl) 3, 5 pyridinedicarboxylic acid 2 iodoethyl isopropyl ester' OR '1, 4 dihydro 2, 6 dimethyl 4 (3 nitrophenyl) 3, 5 pyridinedicarboxylic acid 2 (n (2, 3 dihydro 1, 4 benzodioxin 2 yl) n methylamino) ethyl methyl ester' OR '1, 4 dihydro 2, 6 dimethyl 4 (3 nitrophenyl) 3, 5 pyridinedicarboxylic acid 2 nitratopropyl 3 nitratopropyl ester' OR '1, 4 dihydro 2, 6 dimethyl 4 (3 nitrophenyl) 3, 5 pyridinedicarboxylic acid 3 (2 (4 (3, 4 dichlorophenyl) 1 piperazinyl) ethyl) 5 methyl ester' OR '1, 4 dihydro 2, 6 dimethyl 4 (3 nitrophenyl) 3, 5 pyridinedicarboxylic acid 3 (2 nicotinamidoethyl) 5 (3 nitroxypropyl) ester' OR '1, 4 dihydro 2, 6 dimethyl 4 (3 nitrophenyl) 3, 5 pyridinedicarboxylic acid (3 (4 (2 methoxyphenyl) 1 piperazinyl) propyl) methyl ester' OR '1, 4 dihydro 2, 6 dimethyl 4 (3 nitrophenyl) 3, 5 pyridinedicarboxylic acid 3 methyl 5 (6 (5 phenyl 3 pyrazolyloxy) hexyl) ester' OR '1, 4 dihydro 2, 6 dimethyl 4 (3 nitrophenyl) 3, 5 pyridinedicarboxylic acid (4 (2, 3 dihydroxypropoxy) phenethyl) methyl ester' OR '1, 4 dihydro 2, 6 dimethyl 4 (3 nitrophenyl) 3, 5 pyridinedicarboxylic acid dimethyl ester' OR '1, 4 dihydro 2, 6 dimethyl 5 nitro 4 (2 (trifluoromethyl) phenyl) 3 pyridinecarboxylic acid methyl ester' OR '1, 4 dihydro 2, 6 dimethyl 5 nitro 4 (thieno (3, 2 c) pyridin 3 yl) 3 pyridinecarboxylic acid 1 phenylethyl ester' OR '1, 4 dihydro 5 ((3 (4 (2 methoxyphenyl) 1 piperazinyl) propyl) carbamoyl) 2, 6 dimethyl 4 (3 nitrophenyl) 3 pyridinecarboxylic acid methyl ester' OR '1, 4 dihydro 5 isopropoxy 2 methyl 4 (2 trifluoromethylphenyl) 1, 6 naphthyridine 3 carboxylic acid ethyl ester' OR '2 ((2 ((3 amino 1h 1, 2, 4 triazol 5 yl) amino) ethoxy) methyl) 4 (2, 3 dichlorophenyl) 1, 4 dihydro 6 methyl 3, 5 pyridinedicarboxylic acid 3 ethyl 5 methyl ester' OR '2 (2, 5 dimethoxybenzyl) 3 (2 dimethylaminoethyl) 6 isopropoxy 4 (3h) quinazolinone' OR '2 ((2 amino 6 hydroxy 4 pyrimidinyl) methoxymethyl) 4 (2, 3 dichlorophenyl) 1, 4 dihydro 6 methyl 3, 5 pyridinedicarboxylic acid 3 ethyl 5 methyl ester' OR '2 (2 (carbamoylmethylamino) ethoxymethyl) 4 (2 chlorophenyl) 1, 4 dihydro 6 methyl 3, 5 pyridinedicarboxylic acid 3 ethyl 5 methyl ester' OR '2 (2 formamidoethylthiomethyl) 1, 4 dihydro 6 methyl 4 (3 nitrophenyl) 3, 5 pyridinedicarboxylic acid 3 ethyl 5 methyl ester' OR '2 (3, 4 dichlorophenyl) 5 ((3, 4 dimethoxyphenethyl) (methyl) amino) 2 isopropylvaleronitrile' OR '2 (3, 5 di tert butyl 4 hydroxyphenyl) 3 (3 (n methyl n (2 (3, 4 methylenedioxyphenoxy) ethyl) amino) propyl) 4 thiazolidinone' OR '2 (4 (3 (n (3, 4 dimethoxyphenethyl) n methylamino) propoxy) benzenesulfonyl) 3 isopropyl 1 methylindole' OR '2 (4 dimethylaminostyryl) 1 methylpyridinium iodide' OR '2 aminoethoxydiphenylborane' OR '2 cyclohexyl 2 hydroxy 2 phenylacetic |

acid 4 ethylamino 1, 1 dimethyl 2 butynyl ester' OR '3, 4, 5 trimethoxybenzoic acid 8 (diethylamino) octyl ester' OR '3 (4 cyano 4 (3, 4 dimethoxyphenyl) 5 methylhexyl) 1, 2, 3, 4 tetrahydro 6, 7 dimethoxy 2 methylisoquinoline' OR '3, 4 dihydro 2, 6 dimethyl 4 (2 nitrophenyl) 3, 5 pyrimidinedicarboxylic acid 3 (2 (n benzyl n (2 naphthylmethyl) amino) ethyl) 5 isopropyl ester' OR '3, 4 dihydro 2, 6 dimethyl 4 (2 nitrophenyl) 3, 5 pyrimidinedicarboxylic acid 3 (2 (n benzyl n (3, 4 dichlorobenzyl) amino) ethyl) 5 isopropyl ester' OR '3, 4 dihydro 2 isopropyl 4 methyl 2 (2 (4 (2 (3, 4, 5 trimethoxyphenyl) ethyl) piperazinyl) butoxy) phenyl) 2h 1, 4 benzothiazin 3 one' OR '3 acetoxy 1 (2 (dimethylamino) ethyl) 1, 3, 4, 5 tetrahydro 4 (4 methoxyphenyl) 6 trifluoromethyl 2h 1 benzazepin 2 one' OR '3 acetyl 2 (5 methoxy 2 (4 (n methyl n (3, 4, 5 trimethoxyphenethyl) amino) butoxy) phenyl) benzothiazoline' OR '4 (2, 3 dichlorophenyl) 1, 4 dihydro 2, 6 dimethyl 3, 5 pyridinedicarboxylic acid isopropyl methyl ester' OR '4 (3 (4 (4, 4' difluoro alpha hydroxybenzhydryl) piperidino) propoxy) alpha, alpha dimethylacetophenone' OR '4 (3 (4 (4, 4' difluorobenzhydryl) 1 piperidyl) propoxy) 3 methoxyacetophenone mandelate' OR '4 (3 chloro 6 fluoro 2 (trifluoromethyl) phenyl) 2 fluoromethyl 1, 4 dihydro 6 methyl 3, 5 pyridinedicarboxylic acid 3 methyl 5 isopropyl ester' OR '4, 7 dihydro 3 isobutyl 6 methyl 4 (3 nitrophenyl) thieno (2, 3 b) pyridine 5 carboxylic acid methyl ester' OR '5 cyano 1, 4 dihydro 6 methyl 2 (4 pyridylsulfonylmethyl) 4 (2 (trifluoromethyl) phenyl) 3 pyridinecarboxylic acid ethyl ester' OR '5 cyclopropylaminocarbonyl 1, 4 dihydro 2, 6 dimethyl 4 (2 nitrophenyl) 3 pyridinecarboxylic acid octyl ester' OR '5 n (3, 4 dimethoxyphenethyl) 2 (3, 4 dimethoxyphenethyl) 5 n methyl 2 isopropyl 1, 5 pentanediamine' OR '7 ((4 (bis (4 fluorophenyl) methyl) 1 piperazinyl) methyl) 2 ((2 hydroxyethyl) amino) 4 isopropyl 2, 4, 6 cycloheptatrien 1 one' OR '9 (2 chloro 6 fluorophenyl) 2, 3, 4, 5, 6, 9 hexahydro 7 methyl 1, 1 dioxothiacyclohepteno (3, 2 b) pyridine 8 carboxylic acid 2 (n benzyl n methylamino) ethyl ester' OR 'acebutolol plus nifedipine' OR 'agatoxin' OR 'aliskiren plus amlodipine' OR 'aliskiren plus amlodipine plus hydrochlorothiazide' OR 'amlodipine' OR 'amlodipine besylate' OR 'amlodipine maleate' OR 'amlodipine plus atorvastatin' OR 'amlodipine plus benazepril' OR 'amlodipine plus candesartan hexetil' OR 'amlodipine plus hydrochlorothiazide plus olmesartan' OR 'amlodipine plus hydrochlorothiazide plus valsartan' OR 'amlodipine plus olmesartan' OR 'amlodipine plus telmisartan' OR 'amlodipine plus valsartan' OR 'anipamil' OR 'aranidipine' OR 'atagabalin' OR 'atenolol plus nifedipine' OR 'azelnidipine' OR 'azidodiltiazem' OR 'azidopamil' OR 'azidopine' OR 'belfosdil' OR 'benidipine' OR 'benidipine derivative' OR 'bepiridil' OR 'brinazarone' OR 'calcisepetine' OR 'caroverine' OR 'caroverine fumarate' OR 'cilnidipine' OR 'clentiazem' OR 'clevidipine' OR 'columbianadin' OR 'conotoxin' OR 'cronidipine' OR 'd 890' OR 'darodipine' OR 'deacetyl n nordiltiazem' OR 'deacetyl n, o dinordiltiazem' OR 'deacetyl o nordiltiazem' OR 'deacetyldiltiazem' OR 'dealkylnorverapamil' OR 'dealkylverapamil' OR 'deutolperisone' OR 'devapamil' OR 'dexniguldipine' OR 'dexverapamil' OR 'diclofurime' OR 'diclofurime mesilate' OR 'diltiazem' OR 'diltiazem derivative' OR 'diltiazem plus enalapril maleate' OR 'diperdipine' OR 'diproteverine' OR 'dopropidil' OR 'dotarizine' OR 'efonidipine' OR 'elgodipine' OR 'elnadipine' OR 'emopamil' OR 'enalapril maleate plus felodipine' OR 'enalapril maleate plus nitrendipine' OR 'enecadin' OR 'eperisone' OR 'falipamil' OR 'fantofarone' OR 'fasudil' OR 'felodipine' OR 'felodipine plus metoprolol' OR 'felodipine plus ramipril' OR 'fendiline' OR 'flordipine' OR 'flosatidil' OR 'fluspirilene' OR 'fostedil' OR 'furnidipine' OR 'gallopamil' OR 'iganidipine' OR 'isoperisone' OR 'isradipine' OR 'lacidipine' OR 'lemildipine' OR 'lercanidipine' OR 'lifarizine' OR 'lomerizine' OR 'manidipine' OR 'mepamil' OR 'mepirodipine' OR 'mesudipine' OR 'meta nisoldipine' OR 'mibefradil' OR 'modipafant' OR 'monatepil' OR 'n (2 guanidinoethyl) 5 isoquinolinesulfonamide' OR 'n (3 ((2 (3, 4 dimethoxyphenyl) ethyl) amino) propyl) 4 nitrobenzamide' OR 'n (3, 4 dimethoxyphenethyl) 5 methoxy n, alpha dimethyl 2 (phenylethynyl) phenylpropanamine' OR 'n (3, 4 dimethoxyphenethyl) n methyl 2 (2 naphthyl) 1, 3 dithiane 2 propylamine' OR 'n (3, 5 dimethoxyphenethyl) 5 methoxy 2 (phenylethynyl) amphetamine' OR 'n (6 aminohexyl) 1 naphthalenesulfonamide' OR 'n (6 aminohexyl) 5 chloro 1 naphthalenesulfonamide' OR 'n methylbepiridil' OR 'n nordiltiazem' OR 'naltiazem' OR 'nexopamil' OR 'nicardipine' OR 'nifedipine' OR 'nifedipine derivative' OR 'niguldipine' OR 'niludipine' OR 'nilvadipine' OR 'nimodipine' OR 'nisoldipine' OR 'nitrendipine' OR 'norgallopamil' OR 'norverapamil' OR 'olradipine' OR 'omega agatoxin' OR 'omega agatoxin IVA' OR 'omega agatoxin VIA' OR 'omega conotoxin' OR 'omega conotoxin CVID' OR 'omega conotoxin GVIA' OR 'omega conotoxin MVIIA' OR 'omega conotoxin MVIIC' OR 'omega conotoxin SVIB' OR 'oxodipine' OR 'palonidipine' OR 'perhexiline' OR 'perhexiline maleate' OR 'pimozide' OR 'pinokalant' OR 'pontuc' OR 'pranidipine' OR 'riodipine' OR 'ronipamil' OR 'sagandipine' OR 'semotiadil' OR 'siratiazem' OR 'snx 482' OR 'tamolarizine' OR 'teludipine' OR 'temiverine' OR 'terodiline' OR 'tolperisone' OR 'trandolapril plus verapamil' OR 'trelnarizine' OR 'verapamil' OR 'verapamil derivative' OR 'veratide' OR 'watanidipine' OR 'xestospongine C' OR 'zonisamide'

|    |                                                                                                                                                                                                                                                                                                                                                                                                                                                                                                                                                                                                                                                                                                                                                                                                                                                                                                                                                                                                                                                                                                                                                                                                                                                                                                                                                                                                                                                                                                                                                                                                                                                                                                                                                                                                                                                                                                                                                                                                                                                                                                                                                                                                                                                                                                                                                                                                                                                                                                                                                                                                                                                                                       |
|----|---------------------------------------------------------------------------------------------------------------------------------------------------------------------------------------------------------------------------------------------------------------------------------------------------------------------------------------------------------------------------------------------------------------------------------------------------------------------------------------------------------------------------------------------------------------------------------------------------------------------------------------------------------------------------------------------------------------------------------------------------------------------------------------------------------------------------------------------------------------------------------------------------------------------------------------------------------------------------------------------------------------------------------------------------------------------------------------------------------------------------------------------------------------------------------------------------------------------------------------------------------------------------------------------------------------------------------------------------------------------------------------------------------------------------------------------------------------------------------------------------------------------------------------------------------------------------------------------------------------------------------------------------------------------------------------------------------------------------------------------------------------------------------------------------------------------------------------------------------------------------------------------------------------------------------------------------------------------------------------------------------------------------------------------------------------------------------------------------------------------------------------------------------------------------------------------------------------------------------------------------------------------------------------------------------------------------------------------------------------------------------------------------------------------------------------------------------------------------------------------------------------------------------------------------------------------------------------------------------------------------------------------------------------------------------------|
| 16 | 13 OR 14 OR 15                                                                                                                                                                                                                                                                                                                                                                                                                                                                                                                                                                                                                                                                                                                                                                                                                                                                                                                                                                                                                                                                                                                                                                                                                                                                                                                                                                                                                                                                                                                                                                                                                                                                                                                                                                                                                                                                                                                                                                                                                                                                                                                                                                                                                                                                                                                                                                                                                                                                                                                                                                                                                                                                        |
| 17 | 'ganglion blocking agent'                                                                                                                                                                                                                                                                                                                                                                                                                                                                                                                                                                                                                                                                                                                                                                                                                                                                                                                                                                                                                                                                                                                                                                                                                                                                                                                                                                                                                                                                                                                                                                                                                                                                                                                                                                                                                                                                                                                                                                                                                                                                                                                                                                                                                                                                                                                                                                                                                                                                                                                                                                                                                                                             |
| 18 | 'ganglion blocker' OR 'ganglion blockers' OR 'ganglion blocking drug' OR 'ganglion blocking drugs' OR 'Ganglionic Blockader' OR 'Ganglionic Blockaders' OR 'ganglionic blocker' OR 'ganglionic blockers' OR 'ganglionic blocking agent' OR 'ganglionic blocking agents' OR 'ganglioplegic agent' OR 'ganglioplegic agents'                                                                                                                                                                                                                                                                                                                                                                                                                                                                                                                                                                                                                                                                                                                                                                                                                                                                                                                                                                                                                                                                                                                                                                                                                                                                                                                                                                                                                                                                                                                                                                                                                                                                                                                                                                                                                                                                                                                                                                                                                                                                                                                                                                                                                                                                                                                                                            |
| 19 | 'azamethonium' OR 'benzohexonium' OR 'decylidiisopropylammonium iodide' OR 'hexamethonium' OR 'hexamethonium bromide' OR 'hexamethonium chloride' OR 'hexamethonium chloride plus Rauwolfia alkaloid' OR 'hexamethonium chloride plus reserpine' OR 'mecamylamine' OR 'meprobamate plus pentolonium tartrate' OR 'pempidine' OR 'pempidine tartrate' OR 'pempidine tosilate' OR 'pentolonium tartrate' OR 'tetrylammonium' OR 'tetrylammonium bromide' OR 'tetrylammonium chloride' OR 'trimetaphan' OR 'trimethidinium methosulfate'                                                                                                                                                                                                                                                                                                                                                                                                                                                                                                                                                                                                                                                                                                                                                                                                                                                                                                                                                                                                                                                                                                                                                                                                                                                                                                                                                                                                                                                                                                                                                                                                                                                                                                                                                                                                                                                                                                                                                                                                                                                                                                                                                 |
| 20 | 17 OR 18 OR 19                                                                                                                                                                                                                                                                                                                                                                                                                                                                                                                                                                                                                                                                                                                                                                                                                                                                                                                                                                                                                                                                                                                                                                                                                                                                                                                                                                                                                                                                                                                                                                                                                                                                                                                                                                                                                                                                                                                                                                                                                                                                                                                                                                                                                                                                                                                                                                                                                                                                                                                                                                                                                                                                        |
| 21 | 'vasodilator agent'                                                                                                                                                                                                                                                                                                                                                                                                                                                                                                                                                                                                                                                                                                                                                                                                                                                                                                                                                                                                                                                                                                                                                                                                                                                                                                                                                                                                                                                                                                                                                                                                                                                                                                                                                                                                                                                                                                                                                                                                                                                                                                                                                                                                                                                                                                                                                                                                                                                                                                                                                                                                                                                                   |
| 22 | 'Vasoactive Antagonist' OR 'Vasoactive Antagonists' OR 'Vasodilatant' OR 'vasodilatants' OR 'vasodilatating agent' OR 'vasodilatating agents' OR 'vasodilatator' OR 'vasodilatators' OR 'vasodilatator agent' OR 'vasodilatator agents' OR 'vasodilating agent' OR 'vasodilating agents' OR 'vasodilative agent' OR 'vasodilative agents' OR 'vasodilator' OR 'vasodilators' OR 'vasodilator activity' OR 'vasodilator agent' OR 'vasodilator agents' OR 'vasodilator drug' OR 'vasodilator drugs' OR 'vasodilator substance' OR 'vasodilator substances' OR 'Vasorelaxant' OR 'Vasorelaxants'                                                                                                                                                                                                                                                                                                                                                                                                                                                                                                                                                                                                                                                                                                                                                                                                                                                                                                                                                                                                                                                                                                                                                                                                                                                                                                                                                                                                                                                                                                                                                                                                                                                                                                                                                                                                                                                                                                                                                                                                                                                                                        |
| 23 | '2 [2 chloro 4 (2, 3, 4, 5 tetrahydro 3 oxo 6 pyridazinyl) phenoxy] n (2 morpholinoethyl) acetamide' OR '4, 5 dihydro 6 (4 (1h imidazol 1 yl) phenyl) 5 methyl 3 (2h) pyridazinone' OR '4 ethyl 2 hydroxyimino 5 nitro 3 hexenamide' OR '4 methyl 5 (4 pyridyl) 2 (3h) oxazolone' OR '4 propyl 5 (4 pyridyl) 2 (3h) oxazolone' OR '6 (4 (3 ((3 (4 (2 (cyclopropylmethoxy) ethyl) phenoxy) 2 hydroxypropyl) amino) propionamido) phenyl) 4, 5 dihydro 5 methyl 3 (2h) pyridazinone' OR '6 methyl 5 (4 pyridyl) 3h, 6h 1, 3, 4 thiaziazin 2 one' OR '8 hydroxy 7 nitro 2 nitromethyl 1, 4 benzodioxan' OR '8 tert butyl 6, 7 dihydro 5 methylpyrrolo (3, 2 e) pyrazolo (1, 5 a) pyrimidine 3 carbonitrile' OR 'acetylsalicylic acid plus dipyridamole' OR 'adrenomedullin' OR 'aligeron' OR 'amobarbital plus dimoxyline' OR 'amyl nitrite' OR 'ataciguat' OR 'ataprost' OR 'avi 4126' OR 'benfurodil' OR 'benfurodil hemisuccinate' OR 'bradykinin' OR 'briserin' OR 'bucindolol' OR 'carvedilol' OR 'cicaprost' OR 'ciclonicate' OR 'cilostazol' OR 'coronary vasodilating agent' OR 'cromakalim' OR 'dasantafil' OR 'dehydrocilostazol' OR 'dihydralazine plus oxprenolol' OR 'diisopropylamine dichloroacetate' OR 'dimoxyline' OR 'dorzolamide plus timolol maleate' OR 'dramedilol' OR 'eliprodil' OR 'endothelium derived hyperpolarizing factor' OR 'endothelium derived relaxing factor' OR 'enoximone' OR 'enoximone sulfoxide' OR 'etriciguat' OR 'fenoldopam' OR 'fenoldopam 4', 7, 8 tris (n ethylcarbamate)' OR 'fenoldopam 7, 8 bis (n ethylcarbamate)' OR 'fenoldopam mesilate' OR 'fronepidil' OR 'hydrochlorothiazide plus timolol maleate' OR 'ifenprodil' OR 'ifenprodil tartrate' OR 'iloprost' OR 'imazodan' OR 'kallidin' OR 'lemakalim' OR 'lemildipine' OR 'lodenafil' OR 'maxadilan' OR 'mirodenafil' OR 'n (1 (4 (4 fluorophenoxy) butyl) 4 piperidiny) n methyl 2 benzothiazolamine' OR 'n (1 carboxy 5 (4 (2 hydroxy 3 isopropylaminopropoxy) indole 2 carboxamido) pentyl) alanylproline' OR 'n (2 guanidinoethyl) 5 isoquinolinesulfonamide' OR 'n (3 nitratopivaloyl) cysteine ethyl ester' OR 'n acetyl s nitrosopenicillamine' OR 'n cyano n` (2 nitroxyethyl) 3 pyridinecarboximidamide' OR 'nicametate' OR 'nicardipine' OR 'nipradilol' OR 'peripheral vasodilating agent' OR 'pimobendan' OR 'pinoximone' OR 'proadrenomedullin' OR 'propentofylline' OR 'prostaglandin E1' OR 'proxazole' OR 'proxazole citrate' OR 'proxiphylline' OR 'puerarin' OR 's nitrosocaptopril' OR 's nitrosoglutathione' OR 'tetramethylpyrazine' OR 'timolol' OR 'timolol maleate' OR 'tiodazosin' OR 'trimethidinium methosulfate' OR 'visnadine' OR 'xantifibrate' |
| 24 | 21 OR 22 OR 23                                                                                                                                                                                                                                                                                                                                                                                                                                                                                                                                                                                                                                                                                                                                                                                                                                                                                                                                                                                                                                                                                                                                                                                                                                                                                                                                                                                                                                                                                                                                                                                                                                                                                                                                                                                                                                                                                                                                                                                                                                                                                                                                                                                                                                                                                                                                                                                                                                                                                                                                                                                                                                                                        |
| 25 | 'beta adrenergic receptor blocking agent'                                                                                                                                                                                                                                                                                                                                                                                                                                                                                                                                                                                                                                                                                                                                                                                                                                                                                                                                                                                                                                                                                                                                                                                                                                                                                                                                                                                                                                                                                                                                                                                                                                                                                                                                                                                                                                                                                                                                                                                                                                                                                                                                                                                                                                                                                                                                                                                                                                                                                                                                                                                                                                             |
| 26 | 'Adrenergic beta Antagonist' OR 'Adrenergic beta Antagonists' OR 'Adrenergic beta Receptor Blockader' OR 'Adrenergic beta Receptor Blockaders' OR 'Adrenergic beta-Antagonist' OR 'adrenergic beta-antagonists' OR 'Adrenergic beta-Blocker' OR 'Adrenergic beta-Blockers' OR 'Adrenergic beta-Receptor Blockader' OR 'Adrenergic beta-Receptor Blockaders' OR 'beta adrenergic antagonist' OR 'beta adrenergic antagonists' OR 'beta adrenergic blocker' OR 'beta adrenergic blockers' OR 'beta adrenergic blocking agent' OR 'beta Adrenergic Blocking Agents' OR 'beta adrenergic blocking drug' OR 'beta adrenergic blocking drugs' OR 'beta adrenergic receptor antagonist' OR 'beta adrenergic receptor                                                                                                                                                                                                                                                                                                                                                                                                                                                                                                                                                                                                                                                                                                                                                                                                                                                                                                                                                                                                                                                                                                                                                                                                                                                                                                                                                                                                                                                                                                                                                                                                                                                                                                                                                                                                                                                                                                                                                                         |

|    |                                                                                                                                                                                                                                                                                                                                                                                                                                                                                                                                                                                                                                                                                                                                                                                                                                                                                                                                                                                                                                                                                                                                                                                                                                                                                                                                                                                                                                                                                                                                                                                                                                                                                                                                                                                                                                                                                                                                                                                                                                                                                                                                                                                                                                                                                                                                                                                                                                                                                                                                                                                                                                                                                                                                                                                                                                                                                                                                                                                                                                                                                                                                                                                                                                                                                                                                                                                                                                                                                                                                                                                                                                                                                                                                                                                                                                                                                                                                                                                                                                                                                                                                                                                                            |
|----|------------------------------------------------------------------------------------------------------------------------------------------------------------------------------------------------------------------------------------------------------------------------------------------------------------------------------------------------------------------------------------------------------------------------------------------------------------------------------------------------------------------------------------------------------------------------------------------------------------------------------------------------------------------------------------------------------------------------------------------------------------------------------------------------------------------------------------------------------------------------------------------------------------------------------------------------------------------------------------------------------------------------------------------------------------------------------------------------------------------------------------------------------------------------------------------------------------------------------------------------------------------------------------------------------------------------------------------------------------------------------------------------------------------------------------------------------------------------------------------------------------------------------------------------------------------------------------------------------------------------------------------------------------------------------------------------------------------------------------------------------------------------------------------------------------------------------------------------------------------------------------------------------------------------------------------------------------------------------------------------------------------------------------------------------------------------------------------------------------------------------------------------------------------------------------------------------------------------------------------------------------------------------------------------------------------------------------------------------------------------------------------------------------------------------------------------------------------------------------------------------------------------------------------------------------------------------------------------------------------------------------------------------------------------------------------------------------------------------------------------------------------------------------------------------------------------------------------------------------------------------------------------------------------------------------------------------------------------------------------------------------------------------------------------------------------------------------------------------------------------------------------------------------------------------------------------------------------------------------------------------------------------------------------------------------------------------------------------------------------------------------------------------------------------------------------------------------------------------------------------------------------------------------------------------------------------------------------------------------------------------------------------------------------------------------------------------------------------------------------------------------------------------------------------------------------------------------------------------------------------------------------------------------------------------------------------------------------------------------------------------------------------------------------------------------------------------------------------------------------------------------------------------------------------------------------------------------|
|    | <p>antagonists' OR 'beta Adrenergic Receptor Blockader' OR 'beta Adrenergic Receptor Blockaders' OR 'beta adrenergic receptor blocker' OR 'beta adrenergic receptor blockers' OR 'beta adrenoceptor antagonist' OR 'beta adrenoceptor antagonists' OR 'beta adrenoceptor blocker' OR 'beta adrenoceptor blockers' OR 'beta adrenoceptor blocking agent' OR 'beta adrenoceptor blocking agents' OR 'beta adrenoceptor blocking drug' OR 'beta adrenoceptor blocking drugs' OR 'beta adrenolytic' OR 'beta adrenolytics' OR 'beta adrenolytic agent' OR 'beta adrenolytic agents' OR 'beta antagonist' OR 'beta antagonists' OR 'beta antiadrenergic agent' OR 'beta antiadrenergic agents' OR 'beta blocker' OR 'beta blockers' OR 'beta blocking adrenergic agent' OR 'beta blocking adrenergic agents' OR 'beta blocking agent' OR 'beta blocking agents' OR 'beta blocking drug' OR 'beta blocking drugs' OR 'beta receptor adrenergic blocking agent' OR 'beta receptor adrenergic blocking agents' OR 'beta receptor blocker' OR 'beta receptor blockers' OR 'beta receptor blocking agent' OR 'beta receptor blocking agents' OR 'beta sympathicolytic agent' OR 'beta sympathicolytic agents' OR 'beta sympathicolytics' OR 'beta sympatholytic agent' OR 'beta sympatholytic agents' OR 'beta-Adrenergic Blocker' OR 'beta-Adrenergic Blockers' OR 'beta-Adrenergic Blocking Agent' OR 'beta-Adrenergic Blocking Agents' OR 'beta-Adrenergic Receptor Blockader' OR 'beta-Adrenergic Receptor Blockaders' OR 'beta-blocker' OR 'beta-blockers' OR 'betasympatholytic agent' OR 'betasympatholytic agents'</p>                                                                                                                                                                                                                                                                                                                                                                                                                                                                                                                                                                                                                                                                                                                                                                                                                                                                                                                                                                                                                                                                                                                                                                                                                                                                                                                                                                                                                                                                                                                                                                                                                                                                                                                                                                                                                                                                                                                                                                                                                                                                                                                                                                                                                                                                                                                                                                                                                                                                                                                                                                                       |
| 27 | <p>'1 (1 naphthoxy) 3 (6 (2 (2 pyridyl) ethoxy) hexylamino) 2 propanol' OR '1 (2, 4 dichlorophenoxy) 3 (2 (3, 4 dimethoxyphenyl) ethylamino) 2 propanol' OR '1 (2 cyanophenoxy) 3 (2 (3 phenylureido) ethylamino) 2 propanol' OR '1 (2 ethylphenoxy) 3 (1, 2, 3, 4 tetrahydro 1 naphthylamino) 2 propanol oxalate' OR '1 isopropylamino 3 (4 (2 methoxyethoxy) phenoxy) 2 propanol' OR '1 tert butylamino 3 (2 chlorophenoxy) 2 propanol' OR '1 tert butylamino 3 (2 methyl 4 indolyloxy) 2 propanol' OR '1 tert butylamino 3 (3 methyl 2 nitrophenoxy) 2 propanol' OR '2 isopropylamino 1 (4 tolyl) propanol' OR '3 (4 (2 hydroxy 3 isopropylaminopropoxy) phenyl) propionic acid' OR '3, 5 diamino 6 chloro n (1 (n (2 (2 hydroxy 3 (1 naphthoxy) propylamino) ethyl) carbamoyl) 1 methylethyl) pyrazine 2 carboxamide' OR '3 isopropylamino 1 (7 methyl 4 indanyloxy) 2 butanol' OR '4 (2 hydroxy 3 ((1 methyl 3 phenylpropyl) amino) propoxy) benzeneacetamide' OR '4 (2 hydroxy 3 isopropylaminopropoxy) carbanilic acid propyl ester' OR '4 (3 tert butylamino 2 hydroxypropoxy) 2 benzimidazolone' OR '4 cyclohexylamino 1 (1 naphthoxy) 2 butanol' OR '4 methylthiopropanolol' OR '5 (2 ((2 hydroxy 3 (4 (1 methyl 4 trifluoromethyl 2 imidazolyl) phenoxy) propyl) amino) ethoxy) salicylamide' OR '6 (4 (3 ((3 (4 (2 (cyclopropylmethoxy) ethyl) phenoxy) 2 hydroxypropyl) amino) propionamido) phenyl) 4, 5 dihydro 5 methyl 3 (2h) pyridazinone' OR '8 bromoacetamido 1 (2 hydroxy 3 (4 indolyloxy) propylamino) para menthane' OR '8 hydroxycarteolol' OR '9 (1 tert butylamino 3 hydroxy 2 propyloxyimino) fluorene' OR 'acebutolol' OR 'acebutolol plus nifedipine' OR 'adaprolol' OR 'adimolol' OR 'afurolol' OR 'alpha hydroxymetoprolol' OR 'alprenolol' OR 'alprenolol derivative' OR 'amosulalol' OR 'arotinolol' OR 'atenolol' OR 'atenolol plus chlortalidone' OR 'atenolol plus nifedipine' OR 'befunolol' OR 'bendacalol' OR 'bendroflumethiazide plus nadolol' OR 'bendroflumethiazide plus propranolol' OR 'beta 1 adrenergic receptor blocking agent' OR 'beta 2 adrenergic receptor blocking agent' OR 'beta 3 adrenergic receptor blocking agent' OR 'betaxolol' OR 'betaxolol plus chlortalidone' OR 'betaxolol plus pilocarpine' OR 'bevantolol' OR 'bfe 55' OR 'bimatoprost plus timolol' OR 'bisoprolol' OR 'bisoprolol fumarate' OR 'bisoprolol fumarate plus hydrochlorothiazide' OR 'bopindolol' OR 'bornaprolol' OR 'brefonalol' OR 'brimonidine plus timolol' OR 'brinzolamide plus timolol' OR 'bromoacetylalprenololmenthane' OR 'bucindolol' OR 'bucumolol' OR 'bufetolol' OR 'bufuralol' OR 'bunitrolol' OR 'bunolol' OR 'bupranolol' OR 'butofilolol' OR 'butoxamine' OR 'carazolol' OR 'carteolol' OR 'carvedilol' OR 'celiprolol' OR 'cetamolol' OR 'chlortalidone plus metoprolol' OR 'chlortalidone plus metoprolol tartrate' OR 'cloranolol' OR 'cyanoiodopindolol' OR 'cyanopindolol' OR 'cyclopenthiiazide plus oxprenolol' OR 'deacetylmetipranolol' OR 'diacetolol' OR 'dihydralazine plus oxprenolol' OR 'dihydroalprenolol' OR 'dilevalol' OR 'dorzolamide plus timolol' OR 'dorzolamide plus timolol maleate' OR 'dramedilol' OR 'epanolol' OR 'ersentilide' OR 'esmolol' OR 'exaprolol' OR 'falintolol' OR 'falintolol oxalate' OR 'felodipine plus metoprolol' OR 'flestolol' OR 'flusoxolol' OR 'hydrochlorothiazide plus labetalol' OR 'hydrochlorothiazide plus metoprolol' OR 'hydrochlorothiazide plus metoprolol succinate' OR 'hydrochlorothiazide plus metoprolol tartrate' OR 'hydrochlorothiazide plus pindolol' OR 'hydrochlorothiazide plus propranolol' OR 'hydrochlorothiazide plus timolol maleate' OR 'hydroxybenzylpindolol' OR 'indenolol' OR 'iodopindolol' OR 'iprocrolol' OR 'isamoltane' OR 'isoxaprolol' OR 'labetalol' OR 'landiolol' OR 'latanoprost plus timolol' OR 'levobunolol' OR 'levomoprolol' OR 'medroxalol' OR 'mepindolol' OR 'mercuderamide' OR 'metipranolol' OR 'metoprolol' OR 'metoprolol fumarate' OR 'metoprolol succinate' OR 'metoprolol tartrate' OR 'moprolol' OR 'n (1 carboxy 5 (4 (2 hydroxy 3 isopropylaminopropoxy) indole 2 carboxamido) pentyl) alanylproline' OR 'n (2 (2 hydroxy 3 (4</p> |



|    |                                                                                                                                                                                                                                                                                                                                                                                                                                                                                                                                                                                                                                                                                                                                                                                                                                                                                                                                                                                                                                                                                                                                                                                                                                                                                                                                                                                                                                                                                                                                                                                                                                                                                                                                                                                                                                                                                                                                                                                                                                                                                                                                                                                                                                                                                                                                                                                                                                                                                                                                                                                                                                                                                                                                                                                                                                                                                                                                                                                                                                                                                                                                                                                                                                                                                                                                                                                                            |
|----|------------------------------------------------------------------------------------------------------------------------------------------------------------------------------------------------------------------------------------------------------------------------------------------------------------------------------------------------------------------------------------------------------------------------------------------------------------------------------------------------------------------------------------------------------------------------------------------------------------------------------------------------------------------------------------------------------------------------------------------------------------------------------------------------------------------------------------------------------------------------------------------------------------------------------------------------------------------------------------------------------------------------------------------------------------------------------------------------------------------------------------------------------------------------------------------------------------------------------------------------------------------------------------------------------------------------------------------------------------------------------------------------------------------------------------------------------------------------------------------------------------------------------------------------------------------------------------------------------------------------------------------------------------------------------------------------------------------------------------------------------------------------------------------------------------------------------------------------------------------------------------------------------------------------------------------------------------------------------------------------------------------------------------------------------------------------------------------------------------------------------------------------------------------------------------------------------------------------------------------------------------------------------------------------------------------------------------------------------------------------------------------------------------------------------------------------------------------------------------------------------------------------------------------------------------------------------------------------------------------------------------------------------------------------------------------------------------------------------------------------------------------------------------------------------------------------------------------------------------------------------------------------------------------------------------------------------------------------------------------------------------------------------------------------------------------------------------------------------------------------------------------------------------------------------------------------------------------------------------------------------------------------------------------------------------------------------------------------------------------------------------------------------------|
|    | (2 isobutoxyethoxy) phenoxy) propylamino) ethyl) 4 morpholinecarboxamide' OR 'n (2 (3 (4 (2 (2 cyclopropylmethoxyethoxy) ethyl) phenoxy) 2 hydroxypropylamino) ethyl) 4 hydroxy 1 piperidinecarboxamide' OR 'nadolol' OR 'nebulolol' OR 'nifenalol' OR 'nipradilol' OR 'oberadilol' OR 'oxprenolol' OR 'pafenolol' OR 'pamatolol' OR 'penbutolol' OR 'pindolol' OR 'pindolol derivative' OR 'practolol' OR 'prestim' OR 'primidolol' OR 'prizidilol' OR 'procinolol' OR 'pronetalol' OR 'propranolol' OR 'propranolol derivative' OR 'proxodolol' OR 'ridazolol' OR 'salcardolol' OR 'sandoz 204545' OR 'soquinolol' OR 'soquinolol mucate' OR 'sotalol' OR 'spirendolol' OR 'talinolol' OR 'tertadolol' OR 'tienoxolol' OR 'tilisolol' OR 'timolol' OR 'timolol maleate' OR 'timolol plus travoprost' OR 'tolamolol' OR 'toliprolol' OR 'trasitensin' OR 'trepress' OR 'tribendilol' OR 'viskaldix' OR 'xibenolol' OR 'zoleprodolol' OR 'zolertine'                                                                                                                                                                                                                                                                                                                                                                                                                                                                                                                                                                                                                                                                                                                                                                                                                                                                                                                                                                                                                                                                                                                                                                                                                                                                                                                                                                                                                                                                                                                                                                                                                                                                                                                                                                                                                                                                                                                                                                                                                                                                                                                                                                                                                                                                                                                                                                                                                                                       |
| 28 | 25 OR 26 OR 27                                                                                                                                                                                                                                                                                                                                                                                                                                                                                                                                                                                                                                                                                                                                                                                                                                                                                                                                                                                                                                                                                                                                                                                                                                                                                                                                                                                                                                                                                                                                                                                                                                                                                                                                                                                                                                                                                                                                                                                                                                                                                                                                                                                                                                                                                                                                                                                                                                                                                                                                                                                                                                                                                                                                                                                                                                                                                                                                                                                                                                                                                                                                                                                                                                                                                                                                                                                             |
| 29 | 'dipeptidyl carboxypeptidase inhibitor'                                                                                                                                                                                                                                                                                                                                                                                                                                                                                                                                                                                                                                                                                                                                                                                                                                                                                                                                                                                                                                                                                                                                                                                                                                                                                                                                                                                                                                                                                                                                                                                                                                                                                                                                                                                                                                                                                                                                                                                                                                                                                                                                                                                                                                                                                                                                                                                                                                                                                                                                                                                                                                                                                                                                                                                                                                                                                                                                                                                                                                                                                                                                                                                                                                                                                                                                                                    |
| 30 | 'ACE inhibitor' OR 'ACE Inhibitors' OR 'Angiotensin Converting Enzyme Antagonist' OR 'Angiotensin Converting Enzyme Antagonists' OR 'angiotensin converting enzyme inhibiting agent' OR 'angiotensin converting enzyme inhibiting agents' OR 'angiotensin converting enzyme inhibitor' OR 'angiotensin converting enzyme inhibitors' OR 'angiotensin i converting enzyme inhibitor' OR 'angiotensin i converting enzyme inhibitors' OR 'Angiotensin I-Converting Enzyme Inhibitor' OR 'Angiotensin I-Converting Enzyme Inhibitors' OR 'Angiotensin-Converting Enzyme Antagonist' OR 'Angiotensin-Converting Enzyme Antagonists' OR 'angiotensin-converting enzyme inhibitor' OR 'angiotensin-converting enzyme inhibitors' OR 'converting enzyme inhibitor' OR 'converting enzyme inhibitors' OR 'dipeptidyl carboxypeptidase i inhibitor' OR 'dipeptidyl carboxypeptidase i inhibitors' OR 'Enzyme Inhibitor' OR 'Enzyme Inhibitors' OR 'Kininase II Antagonist' OR 'Kininase II Antagonists' OR 'kininase ii inhibitor' OR 'kininase ii inhibitors' OR 'peptidyl dipeptidase inhibitor' OR 'peptidyl dipeptidase inhibitors' OR 'peptidyldipeptide hydrolase inhibitor' OR 'peptidyldipeptide hydrolase inhibitors'                                                                                                                                                                                                                                                                                                                                                                                                                                                                                                                                                                                                                                                                                                                                                                                                                                                                                                                                                                                                                                                                                                                                                                                                                                                                                                                                                                                                                                                                                                                                                                                                                                                                                                                                                                                                                                                                                                                                                                                                                                                                                                                                                                                      |
| 31 | '1, 2, 3, 4, 6, 7, 8, 12b octahydro 7 (2 mercapto 3 phenylpropionamido) 6 oxopyrido [2, 1 a] [2] benzazepine 4 carboxylic acid' OR '1 [3 [[1 [6 amino 2 (cyclobutylcarboxamido) hexanamido] 2 phenylethyl] hydroxyphosphinyloxy] butyryl] proline' OR '1 [3 (acetylthio) 3 benzoyl 2 methylpropionyl] proline' OR '1` [n (1 carboxy 3 phenylpropyl) alanyl] spiro [bicyclo [2.2.2] octane 2, 3` pyrrolidine] 5` carboxylic acid' OR '1` [n (1 carboxy 3 phenylpropyl) alanyl] spiro [bicyclo [2.2.2] octane 2, 3` pyrrolidine] 5` carboxylic acid 1 ethyl ester' OR '1 [n (1 ethoxycarbonyl 3 phenylpropyl) alanyl] 2, 3 dihydro 2 indolecarboxylic acid' OR '2 (3 mercapto 2 methylpropionyloxy) 3 methylthiopropionic acid' OR '3 carboxy 1, 2, 3, 7 tetrahydro 8 hydroxy 7 oxo 6 indolizidinepropionic acid' OR '7 [(1 carboxy 3 phenylpropyl) amino] 1, 2, 3, 4, 6, 7, 8, 12b octahydro 6 oxopyrido [2, 1 a] [2] benzazepine 4 carboxylic acid' OR '7 [(1 carboxy 3 phenylpropyl) amino] 3, 4, 6, 7, 8, 12b hexahydro 6 oxo 1h [1, 4] thiazino [3, 4 a] [2] benzazepine 4 carboxylic acid' OR '7 [(1 ethoxycarbonyl 3 phenylpropyl) amino] 1, 2, 3, 4, 6, 7, 8, 12b octahydro 6 oxopyrido [2, 1 a] [2] benzazepine 4 carboxylic acid benzhydryl ester' OR '7 (2 acetylthio 3 phenylpropionamido) 1, 2, 3, 4, 6, 7, 8, 12b octahydro 6 oxopyrido [2, 1 a] [2] benzazepine 4 carboxylic acid' OR 'alacepril' OR 'altiopril' OR 'altiopril calcium' OR 'amlodipine plus benazepril' OR 'ancovenin' OR 'atorvastatin plus ramipril' OR 'benazepril' OR 'benazepril plus hydrochlorothiazide' OR 'benazeprilat' OR 'captopril' OR 'captopril plus hydrochlorothiazide' OR 'ceranapril' OR 'cilazapril' OR 'cilazapril plus hydrochlorothiazide' OR 'cilazaprilat' OR 'deacetylalacepril' OR 'delapril' OR 'diltiazem plus enalapril maleate' OR 'enalapril' OR 'enalapril maleate' OR 'enalapril maleate plus felodipine' OR 'enalapril maleate plus hydrochlorothiazide' OR 'enalapril maleate plus nitrendipine' OR 'enalapril plus hydrochlorothiazide' OR 'enalaprilat' OR 'epicaptopril' OR 'fasidotril' OR 'fasidotrilat' OR 'felodipine plus ramipril' OR 'foroxymithine' OR 'fosinopril' OR 'fosinopril plus hydrochlorothiazide' OR 'fosinoprilat' OR 'gemopatrilat' OR 'hydrochlorothiazide plus lisinopril' OR 'hydrochlorothiazide plus moexipril' OR 'hydrochlorothiazide plus quinapril' OR 'hydrochlorothiazide plus ramipril' OR 'idrapril' OR 'ilepatril' OR 'imidapril' OR 'imidaprilat' OR 'indapamide plus perindopril' OR 'indolapril' OR 'k 13' OR 'libenzapril' OR 'lisinopril' OR 'moexipril' OR 'moexiprilat' OR 'n [[1 (2 acetylthio 3 methyl 1 oxobutylamino) 1 cyclopentyl] carbonyl] o methyltyrosine ethyl ester' OR 'n [[1 (2 mercapto 3 methyl 1 oxobutylamino) 1 cyclopentyl] carbonyl] o methyltyrosine' OR 'n (1 carboxy 3 phenylpropyl) lysylproline 4 hydroxybenzamidine' OR 'n [1 carboxy 5 [4 (2 hydroxy 3 isopropylaminopropoxy) indole 2 carboxamido] pentyl] alanylproline' OR 'n (2 mercaptomethyl 3 phenylbutyryl) alanine' OR 'n (5 benzamido 4 oxo 6 phenylhexanoyl) proline' OR 'n (8 amino 1 carboxyoctyl) alanylproline' OR 'n [n (1 ethoxycarbonyl 3 phenylpropyl) alanyl] n (1 pyrrolidinyl) glycine' OR 'omapatrilat' OR 'pentopril' OR 'pentoprilat' OR 'perindopril' OR 'perindopril tert butylamine' OR 'perindoprilat' OR 'pivopril' OR 'quinapril' |

|    |                                                                                                                                                                                                                                                                                                                                                                                                                                                                                                                                                                                                                                                                                                                                                                                                                                                                                                                                                                                                                                                                                                                                                                                                                                                                                                                                                                                                                                                                                                                                                                                                                                                                                                                                                                                                                                                                                                                                                                                                                                                                                                                                                                                                                                                                                                                                                                                                                                                                                                                                                                                                                                                                                                                                                                                                                                                                                                                                                                                                                                                                                                                                                                                                                                                                                                                                                                                                                                                                                                                                                                                                                                                                                                                                                                                                                                                                                                                                                                                                                                                                                                                                                                                                                                                                                       |
|----|---------------------------------------------------------------------------------------------------------------------------------------------------------------------------------------------------------------------------------------------------------------------------------------------------------------------------------------------------------------------------------------------------------------------------------------------------------------------------------------------------------------------------------------------------------------------------------------------------------------------------------------------------------------------------------------------------------------------------------------------------------------------------------------------------------------------------------------------------------------------------------------------------------------------------------------------------------------------------------------------------------------------------------------------------------------------------------------------------------------------------------------------------------------------------------------------------------------------------------------------------------------------------------------------------------------------------------------------------------------------------------------------------------------------------------------------------------------------------------------------------------------------------------------------------------------------------------------------------------------------------------------------------------------------------------------------------------------------------------------------------------------------------------------------------------------------------------------------------------------------------------------------------------------------------------------------------------------------------------------------------------------------------------------------------------------------------------------------------------------------------------------------------------------------------------------------------------------------------------------------------------------------------------------------------------------------------------------------------------------------------------------------------------------------------------------------------------------------------------------------------------------------------------------------------------------------------------------------------------------------------------------------------------------------------------------------------------------------------------------------------------------------------------------------------------------------------------------------------------------------------------------------------------------------------------------------------------------------------------------------------------------------------------------------------------------------------------------------------------------------------------------------------------------------------------------------------------------------------------------------------------------------------------------------------------------------------------------------------------------------------------------------------------------------------------------------------------------------------------------------------------------------------------------------------------------------------------------------------------------------------------------------------------------------------------------------------------------------------------------------------------------------------------------------------------------------------------------------------------------------------------------------------------------------------------------------------------------------------------------------------------------------------------------------------------------------------------------------------------------------------------------------------------------------------------------------------------------------------------------------------------------------------------------|
|    | OR 'quinaprilat' OR 'ramipril' OR 'ramiprilat' OR 'rentiapril' OR 's nitrosocaptopril' OR 'sampsaprilat' OR 'spirapril' OR 'spiraprilat' OR 'temocapril' OR 'temocaprilat' OR 'teprotide' OR 'trandolapril' OR 'trandolapril plus verapamil' OR 'trandolaprilat' OR 'utibapril' OR 'utibaprilat' OR 'vasopeptidase inhibitor' OR 'zabicipril' OR 'zabiciprilat' OR 'zofenopril' OR 'zofenoprilat'                                                                                                                                                                                                                                                                                                                                                                                                                                                                                                                                                                                                                                                                                                                                                                                                                                                                                                                                                                                                                                                                                                                                                                                                                                                                                                                                                                                                                                                                                                                                                                                                                                                                                                                                                                                                                                                                                                                                                                                                                                                                                                                                                                                                                                                                                                                                                                                                                                                                                                                                                                                                                                                                                                                                                                                                                                                                                                                                                                                                                                                                                                                                                                                                                                                                                                                                                                                                                                                                                                                                                                                                                                                                                                                                                                                                                                                                                     |
| 32 | 29 OR 30 OR 31                                                                                                                                                                                                                                                                                                                                                                                                                                                                                                                                                                                                                                                                                                                                                                                                                                                                                                                                                                                                                                                                                                                                                                                                                                                                                                                                                                                                                                                                                                                                                                                                                                                                                                                                                                                                                                                                                                                                                                                                                                                                                                                                                                                                                                                                                                                                                                                                                                                                                                                                                                                                                                                                                                                                                                                                                                                                                                                                                                                                                                                                                                                                                                                                                                                                                                                                                                                                                                                                                                                                                                                                                                                                                                                                                                                                                                                                                                                                                                                                                                                                                                                                                                                                                                                                        |
| 33 | 'antihypertensive agent'                                                                                                                                                                                                                                                                                                                                                                                                                                                                                                                                                                                                                                                                                                                                                                                                                                                                                                                                                                                                                                                                                                                                                                                                                                                                                                                                                                                                                                                                                                                                                                                                                                                                                                                                                                                                                                                                                                                                                                                                                                                                                                                                                                                                                                                                                                                                                                                                                                                                                                                                                                                                                                                                                                                                                                                                                                                                                                                                                                                                                                                                                                                                                                                                                                                                                                                                                                                                                                                                                                                                                                                                                                                                                                                                                                                                                                                                                                                                                                                                                                                                                                                                                                                                                                                              |
| 34 | 'anti hypertensic agent' OR 'anti hypertensic agents' OR 'anti hypertensive' OR 'anti hypertensives' OR 'anti hypertensive agent' OR 'Anti Hypertensive Agents' OR 'anti hypertensive drug' OR 'Anti Hypertensive Drugs' OR 'antihypertension agent' OR 'antihypertension agents' OR 'antihypertensive' OR 'antihypertensives' OR 'Anti-Hypertensive' OR 'Anti-Hypertensives' OR 'Antihypertensive Agent' OR 'Antihypertensive Agents' OR 'Anti-Hypertensive Agent' OR 'Anti-Hypertensive Agents' OR 'antihypertensive agents' OR 'Antihypertensive Agents' OR 'antihypertensive drug' OR 'Antihypertensive Drugs' OR 'Anti-Hypertensive' OR 'Anti-Hypertensives' OR 'antihypertonic agent' OR 'antihypertonic agents' OR 'hypotensiva' OR 'hypotensives' OR 'hypotensivas' OR 'hypotensive' OR 'hypotensive agent' OR 'hypotensive agents' OR 'hypotensive drug' OR 'hypotensive drugs'                                                                                                                                                                                                                                                                                                                                                                                                                                                                                                                                                                                                                                                                                                                                                                                                                                                                                                                                                                                                                                                                                                                                                                                                                                                                                                                                                                                                                                                                                                                                                                                                                                                                                                                                                                                                                                                                                                                                                                                                                                                                                                                                                                                                                                                                                                                                                                                                                                                                                                                                                                                                                                                                                                                                                                                                                                                                                                                                                                                                                                                                                                                                                                                                                                                                                                                                                                                              |
| 35 | '1 ((6 hydrazino 3 pyridazinyl) ethylamino) 2 propanol' OR '1 tert butylamino 3 (2 methyl 4 indolyloxy) 2 propanol' OR '2 (2 (3, 4 dimethoxyphenyl) ethyl) amino 1 (2, 6 dimethylphenoxy) propane' OR '2 (2 (4 fluorophenoxy) ethyl) phenol' OR '(2 (2 (4 fluorophenoxy) ethyl) phenyl) sulfate' OR '2 (3 ((2 benzo (1, 4) dioxanyl) methylamino) propyl) 3 (2h) pyridazinone' OR '2 guanidinobenzimidazole' OR '3 (2 (4 (2 methoxyphenyl) 1 piperazinyl) ethyl) 2, 4 (1h, 3h) quinazolinone' OR '4 (2 (3 cyclohexyl 3 hydroxy 1 propynyl) 3 hydroxybicyclo (4.2.0) oct 7 ylidene) butyric acid' OR '4 (5) (2 (2, 6 dimethylphenyl) ethyl) imidazole' OR '4 amino 5 cyclopropyl 2 (1 (2 fluorobenzyl) 1h pyrazolo (3, 4 b) pyridin 3 yl) pyrimidine' OR '5 amino 2 guanidinobenzimidazole' OR '((5 chloro 3 (2 methylphenyl) 4 oxo 4h benzopyran 7 yl) oxy) acetic acid' OR '5 formylurapidil' OR '5 methylurapidil' OR '6 (4 (3 ((3 (4 (2 (cyclopropylmethoxy) ethyl) phenoxy) 2 hydroxypropyl) amino) propionamido) phenyl) 4, 5 dihydro 5 methyl 3 (2h) pyridazinone' OR '6, 7 dichloro 2, 3 dihydro 5 (n, n dimethylsulfamoyl) coumarilic acid' OR 'acebutolol plus nifedipine' OR 'acecarbromal plus reserpine' OR 'adimolol' OR 'adrenomedullin' OR 'alfuzosin' OR 'aliskiren plus amlodipine' OR 'aliskiren plus amlodipine plus hydrochlorothiazide' OR 'aliskiren plus hydrochlorothiazide' OR 'altizide' OR 'amiloride plus cyclopenthiiazide' OR 'amiloride plus hydrochlorothiazide' OR 'amlodipine' OR 'amlodipine besylate' OR 'amlodipine maleate' OR 'amlodipine plus atorvastatin' OR 'amosulalol' OR 'angiotensin receptor antagonist' OR 'arotinolol' OR 'ascorbic acid plus hesperidin plus reserpine' OR 'ascorbic acid plus mannitol hexanitrate plus reserpine plus rutoside' OR 'ascorbic acid plus mannitol hexanitrate plus reserpine plus rutoside plus theophylline' OR 'atenolol' OR 'atenolol plus chlortalidone' OR 'atenolol plus nifedipine' OR 'atropine plus hyoscyamine plus reserpine plus scopolamine bromide' OR 'azelnidipine' OR 'bamethan' OR 'bendroflumethiazide' OR 'bendroflumethiazide plus nadolol' OR 'bendroflumethiazide plus potassium chloride' OR 'bendroflumethiazide plus propranolol' OR 'benidipine' OR 'benzthiazide' OR 'benzthiazide plus triamterene' OR 'benzylhydrochlorothiazide' OR 'besulpamide' OR 'betanidine' OR 'betaxolol plus chlortalidone' OR 'bevantolol' OR 'bisoprolol fumarate plus hydrochlorothiazide' OR 'bopindolol' OR 'briserin' OR 'bucindolol' OR 'budralazine' OR 'bufuralol' OR 'bunazosin' OR 'butizide' OR 'butizide plus spironolactone' OR 'cadralazine' OR 'carboxirole' OR 'carteolol' OR 'carvedilol' OR 'catestatin' OR 'celikalim' OR 'celiprolol' OR 'centhaquin' OR 'cetamolol' OR 'chlorisondamine' OR 'chlorothiazide' OR 'chlorothiazide plus methyl dopa' OR 'chlorothiazide plus reserpine' OR 'chlortalidone' OR 'chlortalidone plus clonidine' OR 'chlortalidone plus metoprolol' OR 'chlortalidone plus metoprolol tartrate' OR 'chlortalidone plus reserpine' OR 'cicletanine' OR 'clentiazem' OR 'clonidine' OR 'clonidine' OR 'clonidine' OR 'cloranolol' OR 'clorexolone' OR 'cromakalim' OR 'cryptenamine' OR 'cryptenamine plus reserpine' OR 'cyanocobalamin plus rescinnamine plus thiamine' OR 'cyclopenthiiazide' OR 'cyclopenthiiazide plus guanethidine' OR 'cyclopenthiiazide plus oxprenolol' OR 'cyclothiazide' OR 'debrisoquine' OR 'deserpidine' OR 'deserpidine plus hydrochlorothiazide' OR 'deserpidine plus methyclothiazide' OR 'deserpidine plus pentobarbital' OR 'dexamphetamine plus reserpine' OR 'diazoxide' OR 'diethylstilbestrol plus methyltestosterone plus reserpine' OR 'dihydralazine' OR 'dihydralazine plus hydrochlorothiazide plus reserpine' OR 'dihydralazine plus oxprenolol' OR 'dihydralazine plus reserpine' OR 'diisopropylamine' OR 'diisopropylamine dichloroacetate' OR 'dilevalol' OR 'dimevamide plus phenobarbital plus reserpine' OR 'dipeptidyl carboxypeptidase inhibitor' OR 'diucomb' OR 'doxazosin' OR 'doxazosin mesylate' OR 'dramedilol' OR 'endralazine' OR 'ephedrine sulfate plus reserpine' OR 'epitizide' OR 'etacrylic acid' OR 'ethinylestradiol plus reserpine' OR 'felodipine' OR 'felodipine plus |

|    |                                                                                                                                                                                                                                                                                                                                                                                                                                                                                                                                                                                                                                                                                                                                                                                                                                                                                                                                                                                                                                                                                                                                                                                                                                                                                                                                                                                                                                                                                                                                                                                                                                                                                                                                                                                                                                                                                                                                                                                                                                                                                                                                                                                                                                                                                                                                                                                                                                                                                                                                                                                                                                                                                                                                                                                                                                                                                                                                                                                                                                                                                                                                                                                                                                                                                                                                                                                                                                                                                                                                                                                                                                                                                                                                                                                                                                                                                                                                                                                                                                                                                                                                                                                                                                                                                                                                                                                                                                                                                                                                                                                                                                                                                                                                                                                                                                                                                                                                                                                                                                                                          |
|----|--------------------------------------------------------------------------------------------------------------------------------------------------------------------------------------------------------------------------------------------------------------------------------------------------------------------------------------------------------------------------------------------------------------------------------------------------------------------------------------------------------------------------------------------------------------------------------------------------------------------------------------------------------------------------------------------------------------------------------------------------------------------------------------------------------------------------------------------------------------------------------------------------------------------------------------------------------------------------------------------------------------------------------------------------------------------------------------------------------------------------------------------------------------------------------------------------------------------------------------------------------------------------------------------------------------------------------------------------------------------------------------------------------------------------------------------------------------------------------------------------------------------------------------------------------------------------------------------------------------------------------------------------------------------------------------------------------------------------------------------------------------------------------------------------------------------------------------------------------------------------------------------------------------------------------------------------------------------------------------------------------------------------------------------------------------------------------------------------------------------------------------------------------------------------------------------------------------------------------------------------------------------------------------------------------------------------------------------------------------------------------------------------------------------------------------------------------------------------------------------------------------------------------------------------------------------------------------------------------------------------------------------------------------------------------------------------------------------------------------------------------------------------------------------------------------------------------------------------------------------------------------------------------------------------------------------------------------------------------------------------------------------------------------------------------------------------------------------------------------------------------------------------------------------------------------------------------------------------------------------------------------------------------------------------------------------------------------------------------------------------------------------------------------------------------------------------------------------------------------------------------------------------------------------------------------------------------------------------------------------------------------------------------------------------------------------------------------------------------------------------------------------------------------------------------------------------------------------------------------------------------------------------------------------------------------------------------------------------------------------------------------------------------------------------------------------------------------------------------------------------------------------------------------------------------------------------------------------------------------------------------------------------------------------------------------------------------------------------------------------------------------------------------------------------------------------------------------------------------------------------------------------------------------------------------------------------------------------------------------------------------------------------------------------------------------------------------------------------------------------------------------------------------------------------------------------------------------------------------------------------------------------------------------------------------------------------------------------------------------------------------------------------------------------------------------------------|
|    | metoprolol' OR 'fenoldopam' OR 'fenoldopam 4', 7, 8 tris (n ethylcarbamate)' OR 'fenoldopam 7, 8 bis (n ethylcarbamate)' OR 'fenoldopam mesilate' OR 'flavodilol' OR 'flavodilol maleate' OR 'flesinoxan' OR 'flutnidine' OR 'forskolin' OR 'furosemide' OR 'glyceryl trinitrate plus pentaerythrityl tetranitrate plus reserpine' OR 'guabenxan' OR 'guanabenz' OR 'guanabenz acetate' OR 'guanacline' OR 'guanadrel' OR 'guanadrel sulfate' OR 'guanazodine' OR 'guancidine' OR 'guanclor' OR 'guanethidine' OR 'guanethidine plus hydrochlorothiazide' OR 'guanfacine' OR 'guanoclor' OR 'guanoxabenz' OR 'guanoxan' OR 'hexamethonium' OR 'hexamethonium bromide' OR 'hexamethonium chloride' OR 'hexamethonium chloride plus Rauwolfia alkaloid' OR 'hexamethonium chloride plus reserpine' OR 'hydralazine' OR 'hydralazine plus hydrochlorothiazide' OR 'hydralazine plus hydrochlorothiazide plus reserpine' OR 'hydralazine plus reserpine' OR 'hydrochlorothiazide' OR 'hydrochlorothiazide plus labetalol' OR 'hydrochlorothiazide plus meprobamate' OR 'hydrochlorothiazide plus methyl dopa' OR 'hydrochlorothiazide plus metoprolol' OR 'hydrochlorothiazide plus metoprolol succinate' OR 'hydrochlorothiazide plus metoprolol tartrate' OR 'hydrochlorothiazide plus pentaerythrityl tetranitrate' OR 'hydrochlorothiazide plus pindolol' OR 'hydrochlorothiazide plus potassium chloride' OR 'hydrochlorothiazide plus potassium chloride plus reserpine' OR 'hydrochlorothiazide plus propranolol' OR 'hydrochlorothiazide plus reserpine' OR 'hydrochlorothiazide plus reserpine plus secbutabarbital' OR 'hydrochlorothiazide plus spironolactone' OR 'hydrochlorothiazide plus syrosingopine' OR 'hydrochlorothiazide plus timolol maleate' OR 'hydrochlorothiazide plus triamterene' OR 'hydroflumethiazide' OR 'hydroflumethiazide plus potassium chloride' OR 'hydroflumethiazide plus potassium chloride plus reserpine' OR 'hydroflumethiazide plus reserpine' OR 'indacrinone' OR 'indapamide' OR 'indoramin' OR 'iptakalim' OR 'irindalone' OR 'kadiur' OR 'ketanserin' OR 'ketanserin tartrate' OR 'ketanserinol' OR 'lemakalim' OR 'levomoprolol' OR 'lofexidine' OR 'losulazine' OR 'mebutamate' OR 'mebutizide' OR 'mecamylamine' OR 'medullipin 1' OR 'medullipin 2' OR 'mefruside' OR 'meprobamate plus pentolonium tartrate' OR 'mercuderamide' OR 'metazosin' OR 'methamphetamine plus reserpine' OR 'methyclothiazide' OR 'methyclothiazide plus pargyline' OR 'methyclothiazide plus reserpine' OR 'methyl dopa' OR 'methyl dopate' OR 'methylphenobarbital plus reserpine' OR 'metipranolol' OR 'metirosine' OR 'metirosine methyl ester' OR 'metolazone' OR 'minoxidil' OR 'minoxidil sulfate' OR 'miopressin' OR 'molsidomine' OR 'moprolol' OR 'moxonidine' OR 'muzolimine' OR 'n (3, 4 dimethoxyphenethyl) 5 methoxy n, alpha dimethyl 2 (phenylethynyl) phenylpropanamine' OR 'naftopidil' OR 'neбиволol' OR 'nexopamil' OR 'nicotinic acid plus pentetrazole plus reserpine' OR 'nipradilol' OR 'nitroprusside sodium' OR 'pempidine' OR 'pempidine tartrate' OR 'pempidine tosilate' OR 'penbutolol' OR 'penflutizide' OR 'pentaerythrityl tetranitrate plus Rauwolfia alkaloid' OR 'pentaerythrityl tetranitrate plus reserpine' OR 'pentaerythrityl tetranitrate plus reserpine plus secbutabarbital' OR 'pentobarbital plus reserpine' OR 'pentolonium tartrate' OR 'pf 3392455' OR 'pf 489791' OR 'phenobarbital plus Rauwolfia alkaloid plus theobromine' OR 'phenobarbital plus reserpine' OR 'phenobarbital plus reserpine plus theobromine' OR 'phenobarbital plus reserpine plus thiamine' OR 'phenoxybenzamine' OR 'phentolamine' OR 'phentolamine mesylate' OR 'pholedrine' OR 'pinacidil' OR 'piretanide' OR 'polythiazide' OR 'polythiazide plus prazosin' OR 'polythiazide plus reserpine' OR 'pontuc' OR 'prazosin' OR 'prestim' OR 'prizidilol' OR 'proadrenomedullin' OR 'propranolol' OR 'protoveratrine A plus protoveratrine B plus reserpine' OR 'protoveratrine A plus reserpine' OR 'pyrrobutamine plus reserpine' OR 'quinethazone' OR 'quinethazone plus reserpine' OR 'quinpirole' OR 'rautrax' OR 'rautrax n' OR 'Rauwolfia alkaloid' OR 'rauwolescine' OR 'rescinnamine' OR 'reserpine' OR 'reserpine derivative' OR 'reserpine plus secbutabarbital' OR 'reserpine plus trichlormethiazide' OR 'rilmenidine' OR 'rostafuroxin' OR 'sali aldopur' OR 'saralasin' OR 'saralasin acetate' OR 'selexipag' OR 'sildenafil' OR 'soquinolol' OR 'soquinolol mucate' OR 'spirgetine' OR 'syrosingopine' OR 'tadalafil' OR 'teclothiazide' OR 'terazosin' OR 'tiamenidine' OR 'tiamizide' OR 'tienilic acid' OR 'tienoxolol' OR 'tiodazosin' OR 'todralazine' OR 'torasemide' OR 'torrat' OR 'trasitensin' OR 'trepress' OR 'triamterene' OR 'triamterene plus xipamide' OR 'tribendilol' OR 'trichlormethiazide' OR 'trimazosin' OR 'trimetaphan' OR 'trimethidinium methosulfate' OR 'triniton' OR 'tripamide' OR 'uniprost' OR 'urapidil' OR 'verapamil' OR 'veratide' OR 'viskaldix' OR 'xipamide' |
| 36 | 33 OR 34 OR 35                                                                                                                                                                                                                                                                                                                                                                                                                                                                                                                                                                                                                                                                                                                                                                                                                                                                                                                                                                                                                                                                                                                                                                                                                                                                                                                                                                                                                                                                                                                                                                                                                                                                                                                                                                                                                                                                                                                                                                                                                                                                                                                                                                                                                                                                                                                                                                                                                                                                                                                                                                                                                                                                                                                                                                                                                                                                                                                                                                                                                                                                                                                                                                                                                                                                                                                                                                                                                                                                                                                                                                                                                                                                                                                                                                                                                                                                                                                                                                                                                                                                                                                                                                                                                                                                                                                                                                                                                                                                                                                                                                                                                                                                                                                                                                                                                                                                                                                                                                                                                                                           |
| 37 | 'angiotensin 1 receptor antagonist'                                                                                                                                                                                                                                                                                                                                                                                                                                                                                                                                                                                                                                                                                                                                                                                                                                                                                                                                                                                                                                                                                                                                                                                                                                                                                                                                                                                                                                                                                                                                                                                                                                                                                                                                                                                                                                                                                                                                                                                                                                                                                                                                                                                                                                                                                                                                                                                                                                                                                                                                                                                                                                                                                                                                                                                                                                                                                                                                                                                                                                                                                                                                                                                                                                                                                                                                                                                                                                                                                                                                                                                                                                                                                                                                                                                                                                                                                                                                                                                                                                                                                                                                                                                                                                                                                                                                                                                                                                                                                                                                                                                                                                                                                                                                                                                                                                                                                                                                                                                                                                      |
| 38 | 'angiotensin 1 receptor blocker' OR 'angiotensin 1 receptor blocking agent' OR 'angiotensin AT1 antagonist' OR 'angiotensin AT1 blocker' OR 'angiotensin AT1 blocking agent' OR 'angiotensin AT1 receptor antagonist' OR 'angiotensin AT1 receptor blocker' OR 'angiotensin AT1 receptor blocking agent' OR 'angiotensin II type 1 receptor antagonist' OR 'angiotensin II type 1 receptor blocker' OR 'angiotensin                                                                                                                                                                                                                                                                                                                                                                                                                                                                                                                                                                                                                                                                                                                                                                                                                                                                                                                                                                                                                                                                                                                                                                                                                                                                                                                                                                                                                                                                                                                                                                                                                                                                                                                                                                                                                                                                                                                                                                                                                                                                                                                                                                                                                                                                                                                                                                                                                                                                                                                                                                                                                                                                                                                                                                                                                                                                                                                                                                                                                                                                                                                                                                                                                                                                                                                                                                                                                                                                                                                                                                                                                                                                                                                                                                                                                                                                                                                                                                                                                                                                                                                                                                                                                                                                                                                                                                                                                                                                                                                                                                                                                                                      |

|    |                                                                                                                                                                                                                                                                                                                                                                                                                                                                                                                                                                                                                                                                                                                                                                                                                                                                                                                                                                                                                                                                                                                                                                                                                                                                                                                                                                                                                                                                                                                                                                                                                                                                                                                                                   |
|----|---------------------------------------------------------------------------------------------------------------------------------------------------------------------------------------------------------------------------------------------------------------------------------------------------------------------------------------------------------------------------------------------------------------------------------------------------------------------------------------------------------------------------------------------------------------------------------------------------------------------------------------------------------------------------------------------------------------------------------------------------------------------------------------------------------------------------------------------------------------------------------------------------------------------------------------------------------------------------------------------------------------------------------------------------------------------------------------------------------------------------------------------------------------------------------------------------------------------------------------------------------------------------------------------------------------------------------------------------------------------------------------------------------------------------------------------------------------------------------------------------------------------------------------------------------------------------------------------------------------------------------------------------------------------------------------------------------------------------------------------------|
|    | <p>II type 1 receptor blockers' OR 'angiotensin II type 1 receptor blocking agent' OR 'AT1 antagonist' OR 'AT1 blocker' OR 'AT1 blocking agent' OR 'AT1 receptor antagonist' OR 'AT1 receptor blocker' OR 'AT1 receptor blocking agent' OR 'AT1 antagonist' OR 'AT1 antagonists' OR 'AT1 blocker' OR 'AT1 blockers' OR 'AT1 blocking agent' OR 'AT1 blocking agents' OR 'AT1 receptor antagonist' OR 'AT1 receptor antagonists' OR 'AT1 receptor blocker' OR 'AT1 receptor blockers' OR 'AT1 receptor blocking agent' OR 'AT1 receptor blocking agents' OR 'Type 1 Angiotensin Receptor Antagonists' OR 'Type 1 Angiotensin Receptor Antagonist' OR 'Type 1 Angiotensin Receptor Blockers' OR 'Type 1 Angiotensin Receptor Blocker' OR 'Angiotensin II Type 1 Receptor Antagonists' OR 'Angiotensin II Type 1 Receptor Antagonist' OR 'Selective Angiotensin II Receptor Antagonists' OR 'Selective Angiotensin II Receptor Antagonist' OR 'Sartans'</p>                                                                                                                                                                                                                                                                                                                                                                                                                                                                                                                                                                                                                                                                                                                                                                                          |
| 39 | 37 OR 38                                                                                                                                                                                                                                                                                                                                                                                                                                                                                                                                                                                                                                                                                                                                                                                                                                                                                                                                                                                                                                                                                                                                                                                                                                                                                                                                                                                                                                                                                                                                                                                                                                                                                                                                          |
| 40 | 'aliskiren'                                                                                                                                                                                                                                                                                                                                                                                                                                                                                                                                                                                                                                                                                                                                                                                                                                                                                                                                                                                                                                                                                                                                                                                                                                                                                                                                                                                                                                                                                                                                                                                                                                                                                                                                       |
| 41 | <p>'5 amino n (2 carbamoyl 2 methylpropyl) 4 hydroxy 2 isopropyl 7 [4 methoxy 3 (3 methoxypropoxy) benzyl] 8 methylnonanamide' OR '5 amino n (2 carbamoyl 2 methylpropyl) 4 hydroxy 2 isopropyl 7 [4 methoxy 3 (3 methoxypropoxy) benzyl] 8 methylnonanamide hemifumarate' OR 'aliskiren fumarate' OR 'aliskiren hemifumarate' OR 'aliskiren hydrochloride' OR 'cgp 60536' OR 'cgp 60536b' OR 'cgp60536' OR 'cgp60536b' OR 'enviage' OR 'rasilez' OR 'riprazo' OR 'spp 100' OR 'spp 100b' OR 'spp100' OR 'spp100b' OR 'sprimeo' OR 'tekturna'</p>                                                                                                                                                                                                                                                                                                                                                                                                                                                                                                                                                                                                                                                                                                                                                                                                                                                                                                                                                                                                                                                                                                                                                                                                 |
| 42 | 40 OR 41                                                                                                                                                                                                                                                                                                                                                                                                                                                                                                                                                                                                                                                                                                                                                                                                                                                                                                                                                                                                                                                                                                                                                                                                                                                                                                                                                                                                                                                                                                                                                                                                                                                                                                                                          |
| 43 | <p>4 OR 8 OR 12 OR 16 OR 20 OR 24 OR 28 OR 32 OR 36 OR 39 OR 42<br/> ('random' OR 'random' OR 'randomly' OR 'randomed' OR 'randomer' OR 'randoms' OR 'randomlike' OR 'randomness' OR 'randomnesses' OR 'randomization' OR 'randomizations' OR 'randomize' OR 'randomized' OR 'randomizer' OR 'randomizes' OR 'randomizing' OR 'randomizingly' OR 'randomisation' OR 'randomisations' OR 'randomise' OR 'randomised' OR 'randomiser' OR 'randomises' OR 'randomising' OR 'randomisingly') OR (('placebo':ti OR 'placebo':ab OR 'placebo':de OR 'placebo':dd) OR ('placebos':ti OR 'placebos':ab OR 'placebos':de OR 'placebos':dd) OR ('placeboes':ti OR 'placeboes':ab OR 'placeboes':de OR 'placeboes':dd) OR ('placebo-controlled':ti OR 'placebo-controlled':ab OR 'placebo-controlled':de OR 'placebo-controlled':dd) OR ('placebo controlled':ti OR 'placebo controlled':ab OR 'placebo controlled':de OR 'placebo controlled':dd) OR ('placebogenic':ab OR 'placebogenic':de OR 'placebogenic':dd) OR ('placebogenics':ti OR 'placebogenics':ab OR 'placebogenics':de OR 'placebogenics':dd) OR ('placebolike':ti OR 'placebolike':ab OR 'placebolike':de OR 'placebolike':dd) OR ('placebo-like':ti OR 'placebo-like':ab OR 'placebo-like':de OR 'placebo-like':dd)) OR ('double blind' OR 'double-blinding' OR 'double blinding' OR 'double-blinded' OR 'double blinded' OR 'double-blindedly' OR 'double blindedly' OR 'double-blindedness' OR 'double blindedness' OR 'double-blindfold' OR 'double blindfold' OR 'double-blindfolded' OR 'double blindfolded' OR 'double-blinding' OR 'double blinding' OR 'double-blindly' OR 'double blindly' OR 'double-blindness' OR 'double blindness' OR 'double-blinds' OR 'double blinds')</p> |
| 44 | 43 AND 44                                                                                                                                                                                                                                                                                                                                                                                                                                                                                                                                                                                                                                                                                                                                                                                                                                                                                                                                                                                                                                                                                                                                                                                                                                                                                                                                                                                                                                                                                                                                                                                                                                                                                                                                         |
| 45 | 'sleep disordered breathing' OR ('sleep' AND 'apnea')                                                                                                                                                                                                                                                                                                                                                                                                                                                                                                                                                                                                                                                                                                                                                                                                                                                                                                                                                                                                                                                                                                                                                                                                                                                                                                                                                                                                                                                                                                                                                                                                                                                                                             |
| 46 | <p>((('mixed' OR 'central' OR 'obstructive') AND 'sleep')) OR 'central sleep apnea' OR 'central sleep apnea syndrome' OR 'central sleep apnoea' OR 'central sleep apnoea syndrome' OR 'hypersomnia with periodic respiration' OR 'mixed sleep apnea' OR 'mixed sleep apneas' OR 'mixed sleep apnoea' OR 'mixed sleep apnoeas' OR 'nocturnal apnea' OR 'nocturnal apnoea' OR 'obesity hypoventilation syndrome' OR 'obstructive sleep apnea' OR 'obstructive sleep apnea hypopnea syndrome' OR 'obstructive sleep apnea syndrome' OR 'obstructive sleep apnoea' OR 'obstructive sleep apnoea hypopnoea syndrome' OR 'obstructive sleep apnoea syndrome' OR 'pickwick syndrome' OR 'pickwickian syndrome' OR 'sleep apnea' OR 'sleep apneas' OR 'sleep apnea syndrome' OR 'sleep apnea syndromes' OR 'sleep apnoea' OR 'sleep apnoeas' OR 'sleep apnoea syndrome' OR 'sleep apnoea syndromes' OR 'sleep hypopnea' OR 'sleep hypopneas' OR 'sleep hypopnoea' OR 'sleep hypopnoeas' OR 'sleep-disordered breathing' OR 'sleep disordered breathing' OR 'mixed central and obstructive sleep apnea' OR 'mixed central and obstructive sleep apnoea' OR 'sleep-related breathing disorder' OR 'sleep-related breathing disorders' OR 'sleep related breathing disorder' OR 'sleep related breathing disorders' OR 'upper airway resistance syndrome'</p>                                                                                                                                                                                                                                                                                                                                                                                                |
| 47 | 'sa' OR 'osa' OR 'osas' OR 'ahi' OR 'sas' OR 'sahs' OR 'srbd' OR 'rdi'                                                                                                                                                                                                                                                                                                                                                                                                                                                                                                                                                                                                                                                                                                                                                                                                                                                                                                                                                                                                                                                                                                                                                                                                                                                                                                                                                                                                                                                                                                                                                                                                                                                                            |
| 48 | 'sleep' OR 'hypersomnia'                                                                                                                                                                                                                                                                                                                                                                                                                                                                                                                                                                                                                                                                                                                                                                                                                                                                                                                                                                                                                                                                                                                                                                                                                                                                                                                                                                                                                                                                                                                                                                                                                                                                                                                          |

|    |                                                                                                                                                                                                           |
|----|-----------------------------------------------------------------------------------------------------------------------------------------------------------------------------------------------------------|
| 49 | 52 AND 53                                                                                                                                                                                                 |
| 50 | ('apnea' OR 'apneas') OR ('apnaea' OR 'apnaeas') OR ('apnoe' OR 'apnoes') OR ('apnoea' OR 'apnoeas')                                                                                                      |
| 51 | ('hypopnea' OR 'hypopneas') OR ('hypopnaea' OR 'hypopnaeas') OR ('hypopnoe' OR 'hypopnoes') OR ('hypopnoea' OR 'hypopnoeas')                                                                              |
| 52 | ('apnea-hypopnea' OR 'apnea/hypopnea') OR ('apnaea-hypopnaea' OR 'apnaea/hypopnaea') OR ('apnoe-hypopnoe' OR 'apnoe/hypopnoe') OR ('apnoea-hypopnoea' OR 'apnoea/hypopnoea') OR 'respiratory disturbance' |
| 53 | 'index' OR 'syndrome'                                                                                                                                                                                     |
| 54 | 48 AND 49                                                                                                                                                                                                 |
| 55 | 'hypoxia' OR 'hypoxemia' OR 'hypoxaemia' OR 'repetitive hypoxemia' OR 'repetitive hypoxaemia' OR 'periodic respiration' OR 'respiratory disturbance'                                                      |
| 56 | 50 OR 51 OR 54 OR 55                                                                                                                                                                                      |
| 57 | 49 AND 56                                                                                                                                                                                                 |
| 58 | 45 OR 46 OR 57                                                                                                                                                                                            |
| 59 | 'risk' OR ('mortality' OR 'mortalities' OR 'mortalities') OR 'cohort'                                                                                                                                     |
| 60 | 58 AND 59                                                                                                                                                                                                 |
| 61 | 44 AND 60                                                                                                                                                                                                 |

## Embase.com search strategy 2 (2013, 2014)

| # | Search strategy                                                                                                                                                                                                                                                                                                                                                                                                                                                                                                                                                                                                                                                                                                                                                                                                                                                                                                                                                                                                                                                                                                                                                                                                                                                                                                                                                                                                                                                                                                                                                                                                                                                                                                                                                                                                             |
|---|-----------------------------------------------------------------------------------------------------------------------------------------------------------------------------------------------------------------------------------------------------------------------------------------------------------------------------------------------------------------------------------------------------------------------------------------------------------------------------------------------------------------------------------------------------------------------------------------------------------------------------------------------------------------------------------------------------------------------------------------------------------------------------------------------------------------------------------------------------------------------------------------------------------------------------------------------------------------------------------------------------------------------------------------------------------------------------------------------------------------------------------------------------------------------------------------------------------------------------------------------------------------------------------------------------------------------------------------------------------------------------------------------------------------------------------------------------------------------------------------------------------------------------------------------------------------------------------------------------------------------------------------------------------------------------------------------------------------------------------------------------------------------------------------------------------------------------|
| 1 | 'hypertension'                                                                                                                                                                                                                                                                                                                                                                                                                                                                                                                                                                                                                                                                                                                                                                                                                                                                                                                                                                                                                                                                                                                                                                                                                                                                                                                                                                                                                                                                                                                                                                                                                                                                                                                                                                                                              |
| 2 | 'hypertension' OR ('antihypertensive' OR 'anti-hypertensive' OR 'anti hypertensive') OR 'ht' OR 'htn' OR 'acute hypertension' OR 'arterial hypertension' OR 'cardiovascular hypertension' OR 'controlled hypertension' OR 'endocrine hypertension' OR 'high blood pressure' OR 'high renin hypertension' OR 'hypertensive disease' OR 'hypertensive effect' OR 'hypertensive response' OR 'increased blood pressure' OR 'neurogenic hypertension' OR 'preexistent hypertension' OR 'refractory hypertension' OR 'salt high blood pressure' OR 'salt hypertension' OR 'secondary hypertension' OR 'systemic hypertension'                                                                                                                                                                                                                                                                                                                                                                                                                                                                                                                                                                                                                                                                                                                                                                                                                                                                                                                                                                                                                                                                                                                                                                                                    |
| 3 | ('blood pressure' NEAR/3 'high') OR ('blood pressure' NEAR/3 'elevated') OR ('bp' NEAR/3 'high') OR ('bp' NEAR/3 'elevated')                                                                                                                                                                                                                                                                                                                                                                                                                                                                                                                                                                                                                                                                                                                                                                                                                                                                                                                                                                                                                                                                                                                                                                                                                                                                                                                                                                                                                                                                                                                                                                                                                                                                                                |
| 4 | 1 OR 2 OR 3                                                                                                                                                                                                                                                                                                                                                                                                                                                                                                                                                                                                                                                                                                                                                                                                                                                                                                                                                                                                                                                                                                                                                                                                                                                                                                                                                                                                                                                                                                                                                                                                                                                                                                                                                                                                                 |
| 5 | 'diuretic agent'                                                                                                                                                                                                                                                                                                                                                                                                                                                                                                                                                                                                                                                                                                                                                                                                                                                                                                                                                                                                                                                                                                                                                                                                                                                                                                                                                                                                                                                                                                                                                                                                                                                                                                                                                                                                            |
| 6 | '2 [4 (3 aminomethyl 4 hydroxybenzoyl) 2, 3 dichlorophenoxy] acetic acid ethyl ester' OR '2, 4 dihydro 6, 8 dinitro 1, 2, 4 triazolo [3, 4 c] [1, 4] benzoxazin 1 one' OR '2 aminomethyl 4 tert butyl 6 iodophenol' OR '3, 5 diamino 6 chloro n [1 [n [2 [2 hydroxy 3 (1 naphthoxy) propylamino] ethyl] carbamoyl] 1 methylethyl] pyrazine 2 carboxamide' OR '4 anilino 2 methylthiopyrido [2, 3 d] pyrimidine' OR '[[5 chloro 3 (2 methylphenyl) 4 oxo 4h benzopyran 7 yl] oxy] acetic acid' OR '8 chloro 1 [alpha (2 dimethylaminoethyl) benzyl] 6 phenyl 4h 1, 2, 4 triazolo [4, 3 a] [1, 4] benzodiazepine' OR '8 chloro 3 (2 fluorophenyl) 5, 6 dihydrofuro [3, 2 f] [1, 2] benzisoxazole 6 carboxylate potassium' OR 'acetazolamide' OR 'alilusem' OR 'amisometradine' OR 'ammonium acetate' OR 'ascorbic acid plus mannitol hexanitrate plus reserpine plus rutoside plus theophylline' OR 'bemitradine' OR 'besulpamide' OR 'betaine plus mersalyl plus theophylline' OR 'brocricin' OR 'chlormerodrin' OR 'diclofenamide' OR 'ectylurea plus ethoxzolamide plus medroxyprogesterone acetate' OR 'ephedrine plus phenobarbital plus prednisone plus theophylline' OR 'epinine' OR 'ethoxzolamide' OR 'fenquizone' OR 'guaifenesin plus theophylline' OR 'homatropine methyl bromide plus hyoscyamine plus mepyramine maleate plus methamphetamine plus pamabrom plus scopolamine bromide' OR 'ibopamine' OR 'indapamide' OR 'indapamide plus perindopril' OR 'loop diuretic agent' OR 'mepyramine maleate plus pamabrom' OR 'mepyramine maleate plus pamabrom plus phenacetin plus salicylamide' OR 'meralluride' OR 'mercaptomerin' OR 'mercumatilin' OR 'merethoxylline' OR 'merethoxylline plus theophylline' OR 'mersalyl' OR 'mersalyl plus theophylline' OR 'methazolamide' OR 'meticrane' OR 'niravoline' OR |

|   |                                                                                                                                                                                                                                                                                                                                                                                                                                                                                                                                                                                                                                                                                                                                                                                                                                                                                                                                                                                                                                                                                                                                                                                                                                                                                                                                                                                                                                                                                                                                                                                                                                                                                                                                                                                                                                                                                                                                                                                                                                                                                                                                                                                                                                                                                                                                                                                                                                                                                                                                                                                                                                                                                                                                                                                                                                                                                                                                                                                                                                                                                                                                                                                                                                                                                                                                                                                                                                                                                                                                                                                                                                                                                                                                                                                                                                                                                                                                                                                                                                                                                                                                                                                                                                                                                                                                                                                                                                                                                                                                                                                                                                                                                                                                                                 |
|---|-----------------------------------------------------------------------------------------------------------------------------------------------------------------------------------------------------------------------------------------------------------------------------------------------------------------------------------------------------------------------------------------------------------------------------------------------------------------------------------------------------------------------------------------------------------------------------------------------------------------------------------------------------------------------------------------------------------------------------------------------------------------------------------------------------------------------------------------------------------------------------------------------------------------------------------------------------------------------------------------------------------------------------------------------------------------------------------------------------------------------------------------------------------------------------------------------------------------------------------------------------------------------------------------------------------------------------------------------------------------------------------------------------------------------------------------------------------------------------------------------------------------------------------------------------------------------------------------------------------------------------------------------------------------------------------------------------------------------------------------------------------------------------------------------------------------------------------------------------------------------------------------------------------------------------------------------------------------------------------------------------------------------------------------------------------------------------------------------------------------------------------------------------------------------------------------------------------------------------------------------------------------------------------------------------------------------------------------------------------------------------------------------------------------------------------------------------------------------------------------------------------------------------------------------------------------------------------------------------------------------------------------------------------------------------------------------------------------------------------------------------------------------------------------------------------------------------------------------------------------------------------------------------------------------------------------------------------------------------------------------------------------------------------------------------------------------------------------------------------------------------------------------------------------------------------------------------------------------------------------------------------------------------------------------------------------------------------------------------------------------------------------------------------------------------------------------------------------------------------------------------------------------------------------------------------------------------------------------------------------------------------------------------------------------------------------------------------------------------------------------------------------------------------------------------------------------------------------------------------------------------------------------------------------------------------------------------------------------------------------------------------------------------------------------------------------------------------------------------------------------------------------------------------------------------------------------------------------------------------------------------------------------------------------------------------------------------------------------------------------------------------------------------------------------------------------------------------------------------------------------------------------------------------------------------------------------------------------------------------------------------------------------------------------------------------------------------------------------------------------------------------------|
|   | 'osmotic diuretic agent' OR 'pamabrom' OR 'pamabrom plus paracetamol plus phenindamine' OR 'pamabrom plus phenacetin' OR 'pamabrom plus phenacetin plus salicylamide' OR 'perhexiline' OR 'perhexiline maleate' OR 'phenobarbital plus Rauwolfia alkaloid plus theobromine' OR 'phenobarbital plus reserpine plus theobromine' OR 'phenobarbital plus theobromine calcium salicylate' OR 'potassium iodide plus theophylline' OR 'potassium sparing diuretic agent' OR 'sali aldopur' OR 'sitalidone' OR 'skf 105494' OR 'theobromine' OR 'theobromine calcium salicylate' OR 'theophylline' OR 'thiazide diuretic agent' OR 'tiamizide' OR 'tienilic acid' OR 'tienoxolol' OR 'traxanox' OR 'triamterene plus xipamide' OR 'triniton' OR 'tripamide' OR 'viskaldix'                                                                                                                                                                                                                                                                                                                                                                                                                                                                                                                                                                                                                                                                                                                                                                                                                                                                                                                                                                                                                                                                                                                                                                                                                                                                                                                                                                                                                                                                                                                                                                                                                                                                                                                                                                                                                                                                                                                                                                                                                                                                                                                                                                                                                                                                                                                                                                                                                                                                                                                                                                                                                                                                                                                                                                                                                                                                                                                                                                                                                                                                                                                                                                                                                                                                                                                                                                                                                                                                                                                                                                                                                                                                                                                                                                                                                                                                                                                                                                                            |
| 7 | 5 OR 6                                                                                                                                                                                                                                                                                                                                                                                                                                                                                                                                                                                                                                                                                                                                                                                                                                                                                                                                                                                                                                                                                                                                                                                                                                                                                                                                                                                                                                                                                                                                                                                                                                                                                                                                                                                                                                                                                                                                                                                                                                                                                                                                                                                                                                                                                                                                                                                                                                                                                                                                                                                                                                                                                                                                                                                                                                                                                                                                                                                                                                                                                                                                                                                                                                                                                                                                                                                                                                                                                                                                                                                                                                                                                                                                                                                                                                                                                                                                                                                                                                                                                                                                                                                                                                                                                                                                                                                                                                                                                                                                                                                                                                                                                                                                                          |
| 8 | 'alpha adrenergic receptor blocking agent'                                                                                                                                                                                                                                                                                                                                                                                                                                                                                                                                                                                                                                                                                                                                                                                                                                                                                                                                                                                                                                                                                                                                                                                                                                                                                                                                                                                                                                                                                                                                                                                                                                                                                                                                                                                                                                                                                                                                                                                                                                                                                                                                                                                                                                                                                                                                                                                                                                                                                                                                                                                                                                                                                                                                                                                                                                                                                                                                                                                                                                                                                                                                                                                                                                                                                                                                                                                                                                                                                                                                                                                                                                                                                                                                                                                                                                                                                                                                                                                                                                                                                                                                                                                                                                                                                                                                                                                                                                                                                                                                                                                                                                                                                                                      |
| 9 | '1 (2 ethoxy 2 (3 pyridyl) ethyl) 4 (2 methoxyphenyl) piperazine' OR '1 (2 pyrimidinyl) piperazine' OR '1, 3, 4, 5, 6, 6, 7, 12b octahydro 1, 3 dimethyl 2h spiro (benzo (b) furo (2, 3 a) quinolizine 2, 4 pyrimidine) 2' one' OR '1 (4 amino 6, 7 dimethoxy 2 quinazoliny) 4 (bicyclo (2.2.2) octa 2, 5 dien 2 ylcarbonyl) piperazine' OR '1, 4 dihydro 2, 6 dimethyl 4 (3 nitrophenyl) 3, 5 pyridinedicarboxylic acid 2 (n (2, 3 dihydro 1, 4 benzodioxin 2 yl) n methylamino) ethyl methyl ester' OR '1, 4 dihydro 2, 6 dimethyl 4 (4 nitrophenyl) 3, 5 pyridinedicarboxylic acid (3 (4, 4 diphenyl 1 piperidinyl) propyl) amide methyl ester' OR '12 ethylsulfonyl 5, 8, 8a, 9, 10, 11, 12, 12a, 13, 13a decahydro 3 methoxy 6h isoquino (2, 1 g) (1, 6) naphthyridine' OR '14alpha hydroxy 7, 8 methylenedioxyalloberbane' OR '2 (1 methyl 2 isoindolinylmethyl) 2 imidazoline' OR '2 ((2 (2, 6 dimethoxyphenoxy) ethyl) aminomethyl) 101, 4 benzodioxan' OR '2 (2 (3, 4 dimethoxyphenyl) ethyl) amino 1 (2, 6 dimethylphenoxy) pr110pane' OR '2 (2 (4 (2 methoxyphenyl) 1 piperaziny) ethyl) 4, 4 dimethyl 1, 3 (2h, 4h) isoquinolinedione' OR '2 ((2 (4 hydroxy 3 iodophenyl) ethyl) aminomethyl) tetralone' OR '2 (2 (4 hydroxyphenyl) ethylaminomethyl) tetralone' OR '2 (2 ethoxy 1, 4 benzodioxan 2 yl) 2 imidazoline' OR '2 (2 methoxy 1, 4 benzodioxan 2 yl) 2 imidazoline' OR '2 (3 ((2 benzo (1, 4) dioxanyl) methylamino) propyl) 3 (2h) pyridazinone' OR '2, 3, 9, 13b tetrahydro 1, 2 dimethyl 1h imidazo (3, 4 f) morphanthridine' OR '2 ((4 (4 (2 methoxyphenyl) 1 piperaziny) butyl) amino) 4, 6 dimethyl 5 pyrimidinecarboxylic acid ethyl ester' OR '2, 4, 6 trihydroxy 4 (1 pyrrolidinyl) butyrophenone' OR '2 (5 chloro 2 isoindolinylmethyl) 2 imidazoline' OR '2 bromo n (2 chloroethyl) n ethylbenzylamine' OR '2 ethoxy 1 (2h) quinolinecarboxylic acid ethyl ester' OR '3 (2 (4 (2 methoxyphenyl) 1 piperaziny) ethyl) 2, 4 (1h, 3h) quinazolinedione' OR '3 (n (2 (4 hydroxy 2 isopropyl 5 methylphenoxy) ethyl) n methylaminomethyl) 4 methoxy 2, 5, 6 trimethylphenol' OR '4 chloro 2 (2 imidazolin 2 ylamino) isoindoline' OR '4 chloro 6 isopropylamino 2 (4 methyl 1 piperaziny) 5 (methylsulfinyl) pyrimidine' OR '4 chloro 6 isopropylamino 5 methyl 2 (1 piperaziny) pyrimidine' OR '4 chloro 6 isopropylamino 5 methyl 2 (4 methyl 1 piperaziny) pyrimidine' OR '4 chloro 6 isopropylamino 5 methylthio 2 (1 piperaziny) pyrimidine' OR '4 hydroxy 2, 6 dimethoxy 4 pyrrolidinobutyrophenone' OR '4 tert butylamino 6 chloro 2 (4 methyl 1 piperaziny) 5 (methylthio) pyrimidine' OR '5 acetyl 2 ((2 (4 (2 methoxyphenyl) 1 piperaziny) ethyl) amino) 4, 6 dimethylpyrimidine' OR '5 bromo 4 chloro 6 isopropylamino 2 (1 piperaziny) pyrimidine' OR '5 chloro n (2 (2 cyclopropylmethoxyphenoxy) ethyl) alpha, alpha dimethyl 1h indole 3 ethanamine' OR '5 formylurapidil' OR '5 methylurapidil' OR '6 chloro 2, 3, 4, 5 tetrahydro 3 methyl 1h 3 benzazepine' OR '6 chloro 2, 3, 4, 5 tetrahydro 3 methyl 9 (3 methyl 2 butenyloxy) 1h 3 benzazepine' OR '7 chloro 3, 4, 5, 6 tetrahydro 4 methyl 2 vinylthieno (4, 3, 2 ef) (3) benzazepine' OR '8 (2 (4 (2 methoxyphenyl) 1 piperaziny) ethyl) 8 azaspiro (4.5) decane 7, 9 dione' OR '9 allyloxy 6 chloro 2, 3, 4, 5 tetrahydro 3 methyl 1h benzazepine' OR 'abanoquil' OR 'adimolol' OR 'alfuzosin' OR 'alpha 1 adrenergic receptor blocking agent' OR 'alpha 2 adrenergic receptor blocking agent' OR 'alpha ethyl 3, 4, 5 trimethoxy alpha (3 ((2 (2 methoxyphenoxy) ethyl) amino) propyl) benzeneacetonitrile fumarate' OR 'amosulalol' OR 'aptazapine' OR 'aptazapine maleate' OR 'atipamezole' OR 'belladonna alkaloid plus ergotamine tartrate plus phenobarbital' OR 'bellerгал' OR 'benextramine' OR 'benoxathian' OR 'bufloxedil' OR 'bunazosin' OR 'cafergot' OR 'caffeine plus cyclizine plus ergotamine tartrate' OR 'caffeine plus ergotamine tartrate' OR 'cervilan' OR 'chloroethylclonidine' OR 'dapiprazole' OR 'defluina' OR 'delequamine' OR 'derigidole' OR 'dibenamine' OR 'dihydrobenzoperidol' OR 'dihydroergocornine' OR 'dihydroergocristine' OR 'dihydroergocristine methanesulfonate' OR 'dihydroergocryptine' OR 'dihydroergotamine' OR 'dihydroergotamine mesilate' OR 'dihydroergotamine mesilate plus heparin plus lidocaine' OR 'dihydroergotamine' OR 'dihydroergotamine mesilate' OR 'doxazosin' OR 'doxazosin mesylate' OR 'dutasteride plus tamsulosin' OR 'efaroxan' OR 'embolex' OR 'ergocornine' OR 'ergocristine' OR 'ergocryptine' OR 'ergot alkaloid' OR 'ergot derivative' OR 'ergotamine' OR 'ergotamine tartrate' OR 'ergotamine' OR 'fenspiride' OR 'fiduxosin' OR 'fipamezole' OR 'fluparoxan' OR 'hexamethonium |

|    |                                                                                                                                                                                                                                                                                                                                                                                                                                                                                                                                                                                                                                                                                                                                                                                                                                                                                                                                                                                                                                                                                                                                                                                                                                                                                                                                                                                                                                                                                                                                                                                                                                                                                                                                                                                                                                                                                                                                                                                                                                                                                                                                                                                                                                                                                                                                                                                                                                                                                                                                                                                                                                                                                                                                                                                                                                                                                                                                                                                                                                                                                                                                                                                                                                                                                                                                                                                                                                                                                                                                                                                                                                                                                                                                                                                                                                                                                                                                                                                                                                                                                                                                                                                                                |
|----|----------------------------------------------------------------------------------------------------------------------------------------------------------------------------------------------------------------------------------------------------------------------------------------------------------------------------------------------------------------------------------------------------------------------------------------------------------------------------------------------------------------------------------------------------------------------------------------------------------------------------------------------------------------------------------------------------------------------------------------------------------------------------------------------------------------------------------------------------------------------------------------------------------------------------------------------------------------------------------------------------------------------------------------------------------------------------------------------------------------------------------------------------------------------------------------------------------------------------------------------------------------------------------------------------------------------------------------------------------------------------------------------------------------------------------------------------------------------------------------------------------------------------------------------------------------------------------------------------------------------------------------------------------------------------------------------------------------------------------------------------------------------------------------------------------------------------------------------------------------------------------------------------------------------------------------------------------------------------------------------------------------------------------------------------------------------------------------------------------------------------------------------------------------------------------------------------------------------------------------------------------------------------------------------------------------------------------------------------------------------------------------------------------------------------------------------------------------------------------------------------------------------------------------------------------------------------------------------------------------------------------------------------------------------------------------------------------------------------------------------------------------------------------------------------------------------------------------------------------------------------------------------------------------------------------------------------------------------------------------------------------------------------------------------------------------------------------------------------------------------------------------------------------------------------------------------------------------------------------------------------------------------------------------------------------------------------------------------------------------------------------------------------------------------------------------------------------------------------------------------------------------------------------------------------------------------------------------------------------------------------------------------------------------------------------------------------------------------------------------------------------------------------------------------------------------------------------------------------------------------------------------------------------------------------------------------------------------------------------------------------------------------------------------------------------------------------------------------------------------------------------------------------------------------------------------------------------------|
|    | chloride plus Rauwolfia alkaloid' OR 'idazoxan' OR 'ifenprodil' OR 'ifenprodil tartrate' OR 'imiloxan' OR 'indoramin' OR 'isaglidole' OR 'isaglidole maleate' OR 'metazosin' OR 'midaglizole' OR 'mirtazapine' OR 'n (1, 2, 3, 4, 6, 7 hexahydro 11h benzo (a) quinolizin 2 yl) n methylmethanesulfonamide' OR 'n (1, 3, 4, 6, 7, 11balpha hexahydro 2h benzo (a) quinolizin 2beta yl) n methyl 1 propanesulfonamide' OR 'n (1, 3, 4, 6, 7, 11balpha hexahydro 2h benzo (a) quinolizin 2beta yl) n methylisobutanesulfonamide' OR 'n (1, 3, 4, 6, 7, 12b hexahydro 2h benzo (b) furo (2, 3 a) quinolizin 2 yl) 2 hydroxy n methylethanesulfonamide' OR 'n (2 (1, 3, 4, 6, 7, 12b hexahydro 2` oxospiro (2h benzofuro (2, 3 a) quinolizine 2, 4` imidazolidin) 3` yl) ethyl) methanesulfonamide' OR 'naftopidil' OR 'napamezole' OR 'napitane' OR 'neldazosin' OR 'pentaerythrityl tetranitrate plus Rauwolfia alkaloid' OR 'phenobarbital plus Rauwolfia alkaloid plus theobromine' OR 'phenoxybenzamine' OR 'phentolamine' OR 'phentolamine mesylate' OR 'piperoxan' OR 'polythiazide plus prazosin' OR 'pontuc' OR 'prazosin' OR 'proroxan' OR 'proxodolol' OR 'Rauwolfia alkaloid' OR 'rauwolscine' OR 'saterinone' OR 'silodosin' OR 'sunepitron' OR 'tamsulosin' OR 'taprizosin' OR 'terazosin' OR 'tiodazosin' OR 'tolazoline' OR 'tonopan' OR 'trazodone' OR 'trimazosin' OR 'upidosin' OR 'urapidil' OR 'wb 4104' OR 'wigraine' OR 'yohimbine'                                                                                                                                                                                                                                                                                                                                                                                                                                                                                                                                                                                                                                                                                                                                                                                                                                                                                                                                                                                                                                                                                                                                                                                                                                                                                                                                                                                                                                                                                                                                                                                                                                                                                                                                                                                                                                                                                                                                                                                                                                                                                                                                                                                                                                                                                                                                                                                                                                                                                                                                                                                                                                                                                                                                                         |
| 10 | 8 OR 9                                                                                                                                                                                                                                                                                                                                                                                                                                                                                                                                                                                                                                                                                                                                                                                                                                                                                                                                                                                                                                                                                                                                                                                                                                                                                                                                                                                                                                                                                                                                                                                                                                                                                                                                                                                                                                                                                                                                                                                                                                                                                                                                                                                                                                                                                                                                                                                                                                                                                                                                                                                                                                                                                                                                                                                                                                                                                                                                                                                                                                                                                                                                                                                                                                                                                                                                                                                                                                                                                                                                                                                                                                                                                                                                                                                                                                                                                                                                                                                                                                                                                                                                                                                                         |
| 11 | 'calcium channel blocking agent'                                                                                                                                                                                                                                                                                                                                                                                                                                                                                                                                                                                                                                                                                                                                                                                                                                                                                                                                                                                                                                                                                                                                                                                                                                                                                                                                                                                                                                                                                                                                                                                                                                                                                                                                                                                                                                                                                                                                                                                                                                                                                                                                                                                                                                                                                                                                                                                                                                                                                                                                                                                                                                                                                                                                                                                                                                                                                                                                                                                                                                                                                                                                                                                                                                                                                                                                                                                                                                                                                                                                                                                                                                                                                                                                                                                                                                                                                                                                                                                                                                                                                                                                                                               |
| 12 | '1 (2 (4 methoxyphenyl) 2 (3 (4 methoxyphenyl) propoxy) ethyl) 1h imidazole' OR '1 (2 (n benzyl 3, 4 methylenedioxyanilino) 1 (isobutoxymethyl) ethyl) pyrrolidine' OR '1` (4, 4 bis (3 fluorophenyl) butyl) 7 fluoro 2 methylspiro (2h 1, 4 benzodioxepin 3 (5h) 4` piperidine)' OR '1, 4 dihydro 2 (1 imidazolylmethyl) 6 methyl 4 (3 nitrophenyl) 3, 5 pyridinedicarboxylic acid 3 ethyl 5 methyl ester' OR '1, 4 dihydro 2, 6 dimethyl 4 (2 nitrophenyl) 5 (2 oxo 1, 3, 2 dioxaphosphorinan 2 yl) 3 pyridinecarboxylic acid methyl ester' OR '1, 4 dihydro 2, 6 dimethyl 4 (2 trifluoromethylphenyl) 3, 5 pyridinedicarboxylic acid diethyl ester' OR '1, 4 dihydro 2, 6 dimethyl 4 (3 nitrophenyl) 3, 5 pyridinedicarboxylic acid 2 iodoethyl isopropyl ester' OR '1, 4 dihydro 2, 6 dimethyl 4 (3 nitrophenyl) 3, 5 pyridinedicarboxylic acid 2 (n (2, 3 dihydro 1, 4 benzodioxin 2 yl) n methylamino) ethyl methyl ester' OR '1, 4 dihydro 2, 6 dimethyl 4 (3 nitrophenyl) 3, 5 pyridinedicarboxylic acid 2 nitratopropyl 3 nitratopropyl ester' OR '1, 4 dihydro 2, 6 dimethyl 4 (3 nitrophenyl) 3, 5 pyridinedicarboxylic acid 3 (2 (4 (3, 4 dichlorophenyl) 1 piperazinyl) ethyl) 5 methyl ester' OR '1, 4 dihydro 2, 6 dimethyl 4 (3 nitrophenyl) 3, 5 pyridinedicarboxylic acid 3 (2 nicotinamidoethyl) 5 (3 nitrooxypropyl) ester' OR '1, 4 dihydro 2, 6 dimethyl 4 (3 nitrophenyl) 3, 5 pyridinedicarboxylic acid (3 (4 (2 methoxyphenyl) 1 piperazinyl) propyl) methyl ester' OR '1, 4 dihydro 2, 6 dimethyl 4 (3 nitrophenyl) 3, 5 pyridinedicarboxylic acid 3 methyl 5 (6 (5 phenyl 3 pyrazolyloxy) hexyl) ester' OR '1, 4 dihydro 2, 6 dimethyl 4 (3 nitrophenyl) 3, 5 pyridinedicarboxylic acid (4 (2, 3 dihydroxypropoxy) phenethyl) methyl ester' OR '1, 4 dihydro 2, 6 dimethyl 4 (3 nitrophenyl) 3, 5 pyridinedicarboxylic acid dimethyl ester' OR '1, 4 dihydro 2, 6 dimethyl 5 nitro 4 (2 (trifluoromethyl) phenyl) 3 pyridinecarboxylic acid methyl ester' OR '1, 4 dihydro 2, 6 dimethyl 5 nitro 4 (thieno (3, 2 c) pyridin 3 yl) 3 pyridinecarboxylic acid 1 phenylethyl ester' OR '1, 4 dihydro 5 ((3 (4 (2 methoxyphenyl) 1 piperazinyl) propyl) carbamoyl) 2, 6 dimethyl 4 (3 nitrophenyl) 3 pyridinecarboxylic acid methyl ester' OR '1, 4 dihydro 5 isopropoxy 2 methyl 4 (2 trifluoromethylphenyl) 1, 6 naphthyridine 3 carboxylic acid ethyl ester' OR '2 ((2 ((3 amino 1h 1, 2, 4 triazol 5 yl) amino) ethoxy) methyl) 4 (2, 3 dichlorophenyl) 1, 4 dihydro 6 methyl 3, 5 pyridinedicarboxylic acid 3 ethyl 5 methyl ester' OR '2 (2, 5 dimethoxybenzyl) 3 (2 dimethylaminoethyl) 6 isopropoxy 4 (3h) quinazolinone' OR '2 ((2 amino 6 hydroxy 4 pyrimidinyl) methoxymethyl) 4 (2, 3 dichlorophenyl) 1, 4 dihydro 6 methyl 3, 5 pyridinedicarboxylic acid 3 ethyl 5 methyl ester' OR '2 (2 (carbamoylmethylamino) ethoxymethyl) 4 (2 chlorophenyl) 1, 4 dihydro 6 methyl 3, 5 pyridinedicarboxylic acid 3 ethyl 5 methyl ester' OR '2 (2 formamidoethylthiomethyl) 1, 4 dihydro 6 methyl 4 (3 nitrophenyl) 3, 5 pyridinedicarboxylic acid 3 ethyl 5 methyl ester' OR '2 (3, 4 dichlorophenyl) 5 ((3, 4 dimethoxyphenethyl) (methyl) amino) 2 isopropylvaleronitrile' OR '2 (3, 5 di tert butyl 4 hydroxyphenyl) 3 (3 (n methyl n (2 (3, 4 methylenedioxyphenoxy) ethyl) amino) propyl) 4 thiazolidinone' OR '2 (4 (3 (n (3, 4 dimethoxyphenethyl) n methylamino) propoxy) benzenesulfonyl) 3 isopropyl 1 methylindole' OR '2 (4 dimethylaminostyryl) 1 methylpyridinium iodide' OR '2 aminoethoxydiphenylborane' OR '2 cyclohexyl 2 hydroxy 2 phenylacetic acid 4 ethylamino 1, 1 dimethyl 2 butynyl ester' OR '3, 4, 5 trimethoxybenzoic acid 8 (diethylamino) octyl ester' OR '3 (4 cyano 4 (3, 4 dimethoxyphenyl) 5 methylhexyl) 1, 2, 3, 4 tetrahydro 6, 7 dimethoxy 2 methylisoquinoline' OR '3, 4 dihydro 2, 6 dimethyl 4 (2 nitrophenyl) 3, 5 pyrimidinedicarboxylic acid 3 (2 (n benzyl n (2 naphthylmethyl) amino) ethyl) 5 isopropyl ester' OR '3, 4 dihydro 2, 6 dimethyl 4 (2 nitrophenyl) 3, 5 pyrimidinedicarboxylic acid 3 (2 (n benzyl n (3, 4 dichlorobenzyl) amino) ethyl) 5 isopropyl ester' OR '3, 4 dihydro 2 isopropyl 4 methyl 2 (2 (4 (4 (2 (3, 4, |

|    |                                                                                                                                                                                                                                                                                                                                                                                                                                                                                                                                                                                                                                                                                                                                                                                                                                                                                                                                                                                                                                                                                                                                                                                                                                                                                                                                                                                                                                                                                                                                                                                                                                                                                                                                                                                                                                                                                                                                                                                                                                                                                                                                                                                                                                                                                                                                                                                                                                                                                                                                                                                                                                                                                                                                                                                                                                                                                                                                                                                                                                                                                                                                                                                                                                                                                                                                                                                                                                                                                                                                                                                                                                                                                                                                                                                                                                                                                                                                                                                                                                                                                                                                                                                                                                                                                                                                                                                                                                                                                                                                                                                                                                                                                                                                                                                                                                                                                                                                                                                                                                                                                                                                                                                                                                                                    |
|----|--------------------------------------------------------------------------------------------------------------------------------------------------------------------------------------------------------------------------------------------------------------------------------------------------------------------------------------------------------------------------------------------------------------------------------------------------------------------------------------------------------------------------------------------------------------------------------------------------------------------------------------------------------------------------------------------------------------------------------------------------------------------------------------------------------------------------------------------------------------------------------------------------------------------------------------------------------------------------------------------------------------------------------------------------------------------------------------------------------------------------------------------------------------------------------------------------------------------------------------------------------------------------------------------------------------------------------------------------------------------------------------------------------------------------------------------------------------------------------------------------------------------------------------------------------------------------------------------------------------------------------------------------------------------------------------------------------------------------------------------------------------------------------------------------------------------------------------------------------------------------------------------------------------------------------------------------------------------------------------------------------------------------------------------------------------------------------------------------------------------------------------------------------------------------------------------------------------------------------------------------------------------------------------------------------------------------------------------------------------------------------------------------------------------------------------------------------------------------------------------------------------------------------------------------------------------------------------------------------------------------------------------------------------------------------------------------------------------------------------------------------------------------------------------------------------------------------------------------------------------------------------------------------------------------------------------------------------------------------------------------------------------------------------------------------------------------------------------------------------------------------------------------------------------------------------------------------------------------------------------------------------------------------------------------------------------------------------------------------------------------------------------------------------------------------------------------------------------------------------------------------------------------------------------------------------------------------------------------------------------------------------------------------------------------------------------------------------------------------------------------------------------------------------------------------------------------------------------------------------------------------------------------------------------------------------------------------------------------------------------------------------------------------------------------------------------------------------------------------------------------------------------------------------------------------------------------------------------------------------------------------------------------------------------------------------------------------------------------------------------------------------------------------------------------------------------------------------------------------------------------------------------------------------------------------------------------------------------------------------------------------------------------------------------------------------------------------------------------------------------------------------------------------------------------------------------------------------------------------------------------------------------------------------------------------------------------------------------------------------------------------------------------------------------------------------------------------------------------------------------------------------------------------------------------------------------------------------------------------------------------------------------|
|    | <p>5 trimethoxyphenyl) ethyl) piperazinyl) butoxy) phenyl) 2h 1, 4 benzothiazin 3 one' OR '3 acetoxy 1 (2 (dimethylamino) ethyl) 1, 3, 4, 5 tetrahydro 4 (4 methoxyphenyl) 6 trifluoromethyl 2h 1 benzazepin 2 one' OR '3 acetyl 2 (5 methoxy 2 (4 (n methyl n (3, 4, 5 trimethoxyphenethyl) amino) butoxy) phenyl) benzothiazoline' OR '4 (2, 3 dichlorophenyl) 1, 4 dihydro 2, 6 dimethyl 3, 5 pyridinedicarboxylic acid isopropyl methyl ester' OR '4 (3 (4 (4, 4' difluoro alpha hydroxybenzhydryl) piperidino) propoxy) alpha, alpha dimethylacetophenone' OR '4 (3 (4 (4, 4' difluorobenzhydryl) 1 piperidyl) propoxy) 3 methoxyacetophenone mandelate' OR '4 (3 chloro 6 fluoro 2 (trifluoromethyl) phenyl) 2 fluoromethyl 1, 4 dihydro 6 methyl 3, 5 pyridinedicarboxylic acid 3 methyl 5 isopropyl ester' OR '4, 7 dihydro 3 isobutyl 6 methyl 4 (3 nitrophenyl) thieno (2, 3 b) pyridine 5 carboxylic acid methyl ester' OR '5 cyano 1, 4 dihydro 6 methyl 2 (4 pyridylsulfonylmethyl) 4 (2 (trifluoromethyl) phenyl) 3 pyridinecarboxylic acid ethyl ester' OR '5 cyclopropylaminocarbonyl 1, 4 dihydro 2, 6 dimethyl 4 (2 nitrophenyl) 3 pyridinecarboxylic acid octyl ester' OR '5 n (3, 4 dimethoxyphenethyl) 2 (3, 4 dimethoxyphenyl) 5 n methyl 2 isopropyl 1, 5 pentanediamine' OR '7 ((4 (bis (4 fluorophenyl) methyl) 1 piperazinyl) methyl) 2 ((2 hydroxyethyl) amino) 4 isopropyl 2, 4, 6 cycloheptatrien 1 one' OR '9 (2 chloro 6 fluorophenyl) 2, 3, 4, 5, 6, 9 hexahydro 7 methyl 1, 1 dioxothiacyclohepteno (3, 2 b) pyridine 8 carboxylic acid 2 (n benzyl n methylamino) ethyl ester' OR 'acebutolol plus nifedipine' OR 'agatoxin' OR 'aliskiren plus amlodipine' OR 'aliskiren plus amlodipine plus hydrochlorothiazide' OR 'amlodipine' OR 'amlodipine besylate' OR 'amlodipine maleate' OR 'amlodipine plus atorvastatin' OR 'amlodipine plus benazepril' OR 'amlodipine plus candesartan hexetil' OR 'amlodipine plus hydrochlorothiazide plus olmesartan' OR 'amlodipine plus hydrochlorothiazide plus valsartan' OR 'amlodipine plus olmesartan' OR 'amlodipine plus telmisartan' OR 'amlodipine plus valsartan' OR 'anipamil' OR 'aranidipine' OR 'atagabalin' OR 'atenolol plus nifedipine' OR 'azelnidipine' OR 'azidodiltiazem' OR 'azidopamil' OR 'azidopine' OR 'belfosdil' OR 'benidipine' OR 'benidipine derivative' OR 'bepriidil' OR 'brinazarone' OR 'calciseptine' OR 'caroverine' OR 'caroverine fumarate' OR 'cilnidipine' OR 'clentiazem' OR 'clevidipine' OR 'columbianadin' OR 'conotoxin' OR 'cronidipine' OR 'd 890' OR 'darodipine' OR 'deacetyl n nordiltiazem' OR 'deacetyl n, o dinordiltiazem' OR 'deacetyl o nordiltiazem' OR 'deacetyldiltiazem' OR 'dealkylnorverapamil' OR 'dealkylverapamil' OR 'deutolperisone' OR 'devapamil' OR 'dexniguldipine' OR 'dexverapamil' OR 'diclofurime' OR 'diclofurime mesilate' OR 'diltiazem' OR 'diltiazem derivative' OR 'diltiazem plus enalapril maleate' OR 'diperdipine' OR 'diproteverine' OR 'dopropidil' OR 'dotarizine' OR 'efonidipine' OR 'elgodipine' OR 'elnadipine' OR 'emopamil' OR 'enalapril maleate plus felodipine' OR 'enalapril maleate plus nitrendipine' OR 'enecadin' OR 'eperisone' OR 'falipamil' OR 'fantofarone' OR 'fasudil' OR 'felodipine' OR 'felodipine plus metoprolol' OR 'felodipine plus ramipril' OR 'fendiline' OR 'flordipine' OR 'flosatidil' OR 'fluspirilene' OR 'fostedil' OR 'furnidipine' OR 'gallopamil' OR 'iganidipine' OR 'isoperisone' OR 'isradipine' OR 'lacidipine' OR 'lemildipine' OR 'lercanidipine' OR 'lifarizine' OR 'lomerizine' OR 'manidipine' OR 'mepamil' OR 'mepirodipine' OR 'mesudipine' OR 'meta nisoldipine' OR 'mibefradil' OR 'modipafant' OR 'monatepil' OR 'n (2 guanidinoethyl) 5 isoquinolinesulfonamide' OR 'n (3 ((2 (3, 4 dimethoxyphenyl) ethyl) amino) propyl) 4 nitrobenzamide' OR 'n (3, 4 dimethoxyphenethyl) 5 methoxy n, alpha dimethyl 2 (phenylethynyl) phenylpropanamine' OR 'n (3, 4 dimethoxyphenethyl) n methyl 2 (2 naphthyl) 1, 3 dithiane 2 propylamine' OR 'n (3, 5 dimethoxyphenethyl) 5 methoxy 2 (phenylethynyl) amphetamine' OR 'n (6 aminohexyl) 1 naphthalenesulfonamide' OR 'n (6 aminohexyl) 5 chloro 1 naphthalenesulfonamide' OR 'n methylbepriidil' OR 'n nordiltiazem' OR 'naltiazem' OR 'hexopamil' OR 'nicardipine' OR 'nifedipine' OR 'nifedipine derivative' OR 'niguldipine' OR 'niludipine' OR 'nilvadipine' OR 'nimodipine' OR 'nisoldipine' OR 'nitrendipine' OR 'norgallopamil' OR 'norverapamil' OR 'olradipine' OR 'omega agatoxin' OR 'omega agatoxin IVA' OR 'omega agatoxin VIA' OR 'omega conotoxin' OR 'omega conotoxin CVID' OR 'omega conotoxin GVIA' OR 'omega conotoxin MVIIA' OR 'omega conotoxin MVIIC' OR 'omega conotoxin SVIB' OR 'oxodipine' OR 'palonidipine' OR 'perhexiline' OR 'perhexiline maleate' OR 'pimozide' OR 'pinokalanolol' OR 'pontuc' OR 'pranidipine' OR 'riodipine' OR 'ronipamil' OR 'sagandipine' OR 'semotiadil' OR 'siratiazem' OR 'snx 482' OR 'tamolarizine' OR 'teludipine' OR 'temiverine' OR 'terodiline' OR 'tolperisone' OR 'trandolapril plus verapamil' OR 'trelnarizine' OR 'verapamil' OR 'verapamil derivative' OR 'veratide' OR 'watanidipine' OR 'xestospongine C' OR 'zonisamide'</p> |
| 13 | 11 OR 12                                                                                                                                                                                                                                                                                                                                                                                                                                                                                                                                                                                                                                                                                                                                                                                                                                                                                                                                                                                                                                                                                                                                                                                                                                                                                                                                                                                                                                                                                                                                                                                                                                                                                                                                                                                                                                                                                                                                                                                                                                                                                                                                                                                                                                                                                                                                                                                                                                                                                                                                                                                                                                                                                                                                                                                                                                                                                                                                                                                                                                                                                                                                                                                                                                                                                                                                                                                                                                                                                                                                                                                                                                                                                                                                                                                                                                                                                                                                                                                                                                                                                                                                                                                                                                                                                                                                                                                                                                                                                                                                                                                                                                                                                                                                                                                                                                                                                                                                                                                                                                                                                                                                                                                                                                                           |
| 14 | 'ganglion blocking agent'                                                                                                                                                                                                                                                                                                                                                                                                                                                                                                                                                                                                                                                                                                                                                                                                                                                                                                                                                                                                                                                                                                                                                                                                                                                                                                                                                                                                                                                                                                                                                                                                                                                                                                                                                                                                                                                                                                                                                                                                                                                                                                                                                                                                                                                                                                                                                                                                                                                                                                                                                                                                                                                                                                                                                                                                                                                                                                                                                                                                                                                                                                                                                                                                                                                                                                                                                                                                                                                                                                                                                                                                                                                                                                                                                                                                                                                                                                                                                                                                                                                                                                                                                                                                                                                                                                                                                                                                                                                                                                                                                                                                                                                                                                                                                                                                                                                                                                                                                                                                                                                                                                                                                                                                                                          |
| 15 | 'azamethonium' OR 'benzohexonium' OR 'decyl-diisopropylammonium iodide' OR 'hexamethonium' OR 'hexamethonium bromide' OR 'hexamethonium chloride' OR 'hexamethonium chloride plus Rauwolfia alkaloid' OR 'hexamethonium chloride plus reserpine' OR 'mecamylamine' OR 'meprobamate plus                                                                                                                                                                                                                                                                                                                                                                                                                                                                                                                                                                                                                                                                                                                                                                                                                                                                                                                                                                                                                                                                                                                                                                                                                                                                                                                                                                                                                                                                                                                                                                                                                                                                                                                                                                                                                                                                                                                                                                                                                                                                                                                                                                                                                                                                                                                                                                                                                                                                                                                                                                                                                                                                                                                                                                                                                                                                                                                                                                                                                                                                                                                                                                                                                                                                                                                                                                                                                                                                                                                                                                                                                                                                                                                                                                                                                                                                                                                                                                                                                                                                                                                                                                                                                                                                                                                                                                                                                                                                                                                                                                                                                                                                                                                                                                                                                                                                                                                                                                            |



|    |                                                                                                                                                                                                                                                                                                                                                                                                                                                                                                                                                                                                                                                                                                                                                                                                                                                                                                                                                                                                                                                                                                                                                                                                                                                                                                                                                                                                                                                                                                                                                                                                                                                                                                                                                                                                                                                                                                                                                                                                                                                                                                                                                                                                                                                                                                                                                                                                                                                                                                                                                                                                                                                                                         |
|----|-----------------------------------------------------------------------------------------------------------------------------------------------------------------------------------------------------------------------------------------------------------------------------------------------------------------------------------------------------------------------------------------------------------------------------------------------------------------------------------------------------------------------------------------------------------------------------------------------------------------------------------------------------------------------------------------------------------------------------------------------------------------------------------------------------------------------------------------------------------------------------------------------------------------------------------------------------------------------------------------------------------------------------------------------------------------------------------------------------------------------------------------------------------------------------------------------------------------------------------------------------------------------------------------------------------------------------------------------------------------------------------------------------------------------------------------------------------------------------------------------------------------------------------------------------------------------------------------------------------------------------------------------------------------------------------------------------------------------------------------------------------------------------------------------------------------------------------------------------------------------------------------------------------------------------------------------------------------------------------------------------------------------------------------------------------------------------------------------------------------------------------------------------------------------------------------------------------------------------------------------------------------------------------------------------------------------------------------------------------------------------------------------------------------------------------------------------------------------------------------------------------------------------------------------------------------------------------------------------------------------------------------------------------------------------------------|
|    | pentolonium tartrate' OR 'pempidine' OR 'pempidine tartrate' OR 'pempidine tosilate' OR 'pentolonium tartrate' OR 'tetrylammonium' OR 'tetrylammonium bromide' OR 'tetrylammonium chloride' OR 'trimetaphan' OR 'trimethidinium methosulfate'                                                                                                                                                                                                                                                                                                                                                                                                                                                                                                                                                                                                                                                                                                                                                                                                                                                                                                                                                                                                                                                                                                                                                                                                                                                                                                                                                                                                                                                                                                                                                                                                                                                                                                                                                                                                                                                                                                                                                                                                                                                                                                                                                                                                                                                                                                                                                                                                                                           |
| 16 | 14 OR 15                                                                                                                                                                                                                                                                                                                                                                                                                                                                                                                                                                                                                                                                                                                                                                                                                                                                                                                                                                                                                                                                                                                                                                                                                                                                                                                                                                                                                                                                                                                                                                                                                                                                                                                                                                                                                                                                                                                                                                                                                                                                                                                                                                                                                                                                                                                                                                                                                                                                                                                                                                                                                                                                                |
| 17 | 'vasodilator agent'                                                                                                                                                                                                                                                                                                                                                                                                                                                                                                                                                                                                                                                                                                                                                                                                                                                                                                                                                                                                                                                                                                                                                                                                                                                                                                                                                                                                                                                                                                                                                                                                                                                                                                                                                                                                                                                                                                                                                                                                                                                                                                                                                                                                                                                                                                                                                                                                                                                                                                                                                                                                                                                                     |
| 18 | '2 [2 chloro 4 (2, 3, 4, 5 tetrahydro 3 oxo 6 pyridazinyl) phenoxy) n (2 morpholinoethyl) acetamide' OR '4, 5 dihydro 6 (4 (1h imidazol 1 yl) phenyl) 5 methyl 3 (2h) pyridazinone' OR '4 ethyl 2 hydroxyimino 5 nitro 3 hexenamido' OR '4 methyl 5 (4 pyridyl) 2 (3h) oxazolone' OR '4 propyl 5 (4 pyridyl) 2 (3h) oxazolone' OR '6 (4 (3 ((3 (4 (2 (cyclopropylmethoxy) ethyl) phenoxy) 2 hydroxypropyl) amino) propionamido) phenyl) 4, 5 dihydro 5 methyl 3 (2h) pyridazinone' OR '6 methyl 5 (4 pyridyl) 3h, 6h 1, 3, 4 thiadiazin 2 one' OR '8 hydroxy 7 nitro 2 nitromethyl 1, 4 benzodioxan' OR '8 tert butyl 6, 7 dihydro 5 methylpyrrolo (3, 2 e) pyrazolo (1, 5 a) pyrimidine 3 carbonitrile' OR 'acetylsalicylic acid plus dipyridamole' OR 'adrenomedullin' OR 'aligeron' OR 'amobarbital plus dimoxyline' OR 'amyl nitrite' OR 'ataciguat' OR 'ataprost' OR 'avi 4126' OR 'benfurodil' OR 'benfurodil hemisuccinate' OR 'bradykinin' OR 'briserin' OR 'bucindolol' OR 'carvedilol' OR 'cicaprost' OR 'ciclonicate' OR 'cilostazol' OR 'coronary vasodilating agent' OR 'cromakalim' OR 'dasantafil' OR 'dehydrocilostazol' OR 'dihydralazine plus oxprenolol' OR 'diisopropylamine dichloroacetate' OR 'dimoxyline' OR 'dorzolamide plus timolol maleate' OR 'dramedilol' OR 'eliprodil' OR 'endothelium derived hyperpolarizing factor' OR 'endothelium derived relaxing factor' OR 'enoximone' OR 'enoximone sulfoxide' OR 'etriciguat' OR 'fenoldopam' OR 'fenoldopam 4', 7, 8 tris (n ethylcarbamate)' OR 'fenoldopam 7, 8 bis (n ethylcarbamate)' OR 'fenoldopam mesilate' OR 'fronepidil' OR 'hydrochlorothiazide plus timolol maleate' OR 'ifenprodil' OR 'ifenprodil tartrate' OR 'iloprost' OR 'imazodan' OR 'kallidin' OR 'lemakalim' OR 'lemildipine' OR 'lodenafil' OR 'maxadilan' OR 'mirodenafil' OR 'n (1 (4 (4 fluorophenoxy) butyl) 4 piperidinyl) n methyl 2 benzothiazolamine' OR 'n (1 carboxy 5 (4 (2 hydroxy 3 isopropylaminopropoxy) indole 2 carboxamido) pentyl) alanylproline' OR 'n (2 guanidinoethyl) 5 isoquinolinesulfonamide' OR 'n (3 nitratopivaloyl) cysteine ethyl ester' OR 'n acetyl s nitrosopenicillamine' OR 'n cyano n` (2 nitroxyethyl) 3 pyridinecarboximidamide' OR 'nicametate' OR 'nicardipine' OR 'nipradilol' OR 'peripheral vasodilating agent' OR 'pimobendan' OR 'piroximone' OR 'proadrenomedullin' OR 'propentofylline' OR 'prostaglandin E1' OR 'proxazole' OR 'proxazole citrate' OR 'proxiphylline' OR 'puerarin' OR 's nitrosocaptopril' OR 's nitrosogluthathione' OR 'tetramethylpyrazine' OR 'timolol' OR 'timolol maleate' OR 'tiodazosin' OR 'trimethidinium methosulfate' OR 'visnadine' OR 'xantifibrate' |
| 19 | 17 OR 18                                                                                                                                                                                                                                                                                                                                                                                                                                                                                                                                                                                                                                                                                                                                                                                                                                                                                                                                                                                                                                                                                                                                                                                                                                                                                                                                                                                                                                                                                                                                                                                                                                                                                                                                                                                                                                                                                                                                                                                                                                                                                                                                                                                                                                                                                                                                                                                                                                                                                                                                                                                                                                                                                |
| 20 | 'beta adrenergic receptor blocking agent'                                                                                                                                                                                                                                                                                                                                                                                                                                                                                                                                                                                                                                                                                                                                                                                                                                                                                                                                                                                                                                                                                                                                                                                                                                                                                                                                                                                                                                                                                                                                                                                                                                                                                                                                                                                                                                                                                                                                                                                                                                                                                                                                                                                                                                                                                                                                                                                                                                                                                                                                                                                                                                               |
| 21 | '1 (1 naphthylloxy) 3 (6 (2 (2 pyridyl) ethoxy) hexylamino) 2 propanol' OR '1 (2, 4 dichlorophenoxy) 3 (2 (3, 4 dimethoxyphenyl) ethylamino) 2 propanol' OR '1 (2 cyanophenoxy) 3 (2 (3 phenylureido) ethylamino) 2 propanol' OR '1 (2 ethylphenoxy) 3 (1, 2, 3, 4 tetrahydro 1 naphthylamino) 2 propanol oxalate' OR '1 isopropylamino 3 (4 (2 methoxyethoxy) phenoxy) 2 propanol' OR '1 tert butylamino 3 (2 chlorophenoxy) 2 propanol' OR '1 tert butylamino 3 (2 methyl 4 indolyloxy) 2 propanol' OR '1 tert butylamino 3 (3 methyl 2 nitrophenoxy) 2 propanol' OR '2 isopropylamino 1 (4 tolyl) propanol' OR '3 (4 (2 hydroxy 3 isopropylaminopropoxy) phenyl) propionic acid' OR '3, 5 diamino 6 chloro n (1 (n (2 (2 hydroxy 3 (1 naphthoxy) propylamino) ethyl) carbamoyl) 1 methylethyl) pyrazine 2 carboxamide' OR '3 isopropylamino 1 (7 methyl 4 indanyloxy) 2 butanol' OR '4 (2 hydroxy 3 ((1 methyl 3 phenylpropyl) amino) propoxy) benzeneacetamide' OR '4 (2 hydroxy 3 isopropylaminopropoxy) carbanilic acid propyl ester' OR '4 (3 tert butylamino 2 hydroxypropoxy) 2 benzimidazolone' OR '4 cyclohexylamino 1 (1 naphthylloxy) 2 butanol' OR '4` methylthiopropylol' OR '5 (2 ((2 hydroxy 3 (4 (1 methyl 4 trifluoromethyl 2 imidazolyl) phenoxy) propyl) amino) ethoxy) salicylamide' OR '6 (4 (3 ((3 (4 (2 (cyclopropylmethoxy) ethyl) phenoxy) 2 hydroxypropyl) amino) propionamido) phenyl) 4, 5 dihydro 5 methyl 3 (2h) pyridazinone' OR '8 bromoacetamido 1 (2 hydroxy 3 (4 indolyloxy) propylamino) para menthane' OR '8 hydroxycarteolol' OR '9 (1 tert butylamino 3 hydroxy 2 propyloxyimino) fluorene' OR 'acebutolol' OR 'acebutolol plus nifedipine' OR 'adaprolol' OR 'adimolol' OR 'afurolol' OR 'alpha hydroxymetoprolol' OR 'alprenolol' OR 'alprenolol derivative' OR 'amosulalol' OR 'arotinolol' OR 'atenolol' OR 'atenolol plus chlortalidone' OR 'atenolol plus nifedipine' OR 'befunolol' OR 'bendacalol' OR 'bendroflumethiazide plus nadolol' OR 'bendroflumethiazide plus propranolol' OR 'beta 1 adrenergic receptor blocking agent' OR 'beta 2 adrenergic receptor blocking agent' OR 'beta 3 adrenergic receptor blocking agent' OR 'betaxolol' OR 'betaxolol plus chlortalidone' OR 'betaxolol plus pilocarpine' OR 'bevantolol' OR 'bfe 55' OR 'bimatoprost plus timolol' OR 'bisoprolol' OR 'bisoprolol'                                                                                                                                                                                                                                                                                                                             |

|    |                                                                                                                                                                                                                                                                                                                                                                                                                                                                                                                                                                                                                                                                                                                                                                                                                                                                                                                                                                                                                                                                                                                                                                                                                                                                                                                                                                                                                                                                                                                                                                                                                                                                                                                                                                                                                                                                                                                                                                                                                                                                                                                                                                                                                                                                                                                                                                                                                                                                                                                                                                                                                                                                                                                                                                                                   |
|----|---------------------------------------------------------------------------------------------------------------------------------------------------------------------------------------------------------------------------------------------------------------------------------------------------------------------------------------------------------------------------------------------------------------------------------------------------------------------------------------------------------------------------------------------------------------------------------------------------------------------------------------------------------------------------------------------------------------------------------------------------------------------------------------------------------------------------------------------------------------------------------------------------------------------------------------------------------------------------------------------------------------------------------------------------------------------------------------------------------------------------------------------------------------------------------------------------------------------------------------------------------------------------------------------------------------------------------------------------------------------------------------------------------------------------------------------------------------------------------------------------------------------------------------------------------------------------------------------------------------------------------------------------------------------------------------------------------------------------------------------------------------------------------------------------------------------------------------------------------------------------------------------------------------------------------------------------------------------------------------------------------------------------------------------------------------------------------------------------------------------------------------------------------------------------------------------------------------------------------------------------------------------------------------------------------------------------------------------------------------------------------------------------------------------------------------------------------------------------------------------------------------------------------------------------------------------------------------------------------------------------------------------------------------------------------------------------------------------------------------------------------------------------------------------------|
|    | fumarate' OR 'bisoprolol fumarate plus hydrochlorothiazide' OR 'bopindolol' OR 'bornaprolol' OR 'brefonalol' OR 'brimonidine plus timolol' OR 'brinzolamide plus timolol' OR 'bromoacetylalprenololmenthane' OR 'bucindolol' OR 'bucumolol' OR 'bufetolol' OR 'bufuralol' OR 'bunitrolol' OR 'bunolol' OR 'bupranolol' OR 'butofilolol' OR 'butoxamine' OR 'carazolol' OR 'carteolol' OR 'carvedilol' OR 'celiprolol' OR 'cetamolol' OR 'chlortalidone plus metoprolol' OR 'chlortalidone plus metoprolol tartrate' OR 'cloranolol' OR 'cyanoiodopindolol' OR 'cyanopindolol' OR 'cyclopenthiazine plus oxprenolol' OR 'deacetylmepipranolol' OR 'diacetolol' OR 'dihydralazine plus oxprenolol' OR 'dihydroalprenolol' OR 'dilevalol' OR 'dorzolamide plus timolol' OR 'dorzolamide plus timolol maleate' OR 'dramedilol' OR 'epanolol' OR 'ersentilide' OR 'esmolol' OR 'exaprolol' OR 'falintolol' OR 'falintolol oxalate' OR 'felodipine plus metoprolol' OR 'flestolol' OR 'flusoxolol' OR 'hydrochlorothiazide plus labetalol' OR 'hydrochlorothiazide plus metoprolol' OR 'hydrochlorothiazide plus metoprolol succinate' OR 'hydrochlorothiazide plus metoprolol tartrate' OR 'hydrochlorothiazide plus pindolol' OR 'hydrochlorothiazide plus propranolol' OR 'hydrochlorothiazide plus timolol maleate' OR 'hydroxybenzylpindolol' OR 'indenolol' OR 'iodopindolol' OR 'iprocrolol' OR 'isamoltane' OR 'isoxaprolol' OR 'labetalol' OR 'landiolol' OR 'latanoprost plus timolol' OR 'levobunolol' OR 'levomoprolol' OR 'medroxalol' OR 'mepindolol' OR 'mercuderamide' OR 'metipranolol' OR 'metoprolol' OR 'metoprolol fumarate' OR 'metoprolol succinate' OR 'metoprolol tartrate' OR 'moprolol' OR 'n (1 carboxy 5 (4 (2 hydroxy 3 isopropylaminopropoxy) indole 2 carboxamido) pentyl) alanylproline' OR 'n (2 (2 hydroxy 3 (4 (2 isobutoxyethoxy) phenoxy) propylamino) ethyl) 4 morpholinecarboxamide' OR 'n (2 (3 (4 (2 (2 cyclopropylmethoxyethoxy) ethyl) phenoxy) 2 hydroxypropylamino) ethyl) 4 hydroxy 1 piperidinecarboxamide' OR 'nadolol' OR 'neбивolol' OR 'nifenalol' OR 'nipradilol' OR 'oberadilol' OR 'oxprenolol' OR 'pafenolol' OR 'pamatolol' OR 'penbutolol' OR 'pindolol' OR 'pindolol derivative' OR 'practolol' OR 'prestim' OR 'primidolol' OR 'prizidilol' OR 'procinolol' OR 'pronetalol' OR 'propranolol' OR 'propranolol derivative' OR 'proxodolol' OR 'ridazolol' OR 'salcardolol' OR 'sandoz 204545' OR 'soquinolol' OR 'soquinolol mucate' OR 'sotalol' OR 'spirendolol' OR 'talinolol' OR 'tertatalol' OR 'tienoxolol' OR 'tilisolol' OR 'timolol' OR 'timolol maleate' OR 'timolol plus travoprost' OR 'tolamolol' OR 'toliprolol' OR 'trasitensin' OR 'trepress' OR 'tribendilol' OR 'viskaldix' OR 'xibenolol' OR 'zoleprodolol' OR 'zolertine' |
| 22 | 20 OR 21                                                                                                                                                                                                                                                                                                                                                                                                                                                                                                                                                                                                                                                                                                                                                                                                                                                                                                                                                                                                                                                                                                                                                                                                                                                                                                                                                                                                                                                                                                                                                                                                                                                                                                                                                                                                                                                                                                                                                                                                                                                                                                                                                                                                                                                                                                                                                                                                                                                                                                                                                                                                                                                                                                                                                                                          |
| 23 | 'dipeptidyl carboxypeptidase inhibitor'                                                                                                                                                                                                                                                                                                                                                                                                                                                                                                                                                                                                                                                                                                                                                                                                                                                                                                                                                                                                                                                                                                                                                                                                                                                                                                                                                                                                                                                                                                                                                                                                                                                                                                                                                                                                                                                                                                                                                                                                                                                                                                                                                                                                                                                                                                                                                                                                                                                                                                                                                                                                                                                                                                                                                           |
| 24 | '1, 2, 3, 4, 6, 7, 8, 12b octahydro 7 (2 mercapto 3 phenylpropionamido) 6 oxopyrido [2, 1 a] [2] benzazepine 4 carboxylic acid' OR '1 [3 [[1 [6 amino 2 (cyclobutylcarboxamido) hexanamido] 2 phenylethyl] hydroxyphosphinyloxy] butyryl] proline' OR '1 [3 (acetylthio) 3 benzoyl 2 methylpropionyl] proline' OR '1 [n (1 carboxy 3 phenylpropyl) alanyl] spiro [bicyclo [2.2.2] octane 2, 3` pyrrolidine] 5` carboxylic acid' OR '1 [n (1 carboxy 3 phenylpropyl) alanyl] spiro [bicyclo [2.2.2] octane 2, 3` pyrrolidine] 5` carboxylic acid 1 ethyl ester' OR '1 [n (1 ethoxycarbonyl 3 phenylpropyl) alanyl] 2, 3 dihydro 2 indolecarboxylic acid' OR '2 (3 mercapto 2 methylpropionyloxy) 3 methylthiopropionic acid' OR '3 carboxy 1, 2, 3, 7 tetrahydro 8 hydroxy 7 oxo 6 indolizidinepropionic acid' OR '7 [(1 carboxy 3 phenylpropyl) amino] 1, 2, 3, 4, 6, 7, 8, 12b octahydro 6 oxopyrido [2, 1 a] [2] benzazepine 4 carboxylic acid' OR '7 [(1 carboxy 3 phenylpropyl) amino] 3, 4, 6, 7, 8, 12b hexahydro 6 oxo 1h [1, 4] thiazino [3, 4 a] [2] benzazepine 4 carboxylic acid' OR '7 [(1 ethoxycarbonyl 3 phenylpropyl) amino] 1, 2, 3, 4, 6, 7, 8, 12b octahydro 6 oxopyrido [2, 1 a] [2] benzazepine 4 carboxylic acid benzhydryl ester' OR '7 (2 acetylthio 3 phenylpropionamido) 1, 2, 3, 4, 6, 7, 8, 12b octahydro 6 oxopyrido [2, 1 a] [2] benzazepine 4 carboxylic acid' OR 'alacepril' OR 'altiopril' OR 'altiopril calcium' OR 'amlodipine plus benazepril' OR 'ancovenin' OR 'atorvastatin plus ramipril' OR 'benazepril' OR 'benazepril plus hydrochlorothiazide' OR 'benazeprilat' OR 'captopril' OR 'captopril plus hydrochlorothiazide' OR 'ceranapril' OR 'cilazapril' OR 'cilazapril plus hydrochlorothiazide' OR 'cilazaprilat' OR 'deacetylalacepril' OR 'delapril' OR 'diltiazem plus enalapril maleate' OR 'enalapril' OR 'enalapril maleate' OR 'enalapril maleate plus felodipine' OR 'enalapril maleate plus hydrochlorothiazide' OR 'enalapril maleate plus nitrendipine' OR 'enalapril plus hydrochlorothiazide' OR 'enalaprilat' OR 'epicaptopril' OR 'fasidotril' OR 'fasidotrilat' OR 'felodipine plus ramipril' OR 'foroxymithine' OR 'fosinopril' OR 'fosinopril plus hydrochlorothiazide' OR 'fosinoprilat' OR 'gemopatrilat' OR 'hydrochlorothiazide plus lisinopril' OR 'hydrochlorothiazide plus moexipril' OR 'hydrochlorothiazide plus quinapril' OR 'hydrochlorothiazide plus ramipril' OR 'idrapril' OR 'ilepatril' OR 'imidapril' OR 'imidaprilat' OR 'indapamide plus perindopril' OR 'indolapril' OR 'k 13' OR 'libenzapril' OR 'lisinopril' OR 'moexipril' OR 'moexiprilat' OR 'n [[1 (2 acetylthio 3 methyl 1 oxobutylamino) 1 cyclopentyl] carbonyl] o methyltyrosine ethyl ester' OR 'n [[1 (2 mercapto 3 methyl 1                     |

|    |                                                                                                                                                                                                                                                                                                                                                                                                                                                                                                                                                                                                                                                                                                                                                                                                                                                                                                                                                                                                                                                                                                                                                                                                                                                                                                                                                                                                                                                                                                                                                                                                                                                                                                                                                                                                                                                                                                                                                                                                                                                                                                                                                                                                                                                                                                                                                                                                                                                                                                                                                                                                                                                                                                                                                                                                                                                                                                                                                                                                                                                                                                                                                                                                                                                                                                                                                                                                                                                                                                                                                                                                                                                                                                                                                                                                                                                                                                                                                                                                                                                                                                                                                                                                                                                                                                                                                                                                                                                                                                                                                                  |
|----|------------------------------------------------------------------------------------------------------------------------------------------------------------------------------------------------------------------------------------------------------------------------------------------------------------------------------------------------------------------------------------------------------------------------------------------------------------------------------------------------------------------------------------------------------------------------------------------------------------------------------------------------------------------------------------------------------------------------------------------------------------------------------------------------------------------------------------------------------------------------------------------------------------------------------------------------------------------------------------------------------------------------------------------------------------------------------------------------------------------------------------------------------------------------------------------------------------------------------------------------------------------------------------------------------------------------------------------------------------------------------------------------------------------------------------------------------------------------------------------------------------------------------------------------------------------------------------------------------------------------------------------------------------------------------------------------------------------------------------------------------------------------------------------------------------------------------------------------------------------------------------------------------------------------------------------------------------------------------------------------------------------------------------------------------------------------------------------------------------------------------------------------------------------------------------------------------------------------------------------------------------------------------------------------------------------------------------------------------------------------------------------------------------------------------------------------------------------------------------------------------------------------------------------------------------------------------------------------------------------------------------------------------------------------------------------------------------------------------------------------------------------------------------------------------------------------------------------------------------------------------------------------------------------------------------------------------------------------------------------------------------------------------------------------------------------------------------------------------------------------------------------------------------------------------------------------------------------------------------------------------------------------------------------------------------------------------------------------------------------------------------------------------------------------------------------------------------------------------------------------------------------------------------------------------------------------------------------------------------------------------------------------------------------------------------------------------------------------------------------------------------------------------------------------------------------------------------------------------------------------------------------------------------------------------------------------------------------------------------------------------------------------------------------------------------------------------------------------------------------------------------------------------------------------------------------------------------------------------------------------------------------------------------------------------------------------------------------------------------------------------------------------------------------------------------------------------------------------------------------------------------------------------------------------------------------|
|    | oxobutylamino) 1 cyclopentyl] carbonyl] o methyltyrosine' OR 'n (1 carboxy 3 phenylpropyl) lysylproline 4 hydroxybenzamidine' OR 'n [1 carboxy 5 [4 (2 hydroxy 3 isopropylaminopropoxy) indole 2 carboxamido] pentyl] alanylproline' OR 'n (2 mercaptomethyl 3 phenylbutyryl) alanine' OR 'n (5 benzamido 4 oxo 6 phenylhexanoyl) proline' OR 'n (8 amino 1 carboxyoctyl) alanylproline' OR 'n [n (1 ethoxycarbonyl 3 phenylpropyl) alanyl] n (1 pyrrolidinyl) glycine' OR 'omapatrilat' OR 'pentopril' OR 'pentoprilat' OR 'perindopril' OR 'perindopril tert butylamine' OR 'perindoprilat' OR 'pivopril' OR 'quinapril' OR 'quinaprilat' OR 'ramipril' OR 'ramiprilat' OR 'rentiapril' OR 's nitrosocaptopril' OR 'sampilat' OR 'spirapril' OR 'spiraprilat' OR 'temocapril' OR 'temocaprilat' OR 'teprotide' OR 'trandolapril' OR 'trandolapril plus verapamil' OR 'trandolaprilat' OR 'utibapril' OR 'utibaprilat' OR 'vasopeptidase inhibitor' OR 'zabicipril' OR 'zabiciprilat' OR 'zofenopril' OR 'zofenoprilat'                                                                                                                                                                                                                                                                                                                                                                                                                                                                                                                                                                                                                                                                                                                                                                                                                                                                                                                                                                                                                                                                                                                                                                                                                                                                                                                                                                                                                                                                                                                                                                                                                                                                                                                                                                                                                                                                                                                                                                                                                                                                                                                                                                                                                                                                                                                                                                                                                                                                                                                                                                                                                                                                                                                                                                                                                                                                                                                                                                                                                                                                                                                                                                                                                                                                                                                                                                                                                                                                                                                                         |
| 25 | 23 OR 24                                                                                                                                                                                                                                                                                                                                                                                                                                                                                                                                                                                                                                                                                                                                                                                                                                                                                                                                                                                                                                                                                                                                                                                                                                                                                                                                                                                                                                                                                                                                                                                                                                                                                                                                                                                                                                                                                                                                                                                                                                                                                                                                                                                                                                                                                                                                                                                                                                                                                                                                                                                                                                                                                                                                                                                                                                                                                                                                                                                                                                                                                                                                                                                                                                                                                                                                                                                                                                                                                                                                                                                                                                                                                                                                                                                                                                                                                                                                                                                                                                                                                                                                                                                                                                                                                                                                                                                                                                                                                                                                                         |
| 26 | 'antihypertensive agent'                                                                                                                                                                                                                                                                                                                                                                                                                                                                                                                                                                                                                                                                                                                                                                                                                                                                                                                                                                                                                                                                                                                                                                                                                                                                                                                                                                                                                                                                                                                                                                                                                                                                                                                                                                                                                                                                                                                                                                                                                                                                                                                                                                                                                                                                                                                                                                                                                                                                                                                                                                                                                                                                                                                                                                                                                                                                                                                                                                                                                                                                                                                                                                                                                                                                                                                                                                                                                                                                                                                                                                                                                                                                                                                                                                                                                                                                                                                                                                                                                                                                                                                                                                                                                                                                                                                                                                                                                                                                                                                                         |
| 27 | '1 ((6 hydrazino 3 pyridazinyl) ethylamino) 2 propanol' OR '1 tert butylamino 3 (2 methyl 4 indolyloxy) 2 propanol' OR '2 (2 (3, 4 dimethoxyphenyl) ethyl) amino 1 (2, 6 dimethylphenoxy) propane' OR '2 (2 (4 fluorophenoxy) ethyl) phenol' OR '(2 (2 (4 fluorophenoxy) ethyl) phenyl) sulfate' OR '2 (3 ((2 benzo (1, 4) dioxanyl) methylamino) propyl) 3 (2h) pyridazinone' OR '2 guanidinobenzimidazole' OR '3 (2 (4 (2 methoxyphenyl) 1 piperazinyl) ethyl) 2, 4 (1h, 3h) quinazolinedione' OR '4 (2 (3 cyclohexyl 3 hydroxy 1 propynyl) 3 hydroxybicyclo (4.2.0) oct 7 ylidene) butyric acid' OR '4 (5) (2 (2, 6 dimethylphenyl) ethyl) imidazole' OR '4 amino 5 cyclopropyl 2 (1 (2 fluorobenzyl) 1h pyrazolo (3, 4 b) pyridin 3 yl) pyrimidine' OR '5 amino 2 guanidinobenzimidazole' OR '((5 chloro 3 (2 methylphenyl) 4 oxo 4h benzopyran 7 yl) oxy) acetic acid' OR '5 formylurapidil' OR '5 methylurapidil' OR '6 (4 (3 ((3 (4 (2 (cyclopropylmethoxy) ethyl) phenoxy) 2 hydroxypropyl) amino) propionamido) phenyl) 4, 5 dihydro 5 methyl 3 (2h) pyridazinone' OR '6, 7 dichloro 2, 3 dihydro 5 (n, n dimethylsulfamoyl) coumarilic acid' OR 'acebutolol plus nifedipine' OR 'acecarbromal plus reserpine' OR 'adimolol' OR 'adrenomedullin' OR 'alfuzosin' OR 'aliskiren plus amlodipine' OR 'aliskiren plus amlodipine plus hydrochlorothiazide' OR 'aliskiren plus hydrochlorothiazide' OR 'altizide' OR 'amiloride plus cyclopenthiiazide' OR 'amiloride plus hydrochlorothiazide' OR 'amlodipine' OR 'amlodipine besylate' OR 'amlodipine maleate' OR 'amlodipine plus atorvastatin' OR 'amosulalol' OR 'angiotensin receptor antagonist' OR 'arotinolol' OR 'ascorbic acid plus hesperidin plus reserpine' OR 'ascorbic acid plus mannitol hexanitrate plus reserpine plus rutoside' OR 'ascorbic acid plus mannitol hexanitrate plus reserpine plus rutoside plus theophylline' OR 'atenolol' OR 'atenolol plus chlortalidone' OR 'atenolol plus nifedipine' OR 'atropine plus hyoscyamine plus reserpine plus scopolamine bromide' OR 'azelinidipine' OR 'bamethan' OR 'bendroflumethiazide' OR 'bendroflumethiazide plus nadolol' OR 'bendroflumethiazide plus potassium chloride' OR 'bendroflumethiazide plus propranolol' OR 'benidipine' OR 'benzthiazide' OR 'benzthiazide plus triamterene' OR 'benzylhydrochlorothiazide' OR 'besulpamide' OR 'betanidine' OR 'betaxolol plus chlortalidone' OR 'bevantolol' OR 'bisoprolol fumarate plus hydrochlorothiazide' OR 'bopindolol' OR 'briserin' OR 'bucindolol' OR 'budralazine' OR 'bufuralol' OR 'bunazosin' OR 'butizide' OR 'butizide plus spironolactone' OR 'cadralazine' OR 'carmoxirole' OR 'carteolol' OR 'carvedilol' OR 'catestatin' OR 'celikalim' OR 'celiprolol' OR 'centhaquin' OR 'cetamolol' OR 'chlorisondamine' OR 'chlorothiazide' OR 'chlorothiazide plus methyl dopa' OR 'chlorothiazide plus reserpine' OR 'chlortalidone' OR 'chlortalidone plus clonidine' OR 'chlortalidone plus metoprolol' OR 'chlortalidone plus metoprolol tartrate' OR 'chlortalidone plus reserpine' OR 'cicletanine' OR 'clentiazem' OR 'clonidine' OR 'clopamide' OR 'cloranolol' OR 'clorexolone' OR 'cromakalim' OR 'cryptenamine' OR 'cryptenamine plus reserpine' OR 'cyanocobalamin plus rescinnamine plus thiamine' OR 'cyclopenthiiazide' OR 'cyclopenthiiazide plus guanethidine' OR 'cyclopenthiiazide plus oxprenolol' OR 'cyclothiazide' OR 'debrisoquine' OR 'deserpidine' OR 'deserpidine plus hydrochlorothiazide' OR 'deserpidine plus methyclothiazide' OR 'deserpidine plus pentobarbital' OR 'dexamphetamine plus reserpine' OR 'diazoxide' OR 'diethylstilbestrol plus methyltestosterone plus reserpine' OR 'dihydralazine' OR 'dihydralazine plus hydrochlorothiazide plus reserpine' OR 'dihydralazine plus oxprenolol' OR 'dihydralazine plus reserpine' OR 'diisopropylamine' OR 'diisopropylamine dichloroacetate' OR 'dilevalol' OR 'dimevamide plus phenobarbital plus reserpine' OR 'dipeptidyl carboxypeptidase inhibitor' OR 'diucomb' OR 'doxazosin' OR 'doxazosin mesylate' OR 'dramedilol' OR 'endralazine' OR 'ephedrine sulfate plus reserpine' OR 'epitizide' OR 'etacrynic acid' OR 'ethinylestradiol plus reserpine' OR 'felodipine' OR 'felodipine plus metoprolol' OR 'fenoldopam' OR 'fenoldopam 4, 7, 8 tris (n ethylcarbamate)' OR 'fenoldopam 7, 8 bis (n ethylcarbamate)' OR 'fenoldopam mesilate' OR 'flavodilol' OR 'flavodilol maleate' OR 'flesinoxan' OR 'flutonidine' OR 'forskolin' OR 'furosemide' OR 'glyceryl trinitrate plus |

|    |                                                                                                                                                                                                                                                                                                                                                                                                                                                                                                                                                                                                                                                                                                                                                                                                                                                                                                                                                                                                                                                                                                                                                                                                                                                                                                                                                                                                                                                                                                                                                                                                                                                                                                                                                                                                                                                                                                                                                                                                                                                                                                                                                                                                                                                                                                                                                                                                                                                                                                                                                                                                                                                                                                                                                                                                                                                                                                                                                                                                                                                                                                                                                                                                                                                                                                                                                                                                                                                                                                                                                                                                                                                                                                                                                                                                                                                                                                                                                                                                                                                                                                                                                                                                                                                                                                                                                                                                                                                                                                                                                                                                                                                                                                                                                                                             |
|----|---------------------------------------------------------------------------------------------------------------------------------------------------------------------------------------------------------------------------------------------------------------------------------------------------------------------------------------------------------------------------------------------------------------------------------------------------------------------------------------------------------------------------------------------------------------------------------------------------------------------------------------------------------------------------------------------------------------------------------------------------------------------------------------------------------------------------------------------------------------------------------------------------------------------------------------------------------------------------------------------------------------------------------------------------------------------------------------------------------------------------------------------------------------------------------------------------------------------------------------------------------------------------------------------------------------------------------------------------------------------------------------------------------------------------------------------------------------------------------------------------------------------------------------------------------------------------------------------------------------------------------------------------------------------------------------------------------------------------------------------------------------------------------------------------------------------------------------------------------------------------------------------------------------------------------------------------------------------------------------------------------------------------------------------------------------------------------------------------------------------------------------------------------------------------------------------------------------------------------------------------------------------------------------------------------------------------------------------------------------------------------------------------------------------------------------------------------------------------------------------------------------------------------------------------------------------------------------------------------------------------------------------------------------------------------------------------------------------------------------------------------------------------------------------------------------------------------------------------------------------------------------------------------------------------------------------------------------------------------------------------------------------------------------------------------------------------------------------------------------------------------------------------------------------------------------------------------------------------------------------------------------------------------------------------------------------------------------------------------------------------------------------------------------------------------------------------------------------------------------------------------------------------------------------------------------------------------------------------------------------------------------------------------------------------------------------------------------------------------------------------------------------------------------------------------------------------------------------------------------------------------------------------------------------------------------------------------------------------------------------------------------------------------------------------------------------------------------------------------------------------------------------------------------------------------------------------------------------------------------------------------------------------------------------------------------------------------------------------------------------------------------------------------------------------------------------------------------------------------------------------------------------------------------------------------------------------------------------------------------------------------------------------------------------------------------------------------------------------------------------------------------------------------------------|
|    | <p>pentaerythrityl tetranitrate plus reserpine' OR 'guabenxan' OR 'guanabenz' OR 'guanabenz acetate' OR 'guanacline' OR 'guanadrel' OR 'guanadrel sulfate' OR 'guanazodine' OR 'guancidine' OR 'guanclofine' OR 'guanethidine' OR 'guanethidine plus hydrochlorothiazide' OR 'guanfacine' OR 'guanoclor' OR 'guanoxabenz' OR 'guanoxan' OR 'hexamethonium' OR 'hexamethonium bromide' OR 'hexamethonium chloride' OR 'hexamethonium chloride plus Rauwolfia alkaloid' OR 'hexamethonium chloride plus reserpine' OR 'hydralazine' OR 'hydralazine plus hydrochlorothiazide' OR 'hydralazine plus hydrochlorothiazide plus reserpine' OR 'hydralazine plus reserpine' OR 'hydrochlorothiazide' OR 'hydrochlorothiazide plus labetalol' OR 'hydrochlorothiazide plus meprobamate' OR 'hydrochlorothiazide plus methyl dopa' OR 'hydrochlorothiazide plus metoprolol' OR 'hydrochlorothiazide plus metoprolol succinate' OR 'hydrochlorothiazide plus metoprolol tartrate' OR 'hydrochlorothiazide plus pentaerythrityl tetranitrate' OR 'hydrochlorothiazide plus pindolol' OR 'hydrochlorothiazide plus potassium chloride' OR 'hydrochlorothiazide plus potassium chloride plus reserpine' OR 'hydrochlorothiazide plus propranolol' OR 'hydrochlorothiazide plus reserpine' OR 'hydrochlorothiazide plus reserpine plus secbutabarbital' OR 'hydrochlorothiazide plus spironolactone' OR 'hydrochlorothiazide plus syrosingopine' OR 'hydrochlorothiazide plus timolol maleate' OR 'hydrochlorothiazide plus triamterene' OR 'hydroflumethiazide' OR 'hydroflumethiazide plus potassium chloride' OR 'hydroflumethiazide plus potassium chloride plus reserpine' OR 'hydroflumethiazide plus reserpine' OR 'indacrinone' OR 'indapamide' OR 'indoramin' OR 'iptakalim' OR 'irindalone' OR 'kadiur' OR 'ketanserin' OR 'ketanserin tartrate' OR 'ketanserinol' OR 'lemekalim' OR 'levomoprolol' OR 'lofexidine' OR 'losulazine' OR 'mebutamate' OR 'mebutizide' OR 'mecamylamine' OR 'medullipin 1' OR 'medullipin 2' OR 'mefruside' OR 'meprobamate plus pentolonium tartrate' OR 'mercuderamide' OR 'metazosin' OR 'methamphetamine plus reserpine' OR 'methyclothiazide' OR 'methyclothiazide plus pargyline' OR 'methyclothiazide plus reserpine' OR 'methyl dopa' OR 'methyl dopate' OR 'methylphenobarbital plus reserpine' OR 'metipranolol' OR 'metirosine' OR 'metirosine methyl ester' OR 'metolazone' OR 'minoxidil' OR 'minoxidil sulfate' OR 'miopressin' OR 'molsidomine' OR 'moprolol' OR 'moxonidine' OR 'muzolimine' OR 'n (3, 4 dimethoxyphenethyl) 5 methoxy n, alpha dimethyl 2 (phenylethynyl) phenylpropanamine' OR 'naftopidil' OR 'nebivolol' OR 'nexopamil' OR 'nicotinic acid plus pentetrazole plus reserpine' OR 'nipradilol' OR 'nitroprusside sodium' OR 'pempidine' OR 'pempidine tartrate' OR 'pempidine tosilate' OR 'penbutolol' OR 'penflutizide' OR 'pentaerythrityl tetranitrate plus Rauwolfia alkaloid' OR 'pentaerythrityl tetranitrate plus reserpine' OR 'pentaerythrityl tetranitrate plus reserpine plus secbutabarbital' OR 'pentobarbital plus reserpine' OR 'pentolonium tartrate' OR 'pf 3392455' OR 'pf 489791' OR 'phenobarbital plus Rauwolfia alkaloid plus theobromine' OR 'phenobarbital plus reserpine' OR 'phenobarbital plus reserpine plus theobromine' OR 'phenobarbital plus reserpine plus thiamine' OR 'phenoxybenzamine' OR 'phentolamine' OR 'phentolamine mesylate' OR 'pholedrine' OR 'pinacidil' OR 'piretanide' OR 'polythiazide' OR 'polythiazide plus prazosin' OR 'polythiazide plus reserpine' OR 'pontuc' OR 'prazosin' OR 'prestim' OR 'prizidilol' OR 'proadrenomedullin' OR 'propranolol' OR 'protoveratrine A plus protoveratrine B plus reserpine' OR 'protoveratrine A plus reserpine' OR 'pyrrobutamine plus reserpine' OR 'quinethazone' OR 'quinethazone plus reserpine' OR 'quinpirole' OR 'rautrax' OR 'rautrax n' OR 'Rauwolfia alkaloid' OR 'rauwolescine' OR 'rescinamine' OR 'reserpine' OR 'reserpine derivative' OR 'reserpine plus secbutabarbital' OR 'reserpine plus trichlormethiazide' OR 'rilmenidine' OR 'rostafuroxin' OR 'sali aldopur' OR 'saralasin' OR 'saralasin acetate' OR 'selexipag' OR 'sildenafil' OR 'soquinolol' OR 'soquinolol mucate' OR 'spirgetine' OR 'syrosingopine' OR 'tadalafil' OR 'teclothiazide' OR 'terazosin' OR 'tiamenidine' OR 'tiamizide' OR 'tienilic acid' OR 'tienoxolol' OR 'tiodazosin' OR 'todralazine' OR 'torasemide' OR 'torrat' OR 'trasitensin' OR 'trepress' OR 'triamterene' OR 'triamterene plus xipamide' OR 'tribendilol' OR 'trichlormethiazide' OR 'trimazosin' OR 'trimetaphan' OR 'trimethidinium methosulfate' OR 'triniton' OR 'tripamide' OR 'uniprost' OR 'urapidil' OR 'verapamil' OR 'veratide' OR 'viskaldix' OR 'xipamide'</p> |
| 28 | 26 OR 27                                                                                                                                                                                                                                                                                                                                                                                                                                                                                                                                                                                                                                                                                                                                                                                                                                                                                                                                                                                                                                                                                                                                                                                                                                                                                                                                                                                                                                                                                                                                                                                                                                                                                                                                                                                                                                                                                                                                                                                                                                                                                                                                                                                                                                                                                                                                                                                                                                                                                                                                                                                                                                                                                                                                                                                                                                                                                                                                                                                                                                                                                                                                                                                                                                                                                                                                                                                                                                                                                                                                                                                                                                                                                                                                                                                                                                                                                                                                                                                                                                                                                                                                                                                                                                                                                                                                                                                                                                                                                                                                                                                                                                                                                                                                                                                    |
| 29 | 'angiotensin 1 receptor antagonist'                                                                                                                                                                                                                                                                                                                                                                                                                                                                                                                                                                                                                                                                                                                                                                                                                                                                                                                                                                                                                                                                                                                                                                                                                                                                                                                                                                                                                                                                                                                                                                                                                                                                                                                                                                                                                                                                                                                                                                                                                                                                                                                                                                                                                                                                                                                                                                                                                                                                                                                                                                                                                                                                                                                                                                                                                                                                                                                                                                                                                                                                                                                                                                                                                                                                                                                                                                                                                                                                                                                                                                                                                                                                                                                                                                                                                                                                                                                                                                                                                                                                                                                                                                                                                                                                                                                                                                                                                                                                                                                                                                                                                                                                                                                                                         |
| 30 | 'aliskiren'                                                                                                                                                                                                                                                                                                                                                                                                                                                                                                                                                                                                                                                                                                                                                                                                                                                                                                                                                                                                                                                                                                                                                                                                                                                                                                                                                                                                                                                                                                                                                                                                                                                                                                                                                                                                                                                                                                                                                                                                                                                                                                                                                                                                                                                                                                                                                                                                                                                                                                                                                                                                                                                                                                                                                                                                                                                                                                                                                                                                                                                                                                                                                                                                                                                                                                                                                                                                                                                                                                                                                                                                                                                                                                                                                                                                                                                                                                                                                                                                                                                                                                                                                                                                                                                                                                                                                                                                                                                                                                                                                                                                                                                                                                                                                                                 |
| 31 | 4 OR 7 OR 10 OR 13 OR 16 OR 19 OR 22 OR 25 OR 28 OR 29 OR 30                                                                                                                                                                                                                                                                                                                                                                                                                                                                                                                                                                                                                                                                                                                                                                                                                                                                                                                                                                                                                                                                                                                                                                                                                                                                                                                                                                                                                                                                                                                                                                                                                                                                                                                                                                                                                                                                                                                                                                                                                                                                                                                                                                                                                                                                                                                                                                                                                                                                                                                                                                                                                                                                                                                                                                                                                                                                                                                                                                                                                                                                                                                                                                                                                                                                                                                                                                                                                                                                                                                                                                                                                                                                                                                                                                                                                                                                                                                                                                                                                                                                                                                                                                                                                                                                                                                                                                                                                                                                                                                                                                                                                                                                                                                                |
| 32 | 'sleep disordered breathing' OR ('sleep' AND 'apnea') OR 'central sleep apnea syndrome' OR 'obesity hypoventilation syndrome' OR 'upper airway resistance syndrome'                                                                                                                                                                                                                                                                                                                                                                                                                                                                                                                                                                                                                                                                                                                                                                                                                                                                                                                                                                                                                                                                                                                                                                                                                                                                                                                                                                                                                                                                                                                                                                                                                                                                                                                                                                                                                                                                                                                                                                                                                                                                                                                                                                                                                                                                                                                                                                                                                                                                                                                                                                                                                                                                                                                                                                                                                                                                                                                                                                                                                                                                                                                                                                                                                                                                                                                                                                                                                                                                                                                                                                                                                                                                                                                                                                                                                                                                                                                                                                                                                                                                                                                                                                                                                                                                                                                                                                                                                                                                                                                                                                                                                         |
| 33 | ('mixed' OR 'central' OR 'obstructive') NEAR/3 'sleep'                                                                                                                                                                                                                                                                                                                                                                                                                                                                                                                                                                                                                                                                                                                                                                                                                                                                                                                                                                                                                                                                                                                                                                                                                                                                                                                                                                                                                                                                                                                                                                                                                                                                                                                                                                                                                                                                                                                                                                                                                                                                                                                                                                                                                                                                                                                                                                                                                                                                                                                                                                                                                                                                                                                                                                                                                                                                                                                                                                                                                                                                                                                                                                                                                                                                                                                                                                                                                                                                                                                                                                                                                                                                                                                                                                                                                                                                                                                                                                                                                                                                                                                                                                                                                                                                                                                                                                                                                                                                                                                                                                                                                                                                                                                                      |

|    |                                                                                                                                                                                                           |
|----|-----------------------------------------------------------------------------------------------------------------------------------------------------------------------------------------------------------|
| 34 | 'sa' OR 'osa' OR 'osas' OR 'ahi' OR 'sas' OR 'sahs' OR 'srbd' OR 'rdi'                                                                                                                                    |
| 35 | 'sleep' OR 'hypersomnia'                                                                                                                                                                                  |
| 36 | 33 OR 34 OR 35                                                                                                                                                                                            |
| 37 | ('apnea' OR 'apneas') OR ('apnaea' OR 'apnaeas') OR ('apnoe' OR 'apnoes') OR ('apnoea' OR 'apnoeas')                                                                                                      |
| 38 | ('hypopnea' OR 'hypopneas') OR ('hypopnaea' OR 'hypopnaeas') OR ('hypopnoe' OR 'hypopnoes') OR ('hypopnoea' OR 'hypopnoeas')                                                                              |
| 39 | ('apnea-hypopnea' OR 'apnea/hypopnea') OR ('apnaea-hypopnaea' OR 'apnaea/hypopnaea') OR ('apnoe-hypopnoe' OR 'apnoe/hypopnoe') OR ('apnoea-hypopnoea' OR 'apnoea/hypopnoea') OR 'respiratory disturbance' |
| 40 | 'hypoxia' OR 'hypoxemia' OR 'hypoxaemia' OR 'repetitive hypoxemia' OR 'repetitive hypoxaemia' OR 'periodic respiration' OR 'respiratory disturbance' OR 'breathing'                                       |
| 41 | 37 OR 38 OR 39 OR 40                                                                                                                                                                                      |
| 42 | 36 AND 41                                                                                                                                                                                                 |
| 43 | 32 OR 42                                                                                                                                                                                                  |
| 44 | 43 AND 31                                                                                                                                                                                                 |

## PubMed search strategy 1 (2012)

| # | Search strategy                                                                                                                                                                                                                                                                                                                                                                                                                                                                                                                                                                                                                                                                                                                                                                                                                                                                                                                                                                                                                                                                                                                                                                                                                                                                                                                                                                                                                                                                                                                                                                                                                                                                                                                                                                                                                                                                                                                                                                                                                                                                                                                                                                                                                                                                                                                                                                                                                                                                                                                                                                                                                                                                                                                                                                                                                                                                                                                                                      |
|---|----------------------------------------------------------------------------------------------------------------------------------------------------------------------------------------------------------------------------------------------------------------------------------------------------------------------------------------------------------------------------------------------------------------------------------------------------------------------------------------------------------------------------------------------------------------------------------------------------------------------------------------------------------------------------------------------------------------------------------------------------------------------------------------------------------------------------------------------------------------------------------------------------------------------------------------------------------------------------------------------------------------------------------------------------------------------------------------------------------------------------------------------------------------------------------------------------------------------------------------------------------------------------------------------------------------------------------------------------------------------------------------------------------------------------------------------------------------------------------------------------------------------------------------------------------------------------------------------------------------------------------------------------------------------------------------------------------------------------------------------------------------------------------------------------------------------------------------------------------------------------------------------------------------------------------------------------------------------------------------------------------------------------------------------------------------------------------------------------------------------------------------------------------------------------------------------------------------------------------------------------------------------------------------------------------------------------------------------------------------------------------------------------------------------------------------------------------------------------------------------------------------------------------------------------------------------------------------------------------------------------------------------------------------------------------------------------------------------------------------------------------------------------------------------------------------------------------------------------------------------------------------------------------------------------------------------------------------------|
| 1 | Hypertension[MeSH] OR "hypertension" ("blood pressure" AND "high") OR ("blood pressure" AND "elevated") OR ("bp" AND "high") OR ("bp" AND "elevated") OR ("antihypertensive" OR "anti-hypertensive" OR "anti hypertensive") OR "ht" OR "htn"                                                                                                                                                                                                                                                                                                                                                                                                                                                                                                                                                                                                                                                                                                                                                                                                                                                                                                                                                                                                                                                                                                                                                                                                                                                                                                                                                                                                                                                                                                                                                                                                                                                                                                                                                                                                                                                                                                                                                                                                                                                                                                                                                                                                                                                                                                                                                                                                                                                                                                                                                                                                                                                                                                                         |
| 2 | Diuretics[MeSH] OR Diuretics[Pharmacological Action] OR ("diuretic" OR "diuretics") OR ("Diuretic Effect" OR "Diuretic Effects") OR ("1,3-dipropyl-8-(3-noradamantyl)xanthine"[Supplementary Concept] OR "1,3-dipropyl-8-(3-noradamantyl)xanthine") OR (2-aminomethyl-4-t-butyl-6-iodophenol[Supplementary Concept] OR "2-aminomethyl-4-t-butyl-6-iodophenol") OR (Acetazolamide[MeSH] OR "Acetazolamide") OR (Amiloride[MeSH] OR "Amiloride") OR ("amiloride, hydrochlorothiazide drug combination"[Supplementary Concept] OR "amiloride, hydrochlorothiazide drug combination") OR ("atrial natriuretic factor prohormone (1-98)"[Supplementary Concept] OR "atrial natriuretic factor prohormone (1-98)") OR ("atrial natriuretic factor prohormone (102-126)"[Supplementary Concept] OR "atrial natriuretic factor prohormone (102-126)") OR ("atrial natriuretic factor prohormone (103-126)"[Supplementary Concept] OR "atrial natriuretic factor prohormone (103-126)") OR ("atrial natriuretic factor prohormone (95-126)"[Supplementary Concept] OR "atrial natriuretic factor prohormone (95-126)") OR (azosemid[Supplementary Concept] OR "azosemid") OR (Bendroflumethiazide[MeSH] OR "Bendroflumethiazide") OR (Bumetanide[MeSH] OR "Bumetanide") OR (Chlorothiazide[MeSH] OR "Chlorothiazide") OR (Chlorthalidone[MeSH] OR "Chlorthalidone") OR (Clopamide[MeSH] OR "Clopamide") OR (cycletanide[Supplementary Concept] OR "cycletanide") OR (Cyclopenthiazide[MeSH] OR "Cyclopenthiazide") OR (cyclothiazide[Supplementary Concept] OR "cyclothiazide") OR (E 2078[Supplementary Concept] OR "E 2078") OR (efonidipine[Supplementary Concept] OR "efonidipine") OR (Ethacrynic Acid[MeSH] OR "Ethacrynic Acid") OR (ethanolamine O-sulfate[Supplementary Concept] OR "ethanolamine O-sulfate") OR (Ethoxzolamide[MeSH] OR "Ethoxzolamide") OR (etozolin[Supplementary Concept] OR "etozolin") OR (fenquizone[Supplementary Concept] OR "fenquizone") OR (Furosemide[MeSH] OR "Furosemide") OR (Hydrochlorothiazide[MeSH] OR "Hydrochlorothiazide") OR (Hydroflumethiazide[MeSH] OR "Hydroflumethiazide") OR (ibopamine[Supplementary Concept] OR "ibopamine") OR (indanone[Supplementary Concept] OR "indanone") OR (Indapamide[MeSH] OR "Indapamide") OR (Isosorbide[MeSH] OR "Isosorbide") OR (Mannitol[MeSH] OR "Mannitol") OR (Mefruside[MeSH] OR "Mefruside") OR (Methazolamide[MeSH] OR "Methazolamide") OR (Methyclothiazide[MeSH] OR "Methyclothiazide") OR (Metolazone[MeSH] OR "Metolazone") OR (MK 473[Supplementary Concept] OR "MK 473") OR (Muzolimine[MeSH] OR "Muzolimine") OR (ozolinone[Supplementary Concept] OR "ozolinone") OR (piretanide[Supplementary Concept] OR "piretanide") OR (Polythiazide[MeSH] OR "Polythiazide") OR (Potassium Citrate[MeSH] OR "Potassium Citrate") OR (spiradoline[Supplementary Concept] OR "spiradoline") OR (Spironolactone[MeSH] OR "Spironolactone") OR (Ticrynafen[MeSH] OR "Ticrynafen") OR |

|   |                                                                                                                                                                                                                                                                                                                                                                                                                                                                                                                                                                                                                                                                                                                                                                                                                                                                                                                                                                                                                                                                                                                                                                                                                                                                                                                                                                                                                                                                                                                                                                                                                                                                                                                                                                                                                                                                                                                                                                                                                                                                                                                                                                                                                                                                                                                                                                                                                                                                                                                                                                                                                                                                                                                                                                                                                                                                                                                                                                                                                                                                                                                                                                                                                                                                                                                                                                                                                                                                                                                                                                                                                                                                                                                                                                                                                                                                                                                                                                                                                                                                                                                                                                                                                                                                                                                                                                                                                                          |
|---|------------------------------------------------------------------------------------------------------------------------------------------------------------------------------------------------------------------------------------------------------------------------------------------------------------------------------------------------------------------------------------------------------------------------------------------------------------------------------------------------------------------------------------------------------------------------------------------------------------------------------------------------------------------------------------------------------------------------------------------------------------------------------------------------------------------------------------------------------------------------------------------------------------------------------------------------------------------------------------------------------------------------------------------------------------------------------------------------------------------------------------------------------------------------------------------------------------------------------------------------------------------------------------------------------------------------------------------------------------------------------------------------------------------------------------------------------------------------------------------------------------------------------------------------------------------------------------------------------------------------------------------------------------------------------------------------------------------------------------------------------------------------------------------------------------------------------------------------------------------------------------------------------------------------------------------------------------------------------------------------------------------------------------------------------------------------------------------------------------------------------------------------------------------------------------------------------------------------------------------------------------------------------------------------------------------------------------------------------------------------------------------------------------------------------------------------------------------------------------------------------------------------------------------------------------------------------------------------------------------------------------------------------------------------------------------------------------------------------------------------------------------------------------------------------------------------------------------------------------------------------------------------------------------------------------------------------------------------------------------------------------------------------------------------------------------------------------------------------------------------------------------------------------------------------------------------------------------------------------------------------------------------------------------------------------------------------------------------------------------------------------------------------------------------------------------------------------------------------------------------------------------------------------------------------------------------------------------------------------------------------------------------------------------------------------------------------------------------------------------------------------------------------------------------------------------------------------------------------------------------------------------------------------------------------------------------------------------------------------------------------------------------------------------------------------------------------------------------------------------------------------------------------------------------------------------------------------------------------------------------------------------------------------------------------------------------------------------------------------------------------------------------------------------------------------------|
|   | (tifluadom[Supplementary Concept] OR "tifluadom") OR (torsemide[Supplementary Concept] OR "torsemide") OR (traxanox[Supplementary Concept] OR "traxanox") OR (Triamterene[MeSH] OR "Triamterene") OR (Trichlormethiazide[MeSH] OR "Trichlormethiazide") OR (U 37883A[Supplementary Concept] OR "U 37883A") OR (U 69593[Supplementary Concept] OR "U 69593") OR (Xipamide[MeSH] OR "Xipamide")                                                                                                                                                                                                                                                                                                                                                                                                                                                                                                                                                                                                                                                                                                                                                                                                                                                                                                                                                                                                                                                                                                                                                                                                                                                                                                                                                                                                                                                                                                                                                                                                                                                                                                                                                                                                                                                                                                                                                                                                                                                                                                                                                                                                                                                                                                                                                                                                                                                                                                                                                                                                                                                                                                                                                                                                                                                                                                                                                                                                                                                                                                                                                                                                                                                                                                                                                                                                                                                                                                                                                                                                                                                                                                                                                                                                                                                                                                                                                                                                                                            |
| 3 | Adrenergic alpha-Antagonists[MeSH] OR Adrenergic alpha-Antagonists[Pharmacological Action] OR ("Adrenergic alpha-Antagonists" OR "Adrenergic alpha-Antagonist") OR ("Adrenergic alpha Antagonists" OR "Adrenergic alpha Antagonist ") OR ("Adrenergic alpha-Receptor Blockaders" OR "Adrenergic alpha-Receptor Blockader") OR ("Adrenergic alpha Receptor Blockaders" OR "Adrenergic alpha Receptor Blockader") OR ("alpha-Adrenergic Blocking Agents" OR "alpha-Adrenergic Blocking Agent") OR ("alpha Adrenergic Blocking Agents" OR "alpha Adrenergic Blocking Agent") OR ("alpha-Adrenergic Blockers" OR "alpha-Adrenergic Blocker") OR ("alpha Adrenergic Blockers" OR "alpha Adrenergic Blocker") OR ("alpha-Adrenergic Receptor Blockaders" OR "alpha-Adrenergic Receptor Blockader") OR ("alpha Adrenergic Receptor Blockaders" OR "alpha Adrenergic Receptor Blockader") OR ("Adrenergic alpha-Blockers" OR "Adrenergic alpha-Blocker") OR ("Adrenergic alpha Blockers" OR "Adrenergic alpha Blocker") OR ("(2-(2',6'-dimethoxy)phenoxyethylamino)methylbenzo-1,4-dioxane"[Supplementary Concept] OR "(2-(2',6'-dimethoxy)phenoxyethylamino)methylbenzo-1,4-dioxane") OR (1-(2-pyrimidinyl)piperazine[Supplementary Concept] OR "1-(2-pyrimidinyl)piperazine") OR (1-benzylimidazole[Supplementary Concept] OR "1-benzylimidazole") OR ("2-(beta-(3-iodo-4-hydroxyphenyl)ethylaminomethyl)tetralone"[Supplementary Concept] OR "2-(beta-(3-iodo-4-hydroxyphenyl)ethylaminomethyl)tetralone") OR (2-methoxyidazoxan[Supplementary Concept] OR "2-methoxyidazoxan") OR (5-methylurapidil[Supplementary Concept] OR "5-methylurapidil") OR ("7,8-(methylenedioxy)-14-hydroxyberbane"[Supplementary Concept] OR "7,8-(methylenedioxy)-14-hydroxyberbane") OR (alfuzosin[Supplementary Concept] OR "alfuzosin") OR (amosulalol[Supplementary Concept] OR "amosulalol") OR (AR-C239[Supplementary Concept] OR "AR-C239") OR (arotinolol[Supplementary Concept] OR "arotinolol") OR (atipamezole[Supplementary Concept] OR "atipamezole") OR (BE 2254[Supplementary Concept] OR "BE 2254") OR (benalfocin[Supplementary Concept] OR "benalfocin") OR (benextramine[Supplementary Concept] OR "benextramine") OR (benoxathian[Supplementary Concept] OR "benoxathian") OR (BMY 7378[Supplementary Concept] OR "BMY 7378") OR (BRL 44408[Supplementary Concept] OR "BRL 44408") OR (bucindolol[Supplementary Concept] OR "bucindolol") OR (bunazosin[Supplementary Concept] OR "bunazosin") OR (carvedilol[Supplementary Concept] OR "carvedilol") OR (chlorethylclonidine[Supplementary Concept] OR "chlorethylclonidine") OR (dapiprazole[Supplementary Concept] OR "dapiprazole") OR (Dibenzylchlorethamine[MeSH] OR "Dibenzylchlorethamine") OR (Dihydroergotoxine[MeSH] OR "Dihydroergotoxine ") OR (Doxazosin[MeSH] OR "Doxazosin") OR (EEDQ[Supplementary Concept] OR "EEDQ") OR (efaroxan[Supplementary Concept] OR "efaroxan") OR (Ergoloid Mesylates[MeSH] OR "Ergoloid Mesylates" OR "Ergoloid Mesylate") OR (Idazoxan[MeSH] OR "Idazoxan") OR (ifenprodil[Supplementary Concept] OR "ifenprodil") OR (Indoramin[MeSH] OR "Indoramin") OR (K 351[Supplementary Concept] OR "K 351") OR (L 657743[Supplementary Concept] OR "L 657743") OR (Labetalol[MeSH] OR "Labetalol") OR (medroxalol[Supplementary Concept] OR "medroxalol") OR (Mianserin[MeSH] OR "Mianserin") OR (midaglizole[Supplementary Concept] OR "midaglizole") OR (mirtazapine[Supplementary Concept] OR "mirtazapine") OR (monatepil[Supplementary Concept] OR "monatepil") OR (Moxisylyte[MeSH] OR "Moxisylyte") OR (naftopidil[Supplementary Concept] OR "naftopidil") OR (Nicergoline[MeSH] OR "Nicergoline") OR (Phenoxybenzamine[MeSH] OR "Phenoxybenzamine") OR (Phentolamine[MeSH] OR "Phentolamine") OR (phenylpiperazine[Supplementary Concept] OR "phenylpiperazine") OR (Piperoxan[MeSH] OR "Piperoxan") OR (Prazosin[MeSH] OR "Prazosin") OR (proroxan[Supplementary Concept] OR "proroxan") OR (Quinidine[MeSH] OR "Quinidine") OR ("SK^&F 104078"[Supplementary Concept] OR "SK^&F 104078") OR (tamsulosin[Supplementary Concept] OR "tamsulosin") OR (Terazosin[Supplementary Concept] OR "Terazosin") OR (Tolazoline[MeSH] OR "Tolazoline") OR (trimazosin[Supplementary Concept] OR "trimazosin") OR (urapidil[Supplementary Concept] OR "urapidil") OR (YM 12617[Supplementary Concept] OR "YM 12617") OR (Yohimbine[MeSH] OR "Yohimbine") |
| 4 | Calcium Channel Blockers[MeSH] OR Calcium Channel Blockers[Pharmacological Action] OR ("Calcium Channel Blockers" OR "Calcium Channel Blocker") OR ("Exogenous Calcium Blockaders" OR "Exogenous Calcium Blockader") OR ("Calcium Channel Blocking Drugs" OR "Channel Blocking Drug")                                                                                                                                                                                                                                                                                                                                                                                                                                                                                                                                                                                                                                                                                                                                                                                                                                                                                                                                                                                                                                                                                                                                                                                                                                                                                                                                                                                                                                                                                                                                                                                                                                                                                                                                                                                                                                                                                                                                                                                                                                                                                                                                                                                                                                                                                                                                                                                                                                                                                                                                                                                                                                                                                                                                                                                                                                                                                                                                                                                                                                                                                                                                                                                                                                                                                                                                                                                                                                                                                                                                                                                                                                                                                                                                                                                                                                                                                                                                                                                                                                                                                                                                                    |

OR ("Exogenous Calcium Inhibitors" OR "Exogenous Calcium Inhibitor") OR "Exogenous Calcium Antagonists" OR "Exogenous Calcium Antagonist") OR ("1-(2-(3-(4-methoxyphenyl)propoxy)-4-methoxyphenylethyl)-1H-imidazole"[Supplementary Concept] OR "1-(2-(3-(4-methoxyphenyl)propoxy)-4-methoxyphenylethyl)-1H-imidazole") OR ("1,4-dihydropyridine"[Supplementary Concept] OR "1,4-dihydropyridine") OR (2-(4-(dimethylamino)styryl)-1-methylpyridinium[Supplementary Concept] OR "2-(4-(dimethylamino)styryl)-1-methylpyridinium") OR ("8-(N,N-diethylamino)octyl-3,4,5-trimethoxybenzoate"[Supplementary Concept] OR "8-(N,N-diethylamino)octyl-3,4,5-trimethoxybenzoate") OR (AE0047[Supplementary Concept] OR "AE0047") OR (Amlodipine[MeSH] OR "Amlodipine") OR ("amlodipine, atorvastatin drug combination"[Supplementary Concept] OR "amlodipine, atorvastatin drug combination") OR (Amrinone[MeSH] OR "Amrinone") OR (anandamide[Supplementary Concept] OR "anandamide") OR (anipamil[Supplementary Concept] OR "anipamil") OR (azimilide[Supplementary Concept] OR "azimilide") OR (Bencyclane[MeSH] OR "Bencyclane") OR (benidipine[Supplementary Concept] OR "benidipine") OR (Bepriidil[MeSH] OR "Bepriidil") OR (berbamine[Supplementary Concept] OR "berbamine") OR (canadine[Supplementary Concept] OR "canadine") OR (carboxyamido-triazole[Supplementary Concept] OR "carboxyamido-triazole") OR (caroverine[Supplementary Concept] OR "caroverine") OR (CD 349[Supplementary Concept] OR "CD 349") OR (cilnidipine[Supplementary Concept] OR "cilnidipine") OR (Cinnarizine[MeSH] OR "Cinnarizine") OR (clentiazem[Supplementary Concept] OR "clentiazem") OR (Conotoxins[MeSH] OR "Conotoxins" OR "Conotoxin") OR (Conus magus toxin[Supplementary Concept] OR "Conus magus toxin") OR (darodipine[Supplementary Concept] OR "darodipine") OR (dauricine[Supplementary Concept] OR "dauricine") OR (devapamil[Supplementary Concept] OR "devapamil") OR (Diltiazem[MeSH] OR "Diltiazem") OR (dimedtiapramine[Supplementary Concept] OR "dimedtiapramine") OR (dotarizine[Supplementary Concept] OR "dotarizine") OR (efonidipine[Supplementary Concept] OR "efonidipine") OR (emopamil[Supplementary Concept] OR "emopamil") OR (enpiperate[Supplementary Concept] OR "enpiperate") OR (eperisone[Supplementary Concept] OR "eperisone") OR (falipamil[Supplementary Concept] OR "falipamil") OR (fantofarone[Supplementary Concept] OR "fantofarone") OR (fasudil[Supplementary Concept] OR "fasudil") OR (Felodipine[MeSH] OR "Felodipine") OR (fenamic acid[Supplementary Concept] OR "fenamic acid") OR (Fendiline[MeSH] OR "Fendiline") OR (Flunarizine[MeSH] OR "Flunarizine") OR (fosfedil[Supplementary Concept] OR "fosfedil") OR ("FTX, spider toxin"[Supplementary Concept] OR "FTX, spider toxin") OR (gabapentin[Supplementary Concept] OR "gabapentin") OR (Gallopamil[MeSH] OR "Gallopamil") OR (IH 764-3[Supplementary Concept] OR "IH 764-3") OR (Isradipine[MeSH] OR "Isradipine") OR (KB 2796[Supplementary Concept] OR "KB 2796") OR (KT 362[Supplementary Concept] OR "KT 362") OR (KW 3049[Supplementary Concept] OR "KW 3049") OR (lacidipine[Supplementary Concept] OR "lacidipine") OR (lamotrigine[Supplementary Concept] OR "lamotrigine") OR (Iercanidipine[Supplementary Concept] OR "Iercanidipine") OR (Lidoflazine[MeSH] OR "Lidoflazine") OR (Magnesium Sulfate[MeSH] OR "Magnesium Sulfate") OR (manidipine[Supplementary Concept] OR "manidipine") OR (manoalide[Supplementary Concept] OR "manoalide") OR (mepirodipine[Supplementary Concept] OR "mepirodipine") OR (Mibefradil[MeSH] OR "Mibefradil") OR (monatepil[Supplementary Concept] OR "monatepil") OR ("N-(2-guanidinoethyl)-5-isoquinolinesulfonamide"[Supplementary Concept] OR "N-(2-guanidinoethyl)-5-isoquinolinesulfonamide") OR (naftopidil[Supplementary Concept] OR "naftopidil") OR (Nicardipine[MeSH] OR "Nicardipine") OR (Nifedipine[MeSH] OR "Nifedipine") OR (niguldipine[Supplementary Concept] OR "niguldipine") OR (niludipin[Supplementary Concept] OR "niludipin") OR (nilvadipine[Supplementary Concept] OR "nilvadipine") OR (Nimodipine[MeSH] OR "Nimodipine") OR (Nisoldipine[MeSH] OR "Nisoldipine") OR (Nitrendipine[MeSH] OR "Nitrendipine") OR (norverapamil[Supplementary Concept] OR "norverapamil") OR (NS 21[Supplementary Concept] OR "NS 21") OR (ochratoxin A[Supplementary Concept] OR "ochratoxin A") OR (octylonium[Supplementary Concept] OR "octylonium") OR (omega-Agatoxin IVA[MeSH] OR "omega-Agatoxin IVA") OR (omega-Conotoxin GVIA[MeSH] OR "omega-Conotoxin GVIA") OR (omega-conotoxin-MV1IC[Supplementary Concept] OR "omega-conotoxin-MV1IC") OR (omega-Conotoxins[MeSH] OR "omega-Conotoxin" OR "omega-Conotoxin") OR (osthol[Supplementary Concept] OR "osthol") OR (oxodipine[Supplementary Concept] OR "oxodipine") OR (Perhexiline[MeSH] OR "Perhexiline") OR (pinaverium[Supplementary Concept] OR "pinaverium") OR (piperidine[Supplementary Concept] OR "piperidine") OR (PN 202-791[Supplementary Concept] OR "PN 202-791") OR (pranidipine[Supplementary Concept] OR "pranidipine") OR (Prenylamine[MeSH] OR "Prenylamine") OR (R 56865[Supplementary Concept] OR "R 56865") OR (risedronic acid[Supplementary Concept] OR "risedronic acid") OR (ryodipine[Supplementary Concept] OR

|   |                                                                                                                                                                                                                                                                                                                                                                                                                                                                                                                                                                                                                                                                                                                                                                                                                                                                                                                                                                                                                                                                                                                                                                                                                                                                                                                                                                                                                                                                                                                                                                                                                                                                                                                                                                                                                                                                                                                                                                                                                                                                                                                                                                                                                                                                                                                                                                                                                                                                                                                                                                                                                                                                                                                                                                                                                                                                                                                                                                                                                                                                                                                                                                                                                                                                                                                                                                                                                                                                                                                                                                                                                                                                                                   |
|---|---------------------------------------------------------------------------------------------------------------------------------------------------------------------------------------------------------------------------------------------------------------------------------------------------------------------------------------------------------------------------------------------------------------------------------------------------------------------------------------------------------------------------------------------------------------------------------------------------------------------------------------------------------------------------------------------------------------------------------------------------------------------------------------------------------------------------------------------------------------------------------------------------------------------------------------------------------------------------------------------------------------------------------------------------------------------------------------------------------------------------------------------------------------------------------------------------------------------------------------------------------------------------------------------------------------------------------------------------------------------------------------------------------------------------------------------------------------------------------------------------------------------------------------------------------------------------------------------------------------------------------------------------------------------------------------------------------------------------------------------------------------------------------------------------------------------------------------------------------------------------------------------------------------------------------------------------------------------------------------------------------------------------------------------------------------------------------------------------------------------------------------------------------------------------------------------------------------------------------------------------------------------------------------------------------------------------------------------------------------------------------------------------------------------------------------------------------------------------------------------------------------------------------------------------------------------------------------------------------------------------------------------------------------------------------------------------------------------------------------------------------------------------------------------------------------------------------------------------------------------------------------------------------------------------------------------------------------------------------------------------------------------------------------------------------------------------------------------------------------------------------------------------------------------------------------------------------------------------------------------------------------------------------------------------------------------------------------------------------------------------------------------------------------------------------------------------------------------------------------------------------------------------------------------------------------------------------------------------------------------------------------------------------------------------------------------------|
|   | <p>“ryodipine”) OR (SAN 202791[Supplementary Concept] OR “SAN 202791”) OR (sesamodil[Supplementary Concept] OR “sesamodil”) OR (stepholidine[Supplementary Concept] OR “stepholidine”) OR (terodiline[Supplementary Concept] OR “terodiline”) OR (tetrahydropalmatine[Supplementary Concept] OR “tetrahydropalmatine”) OR (tetrandrine[Supplementary Concept] OR “tetrandrine”) OR (tolfenamic acid[Supplementary Concept] OR “tolfenamic acid”) OR (tranilast[Supplementary Concept] OR “tranilast”) OR (Verapamil[MeSH] OR “Verapamil”) OR (Win 55212-2[Supplementary Concept] OR “Win 55212-2”) OR (ziconotide[Supplementary Concept] OR “ziconotide”)</p>                                                                                                                                                                                                                                                                                                                                                                                                                                                                                                                                                                                                                                                                                                                                                                                                                                                                                                                                                                                                                                                                                                                                                                                                                                                                                                                                                                                                                                                                                                                                                                                                                                                                                                                                                                                                                                                                                                                                                                                                                                                                                                                                                                                                                                                                                                                                                                                                                                                                                                                                                                                                                                                                                                                                                                                                                                                                                                                                                                                                                                     |
| 5 | <p>Ganglionic Blockers[MeSH] OR Ganglionic Blockers[Pharmacological Action] OR (“Ganglionic Blockers” OR “Ganglionic Blocker”) OR (“Ganglioplegic Agents” OR “Ganglioplegic Agent”) OR (“Ganglionic Blockaders” OR “Ganglionic Blockader”) OR “Ganglionic Blocking Agents” OR “Ganglionic Blocking Agent” OR (benzohexonium[Supplementary Concept] OR “benzohexonium”) OR (Chlorisondamine[MeSH] OR “Chlorisondamine”) OR (Hexamethonium[MeSH] OR “Hexamethonium”) OR (Hexamethonium Compounds[MeSH] OR “Hexamethonium Compounds” OR “Hexamethonium Compound”) OR (Mecamylamine[MeSH] OR “Mecamylamine”) OR (Pempidine[MeSH] OR “Pempidine”) OR (pentamine[Supplementary Concept] OR “pentamine”) OR (Pentolinium Tartrate[MeSH] OR “Pentolinium Tartrate”) OR (Trimethaphan[MeSH] OR “Trimethaphan”)</p>                                                                                                                                                                                                                                                                                                                                                                                                                                                                                                                                                                                                                                                                                                                                                                                                                                                                                                                                                                                                                                                                                                                                                                                                                                                                                                                                                                                                                                                                                                                                                                                                                                                                                                                                                                                                                                                                                                                                                                                                                                                                                                                                                                                                                                                                                                                                                                                                                                                                                                                                                                                                                                                                                                                                                                                                                                                                                         |
| 6 | <p>Vasodilator Agents[MeSH] OR Vasodilator Agents[Pharmacological Action] OR (“Vasodilator Agents” OR “Vasodilator Agent”) OR (“Vasodilators” OR “Vasodilator”) OR (“Vasorelaxants” OR “Vasorelaxant”) OR (“Vasodilator Drugs” OR “Vasodilator Drug”) OR (“Vasoactive Antagonists” OR “Vasoactive Antagonist”) OR (1-0-octadecyl 2-0-acetyl sn-glycero-3-phosphorylcholine[Supplementary Concept] OR “1-0-octadecyl 2-0-acetyl sn-glycero-3-phosphorylcholine”) OR (“11,12-epoxy-5,8,14-eicosatrienoic acid”[Supplementary Concept] OR “11,12-epoxy-5,8,14-eicosatrienoic acid”) OR (11-bromovincamine[Supplementary Concept] OR “11-bromovincamine”) OR (“14,15-epoxy-5,8,11-eicosatrienoic acid”[Supplementary Concept] OR “14,15-epoxy-5,8,11-eicosatrienoic acid”) OR (2-phenylaminoadenosine[Supplementary Concept] OR “2-phenylaminoadenosine”) OR (“3-(cis-2,6-dimethylpiperidino)sydnonimine”[Supplementary Concept] OR “3-(cis-2,6-dimethylpiperidino)sydnonimine”) OR (3-morpholino-sydnonimine[Supplementary Concept] OR “3-morpholino-sydnonimine”) OR (6-ketoprostaglandin E1[Supplementary Concept] OR “6-ketoprostaglandin E1”) OR (“8,9-epoxyeicosatrienoic acid”[Supplementary Concept] OR “8,9-epoxyeicosatrienoic acid”) OR (Acetylcholine [MeSH Term] OR “Acetylcholine”) OR (Adenosine [MeSH Term] OR “Adenosine”) OR (“Adenosine-5’-(N-ethylcarboxamide)” [MeSH Term] OR “Adenosine-5’-(N-ethylcarboxamide)”) OR (Adrenomedullin [MeSH Term] OR “Adrenomedullin”) OR (AE0047[Supplementary Concept] OR “AE0047”) OR (ajmalicine[Supplementary Concept] OR “ajmalicine”) OR (Alprostadiil [MeSH Term] OR “Alprostadiil”) OR (Amiodarone [MeSH Term] OR “Amiodarone”) OR (Amlodipine [MeSH Term] OR “Amlodipine”) OR (Amrinone [MeSH Term] OR “Amrinone”) OR (Amyl Nitrite [MeSH Term] OR “Amyl Nitrite”) OR (“angiotensin II (1-7)”[Supplementary Concept] OR “angiotensin II (1-7)”) OR (anisodamine[Supplementary Concept] OR “anisodamine”) OR (aprikalim[Supplementary Concept] OR “aprikalim”) OR (bamethan[Supplementary Concept] OR “bamethan”) OR (bamifylline[Supplementary Concept] OR “bamifylline”) OR (Bencyclane [MeSH Term] OR “Bencyclane”) OR (benidipine[Supplementary Concept] OR “benidipine”) OR (Bepridil [MeSH Term] OR “Bepridil”) OR (beraprost[Supplementary Concept] OR “beraprost”) OR (Betahistine [MeSH Term] OR “Betahistine”) OR (bimakalim[Supplementary Concept] OR “bimakalim”) OR (BMS 180448[Supplementary Concept] OR “BMS 180448”) OR (BQ 22-708[Supplementary Concept] OR “BQ 22-708”) OR (Bradykinin [MeSH Term] OR “Bradykinin”) OR (bucindolol[Supplementary Concept] OR “bucindolol”) OR (buflomedil[Supplementary Concept] OR “buflomedil”) OR (“butalamine”[Supplementary Concept] OR “butalamine”) OR (cadralazine[Supplementary Concept] OR “cadralazine”) OR (Calcitonin Gene-Related Peptide [MeSH Term] OR “Calcitonin Gene-Related Peptide”) OR (cardiodilatin[Supplementary Concept] OR “cardiodilatin”) OR (carvedilol[Supplementary Concept] OR “carvedilol”) OR (Celiprolol [MeSH Term] OR “Celiprolol”) OR (cetiedil[Supplementary Concept] OR “cetiedil”) OR (Chromonar [MeSH Term] OR “Chromonar”) OR (ciclosidomine[Supplementary Concept] OR “ciclosidomine”) OR (cilostazol[Supplementary Concept] OR “cilostazol”) OR (colforsin[Supplementary Concept] OR “colforsin”) OR (convallatoxin[Supplementary Concept] OR “convallatoxin”) OR (Cromakalim [MeSH Term] OR “Cromakalim”) OR (Cyclandelate [MeSH Term] OR “Cyclandelate”) OR (cyclopiazonic acid[Supplementary Concept] OR “cyclopiazonic acid”) OR (dazmegrel[Supplementary Concept] OR “dazmegrel”) OR (Diazoxide [MeSH Term] OR “Diazoxide”) OR</p> |



(Dihydroergocristine [MeSH Term] OR "Dihydroergocristine") OR (Dihydroergocryptine [MeSH Term] OR "Dihydroergocryptine") OR (Dilazep [MeSH Term] OR "Dilazep") OR (Diltiazem [MeSH Term] OR "Diltiazem") OR (dimephosphon[Supplementary Concept] OR "dimephosphon") OR (Dipyridamole [MeSH Term] OR "Dipyridamole") OR (dopexamine[Supplementary Concept] OR "dopexamine") OR (dotarizine[Supplementary Concept] OR "dotarizine") OR (drotaverin[Supplementary Concept] OR "drotaverin") OR (Dyphylline [MeSH Term] OR "Dyphylline") OR (eburnamonine[Supplementary Concept] OR "eburnamonine") OR (endothelium-dependent hyperpolarization factor[Supplementary Concept] OR "endothelium-dependent hyperpolarization factor") OR (Enoximone [MeSH Term] OR "Enoximone") OR (eperisone[Supplementary Concept] OR "eperisone") OR (Ergoloid Mesylates [MeSH Term] OR "Ergoloid Mesylates") OR (Erythritol [MeSH Term] OR "Erythritol") OR (Erythrityl Tetranitrate [MeSH Term] OR "Erythrityl Tetranitrate") OR (etafenone[Supplementary Concept] OR "etafenone") OR (fantofarone[Supplementary Concept] OR "fantofarone") OR (fasudil[Supplementary Concept] OR "fasudil") OR (Felodipine [MeSH Term] OR "Felodipine") OR (Fenoldopam [MeSH Term] OR "Fenoldopam") OR (fenozan[Supplementary Concept] OR "fenozan") OR (FK 409[Supplementary Concept] OR "FK 409") OR (flosequinan[Supplementary Concept] OR "flosequinan") OR (Flunarizine [MeSH Term] OR "Flunarizine") OR ("glyceryl-1,3-dinitrate"[Supplementary Concept] OR "glyceryl-1,3-dinitrate") OR (Hexobendine [MeSH Term] OR "Hexobendine") OR (Hydralazine [MeSH Term] OR "Hydralazine") OR (ibopamine[Supplementary Concept] OR "ibopamine") OR (ibudilast[Supplementary Concept] OR "ibudilast") OR (ifenprodil[Supplementary Concept] OR "ifenprodil") OR (Iloprost [MeSH Term] OR "Iloprost") OR (imolamine[Supplementary Concept] OR "imolamine") OR (indenolol[Supplementary Concept] OR "indenolol") OR (Inositol Niacinate[Supplementary Concept] OR "Inositol Niacinate") OR (isobutyl nitrite[Supplementary Concept] OR "isobutyl nitrite") OR (Isosorbide Dinitrate [MeSH Term] OR "Isosorbide Dinitrate") OR (isosorbide-5-mononitrate[Supplementary Concept] OR "isosorbide-5-mononitrate") OR (Isoxsuprine [MeSH Term] OR "Isoxsuprine") OR (Isradipine [MeSH Term] OR "Isradipine") OR (K 351[Supplementary Concept] OR "K 351") OR (Kallidin [MeSH Term] OR "Kallidin") OR (Khellin [MeSH Term] OR "Khellin") OR (KT 362[Supplementary Concept] OR "KT 362") OR (Lidoflazine [MeSH Term] OR "Lidoflazine") OR ("maxadilan protein, insect"[Supplementary Concept] OR "maxadilan protein, insect") OR (MCI 154[Supplementary Concept] OR "MCI 154") OR (Mibefradil [MeSH Term] OR "Mibefradil") OR (Milrinone [MeSH Term] OR "Milrinone") OR (Minoxidil [MeSH Term] OR "Minoxidil") OR (Molsidomine [MeSH Term] OR "Molsidomine") OR (Moxisylyte [MeSH Term] OR "Moxisylyte") OR (N-(1-methyl-2-phenylethyl)adenosine[Supplementary Concept] OR "N-(1-methyl-2-phenylethyl)adenosine") OR (n-butyl nitrite[Supplementary Concept] OR "n-butyl nitrite") OR ("N-cyano-N'-(1,1-dimethylpropyl)-N'-(3-pyridinyl)guanidine"[Supplementary Concept] OR "N-cyano-N'-(1,1-dimethylpropyl)-N'-(3-pyridinyl)guanidine") OR ("N-cyano-N'-(2-nitroxyethyl)-3-pyridinecarboximidamide methanesulfonate"[Supplementary Concept] OR "N-cyano-N'-(2-nitroxyethyl)-3-pyridinecarboximidamide methanesulfonate") OR (Nafronyl [MeSH Term] OR "Nafronyl") OR (neбиволол[Supplementary Concept] OR "neбиволол") OR (Niacin [MeSH Term] OR "Niacin") OR (nicametate[Supplementary Concept] OR "nicametate") OR (Nicardipine [MeSH Term] OR "Nicardipine") OR (Nicergoline [MeSH Term] OR "Nicergoline") OR (nicofuranose[Supplementary Concept] OR "nicofuranose") OR (Nicorandil [MeSH Term] OR "Nicorandil") OR (Nicotiny Alcohol [MeSH Term] OR "Nicotiny Alcohol") OR (Nifedipine [MeSH Term] OR "Nifedipine") OR (Nimodipine [MeSH Term] OR "Nimodipine") OR (NIP 121[Supplementary Concept] OR "NIP 121") OR (Nisoldipine [MeSH Term] OR "Nisoldipine") OR (Nitrendipine [MeSH Term] OR "Nitrendipine") OR (Nitric Oxide [MeSH Term] OR "Nitric Oxide") OR (Nitroglycerin [MeSH Term] OR "Nitroglycerin") OR (Nitroprusside [MeSH Term] OR "Nitroprusside") OR (nociceptin[Supplementary Concept] OR "nociceptin") OR (nocloprost[Supplementary Concept] OR "nocloprost") OR (Nonachlazine [MeSH Term] OR "Nonachlazine") OR (Nylidrin [MeSH Term] OR "Nylidrin") OR (oleuropein[Supplementary Concept] OR "oleuropein") OR (ONO 1206[Supplementary Concept] OR "ONO 1206") OR (Oxprenolol [MeSH Term] OR "Oxprenolol") OR (Oxyfedrine [MeSH Term] OR "Oxyfedrine") OR ("pancreatic extract, povidone drug combination"[Supplementary Concept] OR "pancreatic extract, povidone drug combination") OR (Papaverine [MeSH Term] OR "Papaverine") OR (Pentaerythritol Tetranitrate [MeSH Term] OR "Pentaerythritol Tetranitrate") OR (Pentoxifylline [MeSH Term] OR "Pentoxifylline") OR (Perhexiline [MeSH Term] OR "Perhexiline") OR (Phenoxybenzamine [MeSH Term] OR "Phenoxybenzamine") OR (pimobendan[Supplementary Concept] OR "pimobendan") OR (Pinacidil [MeSH Term] OR "Pinacidil") OR (Pindolol [MeSH Term] OR "Pindolol") OR (Pituitary Adenylate Cyclase-Activating Polypeptide [MeSH Term] OR "Pituitary Adenylate Cyclase-Activating Polypeptide") OR (Polymethyl Methacrylate [MeSH Term] OR "Polymethyl Methacrylate") OR

|   |                                                                                                                                                                                                                                                                                                                                                                                                                                                                                                                                                                                                                                                                                                                                                                                                                                                                                                                                                                                                                                                                                                                                                                                                                                                                                                                                                                                                                                                                                                                                                                                                                                                                                                                                                                                                                                                                                                                                                                                                                                                                                                                                                                                                                                                                                                                                                                                                                                                                                                                                                                                                                                                                                                                                                                                                                                                                                                                                                                                                                                                                                                                                                                                                                                                                   |
|---|-------------------------------------------------------------------------------------------------------------------------------------------------------------------------------------------------------------------------------------------------------------------------------------------------------------------------------------------------------------------------------------------------------------------------------------------------------------------------------------------------------------------------------------------------------------------------------------------------------------------------------------------------------------------------------------------------------------------------------------------------------------------------------------------------------------------------------------------------------------------------------------------------------------------------------------------------------------------------------------------------------------------------------------------------------------------------------------------------------------------------------------------------------------------------------------------------------------------------------------------------------------------------------------------------------------------------------------------------------------------------------------------------------------------------------------------------------------------------------------------------------------------------------------------------------------------------------------------------------------------------------------------------------------------------------------------------------------------------------------------------------------------------------------------------------------------------------------------------------------------------------------------------------------------------------------------------------------------------------------------------------------------------------------------------------------------------------------------------------------------------------------------------------------------------------------------------------------------------------------------------------------------------------------------------------------------------------------------------------------------------------------------------------------------------------------------------------------------------------------------------------------------------------------------------------------------------------------------------------------------------------------------------------------------------------------------------------------------------------------------------------------------------------------------------------------------------------------------------------------------------------------------------------------------------------------------------------------------------------------------------------------------------------------------------------------------------------------------------------------------------------------------------------------------------------------------------------------------------------------------------------------------|
|   | <p>(Prenylamine [MeSH Term] OR "Prenylamine") OR (prizidilol[Supplementary Concept] OR "prizidilol") OR (Propranolol [MeSH Term] OR "Propranolol") OR (puerarin[Supplementary Concept] OR "puerarin") OR (rutecarpine[Supplementary Concept] OR "rutecarpine") OR (ryodipine[Supplementary Concept] OR "ryodipine") OR (S-Nitroso-N-Acetylpenicillamine [MeSH Term] OR "S-Nitroso-N-Acetylpenicillamine") OR (S-nitrosocysteine[Supplementary Concept] OR "S-nitrosocysteine") OR (S-Nitrosoglutathione [MeSH Term] OR "S-Nitrosoglutathione") OR (S-Nitrosothiols [MeSH Term] OR "S-Nitrosothiols") OR (scoparone[Supplementary Concept] OR "scoparone") OR (siguazodan[Supplementary Concept] OR "siguazodan") OR (sildenafil[Supplementary Concept] OR "sildenafil") OR (simendan[Supplementary Concept] OR "simendan") OR (Sodium Azide [MeSH Term] OR "Sodium Azide") OR (Suloctidil [MeSH Term] OR "Suloctidil") OR (tadalafil[Supplementary Concept] OR "tadalafil") OR (tetramethylpyrazine[Supplementary Concept] OR "tetramethylpyrazine") OR (tezosentan[Supplementary Concept] OR "tezosentan") OR (Theobromine [MeSH Term] OR "Theobromine") OR (Theophylline [MeSH Term] OR "Theophylline") OR (Thiouracil [MeSH Term] OR "Thiouracil") OR (Tolazoline [MeSH Term] OR "Tolazoline") OR (torborinone[Supplementary Concept] OR "torborinone") OR (Trapidil [MeSH Term] OR "Trapidil") OR (triacsin C[Supplementary Concept] OR "triacsin C") OR (trimazosin[Supplementary Concept] OR "trimazosin") OR (Trimetazidine [MeSH Term] OR "Trimetazidine") OR (trimethaphan camsylate[Supplementary Concept] OR "trimethaphan camsylate") OR (urapidil[Supplementary Concept] OR "urapidil") OR (vardenafil[Supplementary Concept] OR "vardenafil") OR (Vasoactive Intestinal Peptide [MeSH Term] OR "Vasoactive Intestinal Peptide") OR (Verapamil [MeSH Term] OR "Verapamil") OR (Vincamine [MeSH Term] OR "Vincamine") OR (vinpocetine[Supplementary Concept] OR "vinpocetine") OR (W 7[Supplementary Concept] OR "W 7") OR (Xanthinol Niacinate [MeSH Term] OR "Xanthinol Niacinate")</p>                                                                                                                                                                                                                                                                                                                                                                                                                                                                                                                                                                                                                                                                                                                                                                                                                                                                                                                                                                                                                                                                                                                                                             |
| 7 | <p>Adrenergic beta-Antagonists[MeSH] OR ADRENERGIC BETA RECEPTOR BLOCKADERS[MeSH] OR Adrenergic beta-Antagonists [Pharmacological Action] OR ("Adrenergic beta-Antagonists" OR "Adrenergic beta-Antagonist") OR ("Adrenergic beta Antagonists" OR "Adrenergic beta Antagonist") OR ("beta-Adrenergic Receptor Blockaders" OR "beta-Adrenergic Receptor Blockader") OR ("beta Adrenergic Receptor Blockaders" OR "beta Adrenergic Receptor Blockader") OR ("beta-Adrenergic Blockers" OR "beta-Adrenergic Blocker") OR ("Adrenergic beta-Blockers" OR "Adrenergic beta-Blocker") OR ("Adrenergic beta-Receptor Blockaders" OR "Adrenergic beta-Receptor Blockader") OR ("Adrenergic beta Receptor Blockaders" OR "Adrenergic beta Receptor Blockader") OR ("beta-Adrenergic Blocking Agents" OR "beta-Adrenergic Blocking Agent") OR ("beta Adrenergic Blocking Agents" OR "beta Adrenergic Blocking Agent") OR ("beta blockers" OR "beta blocker") OR ("beta-blockers" OR "beta-blocker") OR (1-hexadecyl-2-acetyl-glycero-3-phosphocholine[Supplementary Concept] OR "1-hexadecyl-2-acetyl-glycero-3-phosphocholine") OR ("3-(2-ethylphenoxy)-1-(1,2,3,4-tetrahydronaphth-1-ylamino)-2-propanol oxalate"[Supplementary Concept] OR "3-(2-ethylphenoxy)-1-(1,2,3,4-tetrahydronaphth-1-ylamino)-2-propanol oxalate") OR (3-iodopindolol[Supplementary Concept] OR "3-iodopindolol") OR (5-hydroxypropafenone[Supplementary Concept] OR "5-hydroxypropafenone") OR (Acebutolol[MeSH] OR "Acebutolol") OR (Alprenolol[MeSH] OR "Alprenolol") OR (amosulalol[Supplementary Concept] OR "amosulalol") OR (arotinolol[Supplementary Concept] OR "arotinolol") OR (Atenolol[MeSH] OR "Atenolol") OR (befunolol[Supplementary Concept] OR "befunolol") OR (Betaxolol[MeSH] OR "Betaxolol") OR (bevantolol[Supplementary Concept] OR "bevantolol") OR (Bisoprolol[MeSH] OR "Bisoprolol") OR (bopindolol[Supplementary Concept] OR "bopindolol") OR (bromoacetylalprenololmenthane[Supplementary Concept] OR "bromoacetylalprenololmenthane") OR (bucindolol[Supplementary Concept] OR "bucindolol") OR (bufetolol[Supplementary Concept] OR "bufetolol") OR (bufuralol[Supplementary Concept] OR "bufuralol") OR (Bupranolol[MeSH] OR "Bupranolol") OR (butofilolol[Supplementary Concept] OR "butofilolol") OR (Butoxamine[MeSH] OR "Butoxamine") OR (carazolol[Supplementary Concept] OR "carazolol") OR (Carteolol[MeSH] OR "Carteolol") OR (carvedilol[Supplementary Concept] OR "carvedilol") OR (Celiprolol[MeSH] OR "Celiprolol") OR (CGP 12177[Supplementary Concept] OR "CGP 12177") OR (CGP 20712A[Supplementary Concept] OR "CGP 20712A") OR (cyanopindolol[Supplementary Concept] OR "cyanopindolol") OR (Dihydroalprenolol[MeSH] OR "Dihydroalprenolol") OR (epanolol[Supplementary Concept] OR "epanolol") OR (esmolol[Supplementary Concept] OR "esmolol") OR (exaprolol[Supplementary Concept] OR "exaprolol") OR (flestolol[Supplementary Concept] OR "flestolol") OR (icatibant[Supplementary Concept] OR "icatibant") OR (ICI 118551[Supplementary Concept] OR "ICI 118551") OR (ICI 89406[Supplementary Concept] OR "ICI 89406") OR (indenolol[Supplementary Concept] OR "indenolol ") OR (Iodocyanopindolol[MeSH] OR "Iodocyanopindolol") OR (IPS</p> |

|   |                                                                                                                                                                                                                                                                                                                                                                                                                                                                                                                                                                                                                                                                                                                                                                                                                                                                                                                                                                                                                                                                                                                                                                                                                                                                                                                                                                                                                                                                                                                                                                                                                                                                                                                                                                                                                                                                                                                                                                                                                                                                                                                                                                                                                                                                                                                                                                                                                                                                                                                                                                                                                                                                                                                                                                                                                                                                                                                                                                                                                                                                                    |
|---|------------------------------------------------------------------------------------------------------------------------------------------------------------------------------------------------------------------------------------------------------------------------------------------------------------------------------------------------------------------------------------------------------------------------------------------------------------------------------------------------------------------------------------------------------------------------------------------------------------------------------------------------------------------------------------------------------------------------------------------------------------------------------------------------------------------------------------------------------------------------------------------------------------------------------------------------------------------------------------------------------------------------------------------------------------------------------------------------------------------------------------------------------------------------------------------------------------------------------------------------------------------------------------------------------------------------------------------------------------------------------------------------------------------------------------------------------------------------------------------------------------------------------------------------------------------------------------------------------------------------------------------------------------------------------------------------------------------------------------------------------------------------------------------------------------------------------------------------------------------------------------------------------------------------------------------------------------------------------------------------------------------------------------------------------------------------------------------------------------------------------------------------------------------------------------------------------------------------------------------------------------------------------------------------------------------------------------------------------------------------------------------------------------------------------------------------------------------------------------------------------------------------------------------------------------------------------------------------------------------------------------------------------------------------------------------------------------------------------------------------------------------------------------------------------------------------------------------------------------------------------------------------------------------------------------------------------------------------------------------------------------------------------------------------------------------------------------|
|   | <p>339[Supplementary Concept] OR “IPS 339”) OR (K 351[Supplementary Concept] OR “K 351”) OR (Labetalol[MeSH] OR “Labetalol”) OR (landiolol[Supplementary Concept] OR “landiolol”) OR (Levobunolol[MeSH] OR “Levobunolol”) OR (medroxalol[Supplementary Concept] OR “medroxalol”) OR (mepindolol[Supplementary Concept] OR “mepindolol”) OR (Metipranolol[MeSH] OR “Metipranolol”) OR (Metoprolol[MeSH] OR “Metoprolol”) OR (metoprolol succinate[Supplementary Concept] OR “metoprolol succinate”) OR (Nadolol[MeSH] OR “Nadolol”) OR (nebivolol[Supplementary Concept] OR “nebivolol”) OR (Oxprenolol[MeSH] OR “Oxprenolol”) OR (Penbutolol[MeSH] OR “Penbutolol”) OR (Pindolol[MeSH] OR “Pindolol”) OR (Practolol[MeSH] OR “Practolol”) OR (prizidilol[Supplementary Concept] OR “prizidilol”) OR (Propranolol[MeSH] OR “Propranolol”) OR (Sotalol[MeSH] OR “Sotalol”) OR (talinalol[Supplementary Concept] OR “talinalol”) OR (tertatalol[Supplementary Concept] OR “tertatalol”) OR (tilisolol[Supplementary Concept] OR “tilisolol”) OR (Timolol[MeSH] OR “Timolol”) OR (tobanum[Supplementary Concept] OR “tobanum”)</p>                                                                                                                                                                                                                                                                                                                                                                                                                                                                                                                                                                                                                                                                                                                                                                                                                                                                                                                                                                                                                                                                                                                                                                                                                                                                                                                                                                                                                                                                                                                                                                                                                                                                                                                                                                                                                                                                                                                                                     |
| 8 | <p>Angiotensin-Converting Enzyme Inhibitors[MeSH] OR Enzyme Inhibitors[MeSH] OR Enzymes/antagonists and inhibitors[MeSH] OR Kininase II/antagonists and inhibitors[MeSH] OR Angiotensin-Converting Enzyme Inhibitors [Pharmacological Action] OR (“Angiotensin-Converting Enzyme Inhibitors” OR “Angiotensin-Converting Enzyme Inhibitor”) OR (“Angiotensin Converting Enzyme Inhibitors” OR “Angiotensin Converting Enzyme Inhibitor”) OR (“Angiotensin I-Converting Enzyme Inhibitors” OR “Angiotensin I-Converting Enzyme Inhibitor”) OR (“Angiotensin I Converting Enzyme Inhibitors” OR “Angiotensin I Converting Enzyme Inhibitor”) OR (“ACE Inhibitors” OR “ACE Inhibitor”) OR (“Kininase II Antagonists” OR “Kininase II Antagonist”) OR (“Kininase II Inhibitors” OR “Kininase II Inhibitor”) OR (“Angiotensin-Converting Enzyme Antagonists” OR “Angiotensin-Converting Enzyme Antagonist”) OR (“Angiotensin Converting Enzyme Antagonists” OR “Angiotensin Converting Enzyme Antagonist”) OR (“1-Sarcosine-8-Isoleucine Angiotensin II”[MeSH] OR “1-Sarcosine-8-Isoleucine Angiotensin II”) OR (“alacepril”[Supplementary Concept] OR “alacepril”) OR (“benazepril”[Supplementary Concept] OR “benazepril”) OR (“benazeprilat”[Supplementary Concept] OR “benazeprilat”) OR (“Captopril”[MeSH] OR “Captopril”) OR (“captopril, hydrochlorothiazide drug combination”[Supplementary Concept] OR “captopril, hydrochlorothiazide drug combination”) OR (“ceranapril”[Supplementary Concept] OR “ceranapril”) OR (“cilazaprilat”[Supplementary Concept] OR “cilazaprilat”) OR (“compound 351 A”[Supplementary Concept] OR “compound 351 A”) OR (“delapril”[Supplementary Concept] OR “delapril”) OR (“Enalapril”[MeSH] OR “Enalapril”) OR (“Enalaprilat”[MeSH] OR “Enalaprilat”) OR (Fosinopril[MeSH] OR “Fosinopril”) OR (“fosinoprilic acid”[Supplementary Concept] OR “fosinoprilic acid”) OR (“glyceraldehyde 3-phosphate dehydrogenase (304-313)”[Supplementary Concept] OR “glyceraldehyde 3-phosphate dehydrogenase (304-313)”) OR (imidapril[Supplementary Concept] OR “imidapril”) OR (libenzapril[Supplementary Concept] OR “libenzapril”) OR (Lisinopril[MeSH] OR “Lisinopril”) OR (moexipril[Supplementary Concept] OR “moexipril”) OR (omapatrilat[Supplementary Concept] OR “omapatrilat”) OR (Perindopril[MeSH] OR “Perindopril”) OR (perindoprilat[Supplementary Concept] OR “perindoprilat”) OR (quinapril[Supplementary Concept] OR “quinapril”) OR (quinaprilat[Supplementary Concept] OR “quinaprilat”) OR (Ramipril[MeSH] OR “Ramipril”) OR (ramiprilat[Supplementary Concept] OR “ramiprilat”) OR (rentiapril[Supplementary Concept] OR “rentiapril”) OR (Saralasin[MeSH] OR “Saralasin”) OR (spirapril[Supplementary Concept] OR “spirapril”) OR (telmisartan[Supplementary Concept] OR “telmisartan”) OR (temocapril hydrochloride[Supplementary Concept] OR “temocapril hydrochloride”) OR (Teprotide[MeSH] OR “Teprotide”) OR (trandolapril[Supplementary Concept] OR “trandolapril”) OR (zofenopril[Supplementary Concept] OR “zofenopril”)</p> |
| 9 | <p>Antihypertensive Agents[MeSH] OR Antihypertensive Agents [Pharmacological Action] OR (“Antihypertensives” OR “Antihypertensive”) OR (“Anti-Hypertensives” OR “Anti-Hypertensive”) OR (“Anti Hypertensives” OR “Anti Hypertensive”) OR (“Antihypertensive Drugs” OR “Antihypertensive Drug”) OR (“Anti-Hypertensive Drugs” OR “Anti-Hypertensive Drug”) OR (“Anti Hypertensive Drugs” OR “Anti Hypertensive Drug”) OR (“Antihypertensive Agents” OR “Antihypertensive Agent”) OR (“Anti-Hypertensive Agents” OR “Anti-Hypertensive Agent”) OR (“Anti Hypertensive Agents” OR “Anti Hypertensive Agent”) OR (1-0-octadecyl 2-0-acetyl sn-glycero-3-phosphorylcholine[Supplementary Concept] OR “1-0-octadecyl 2-0-acetyl sn-glycero-3-phosphorylcholine”) OR (1-hexadecyl-2-acetyl-glycero-3-phosphocholine[Supplementary Concept] OR “1-hexadecyl-2-acetyl-glycero-3-phosphocholine”) OR (1-Sarcosine-8-Isoleucine Angiotensin II[MeSH] OR “1-Sarcosine-8-Isoleucine Angiotensin II”) OR (“2-(4-(2-carboxyethyl)phenethylamino)-5'-N-ethylcarboxamidoadenosine”[Supplementary Concept] OR “2-(4-(2-carboxyethyl)phenethylamino)-5'-N-</p>                                                                                                                                                                                                                                                                                                                                                                                                                                                                                                                                                                                                                                                                                                                                                                                                                                                                                                                                                                                                                                                                                                                                                                                                                                                                                                                                                                                                                                                                                                                                                                                                                                                                                                                                                                                                                                                                                                                                        |

ethylcarboxamidoadenosine") OR ("3,4-Dichloro-N-methyl-N-(2-(1-pyrrolidinyl)-cyclohexyl)-benzeneacetamide, (trans)-Isomer"[MeSH] OR "3,4-Dichloro-N-methyl-N-(2-(1-pyrrolidinyl)-cyclohexyl)-benzeneacetamide, (trans)-Isomer") OR (3-morpholino-sydnonimine[Supplementary Concept] OR "3-morpholino-sydnonimine") OR (3-nitropropionic acid[Supplementary Concept] OR "3-nitropropionic acid") OR ("5-(dimethylamino)-N-(3,4-dimethyl-5-isoxazolyl)-1-naphthalenesulfonamide"[Supplementary Concept] OR "5-(dimethylamino)-N-(3,4-dimethyl-5-isoxazolyl)-1-naphthalenesulfonamide") OR (Acebutolol[MeSH] OR "Acebutolol") OR ("acebutolol, nifedipine drug combination"[Supplementary Concept] OR "acebutolol, nifedipine drug combination") OR (Adrenomedullin[MeSH] OR "Adrenomedullin") OR (AE0047[Supplementary Concept] OR "AE0047") OR (alfuzosin[Supplementary Concept] OR "alfuzosin") OR (Alprenolol[MeSH] OR "Alprenolol") OR (Amlodipine[MeSH] OR "Amlodipine") OR ("amlodipine, atorvastatin drug combination"[Supplementary Concept] OR "amlodipine, atorvastatin drug combination") OR ("amlodipine, valsartan drug combination"[Supplementary Concept] OR "amlodipine, valsartan drug combination") OR (amosulalol[Supplementary Concept] OR "amosulalol") OR ("angiotensin I (1-7)"[Supplementary Concept] OR "angiotensin I (1-7)") OR (aprikalim[Supplementary Concept] OR "aprikalim") OR ("atenolol, chlortalidone drug combinations"[Supplementary Concept] OR "atenolol, chlortalidone drug combinations") OR ("atrial natriuretic factor prohormone (103-126)"[Supplementary Concept] OR "atrial natriuretic factor prohormone (103-126)") OR (B-HT 933[Supplementary Concept] OR "B-HT 933") OR (benazepril[Supplementary Concept] OR "benazepril") OR (bendazole[Supplementary Concept] OR "bendazole") OR (Bendroflumethiazide[MeSH] OR "Bendroflumethiazide") OR (benoxathian[Supplementary Concept] OR "benoxathian") OR (Bepiridil[MeSH] OR "Bepiridil") OR (berbamine[Supplementary Concept] OR "berbamine") OR (Betaxolol[MeSH] OR "Betaxolol") OR (Bethanidine[MeSH] OR "Bethanidine") OR (bimakalim[Supplementary Concept] OR "bimakalim") OR (bimatoprost[Supplementary Concept] OR "bimatoprost") OR (bis(p-chlorophenyl)acetic acid[Supplementary Concept] OR "bis(p-chlorophenyl)acetic acid") OR (Bisoprolol[MeSH] OR "Bisoprolol") OR ("bisoprolol, hydrochlorothiazide drug combination"[Supplementary Concept] OR "bisoprolol, hydrochlorothiazide drug combination") OR (bosentan[Supplementary Concept] OR "bosentan") OR (BQ 22-708[Supplementary Concept] OR "BQ 22-708") OR (BQ 788[Supplementary Concept] OR "BQ 788") OR (Bretylum Tosylate[MeSH] OR "Bretylum Tosylate") OR (brimonidine[Supplementary Concept] OR "brimonidine") OR (Bupranolol[MeSH] OR "Bupranolol") OR (cadralazine[Supplementary Concept] OR "cadralazine") OR (candesartan[Supplementary Concept] OR "candesartan") OR (candesartan cilexetil[Supplementary Concept] OR "candesartan cilexetil") OR (candoxatriil[Supplementary Concept] OR "candoxatriil") OR (Captopril[MeSH] OR "Captopril") OR (Carteolol[MeSH] OR "Carteolol") OR (carvedilol[Supplementary Concept] OR "carvedilol") OR (Chlorisondamine[MeSH] OR "Chlorisondamine") OR (Chlorothiazide[MeSH] OR "Chlorothiazide") OR (Chlorthalidone[MeSH] OR "Chlorthalidone") OR (Cilazapril[MeSH] OR "Cilazapril") OR (clentiazem[Supplementary Concept] OR "clentiazem") OR (Clonidine[MeSH] OR "Clonidine") OR ("clonidine, chlorthalidone drug combination"[Supplementary Concept] OR "clonidine, chlorthalidone drug combination") OR ("clopamide, pindolol drug combination"[Supplementary Concept] OR "clopamide, pindolol drug combination") OR (Cromakalim[MeSH] OR "Cromakalim") OR (cycletanide[Supplementary Concept] OR "cycletanide") OR ("cyclo(Trp-Asp-Pro-Val-Leu)"[Supplementary Concept] OR "cyclo(Trp-Asp-Pro-Val-Leu)") OR (Cyclopenthiiazide[MeSH] OR "Cyclopenthiiazide") OR (cyclothiazide[Supplementary Concept] OR "cyclothiazide") OR (dauricine[Supplementary Concept] OR "dauricine") OR (Debrisoquin[MeSH] OR "Debrisoquin") OR (diallyl disulfide[Supplementary Concept] OR "diallyl disulfide") OR (Diazoxide[MeSH] OR "Diazoxide") OR (Dihydralazine[MeSH] OR "Dihydralazine") OR (Dihydroalprenolol[MeSH] OR "Dihydroalprenolol") OR (Diltiazem[MeSH] OR "Diltiazem") OR (dimeditiapramine[Supplementary Concept] OR "dimeditiapramine") OR (dorzolamide[Supplementary Concept] OR "dorzolamide") OR (Doxazosin[MeSH] OR "Doxazosin") OR (efonidipine[Supplementary Concept] OR "efonidipine") OR (Enalapril[MeSH] OR "Enalapril") OR (Enalaprilat[MeSH] OR "Enalaprilat") OR (epanolol[Supplementary Concept] OR "epanolol") OR (Epoprostenol[MeSH] OR "Epoprostenol") OR (eprosartan[Supplementary Concept] OR "eprosartan") OR (essential 303 forte[Supplementary Concept] OR "essential 303 forte") OR (etozolin[Supplementary Concept] OR "etozolin") OR (EXP3174[Supplementary Concept] OR "EXP3174") OR (Felodipine[MeSH] OR "Felodipine") OR (Fenoldopam[MeSH] OR "Fenoldopam") OR (ferulic acid[Supplementary Concept] OR "ferulic acid") OR (FK 409[Supplementary Concept] OR "FK 409") OR (flesinoxan[Supplementary Concept] OR "flesinoxan") OR (Fosinopril[MeSH] OR "Fosinopril") OR (fosinoprilic acid[Supplementary

Concept] OR “fosinoprilic acid”) OR (grayanotoxin I[Supplementary Concept] OR “grayanotoxin I”) OR (Guanabenz[MeSH] OR “Guanabenz”) OR (guanadrel[Supplementary Concept] OR “guanadrel”) OR (Guanethidine[MeSH] OR “Guanethidine”) OR (Guanfacine[MeSH] OR “Guanfacine”) OR (Hexamethonium[MeSH] OR “Hexamethonium”) OR (Hexamethonium Compounds[MeSH] OR “Hexamethonium Compounds” OR “Hexamethonium Compound”) OR (Hydralazine[MeSH] OR “Hydralazine”) OR (Hydrochlorothiazide[MeSH] OR “Hydrochlorothiazide”) OR (“hydrochlorothiazide, lisinopril drug combination”[Supplementary Concept] OR “hydrochlorothiazide, lisinopril drug combination”) OR (hydrochlorothiazide-triamterene[Supplementary Concept] OR “hydrochlorothiazide-triamterene”) OR (Hydroflumethiazide[MeSH] OR “Hydroflumethiazide”) OR (imidapril[Supplementary Concept] OR “imidapril”) OR (Indapamide[MeSH] OR “Indapamide”) OR (“indapamide, perindopril drug combination”[Supplementary Concept] OR “indapamide, perindopril drug combination”) OR (indenolol[Supplementary Concept] OR “indenolol”) OR (Indoramin[MeSH] OR “Indoramin”) OR (indorenate[Supplementary Concept] OR “indorenate”) OR (“inositol nicotinate, mefruside, reserpine drug combination”[Supplementary Concept] OR “inositol nicotinate, mefruside, reserpine drug combination”) OR (irbesartan[Supplementary Concept] OR “irbesartan”) OR (isopropyl unoprostone[Supplementary Concept] OR “isopropyl unoprostone”) OR (Isradipine[MeSH] OR “Isradipine”) OR (K 351[Supplementary Concept] OR “K 351”) OR (Kallidin[MeSH] OR “Kallidin”) OR (Ketanserin[MeSH] OR “Ketanserin”) OR (L 158809[Supplementary Concept] OR “L 158809”) OR (Labetalol[MeSH] OR “Labetalol”) OR (lacidipine[Supplementary Concept] OR “lacidipine”) OR (latanoprost[Supplementary Concept] OR “latanoprost”) OR (lercanidipine[Supplementary Concept] OR “lercanidipine”) OR (Lisinopril[MeSH] OR “Lisinopril”) OR (Ilofexidine[Supplementary Concept] OR “Ilofexidine”) OR (Losartan[MeSH] OR “Losartan”) OR (manidipine[Supplementary Concept] OR “manidipine”) OR (Mecamylamine[MeSH] OR “Mecamylamine”) OR (medroxalol[Supplementary Concept] OR “medroxalol”) OR (medullipin I[Supplementary Concept] OR “medullipin I”) OR (Methyldopa[MeSH] OR “Methyldopa”) OR (Metipranolol[MeSH] OR “Metipranolol”) OR (Metolazone[MeSH] OR “Metolazone”) OR (Mibefradil[MeSH] OR “Mibefradil”) OR (Minoxidil[MeSH] OR “Minoxidil”) OR (monatepil[Supplementary Concept] OR “monatepil”) OR (moxonidine[Supplementary Concept] OR “moxonidine”) OR (Muzolimine[MeSH] OR “Muzolimine”) OR (“N(1),N(11)-diethylnorspermine”[Supplementary Concept] OR “N(1),N(11)-diethylnorspermine”) OR (“N(1),N(14)-bis(ethyl)homospermine”[Supplementary Concept] OR “N(1),N(14)-bis(ethyl)homospermine”) OR (“N,N-di-n-propyldopamine”[Supplementary Concept] OR “N,N-di-n-propyldopamine”) OR (“N-cyano-N'-(2-nitroxyethyl)-3-pyridinecarboximidamide methanesulfonate”[Supplementary Concept] OR “N-cyano-N'-(2-nitroxyethyl)-3-pyridinecarboximidamide methanesulfonate”) OR (Nadolol[MeSH] OR “Nadolol”) OR (naftopidil[Supplementary Concept] OR “naftopidil”) OR (Nicardipine[MeSH] OR “Nicardipine”) OR (Nicorandil[MeSH] OR “Nicorandil”) OR (niguldipine[Supplementary Concept] OR “niguldipine”) OR (nilvadipine[Supplementary Concept] OR “nilvadipine”) OR (Nimodipine[MeSH] OR “Nimodipine”) OR (NIP 121[Supplementary Concept] OR “NIP 121”) OR (Nisoldipine[MeSH] OR “Nisoldipine”) OR (Nitrendipine[MeSH] OR “Nitrendipine”) OR (Nitroprusside[MeSH] OR “Nitroprusside”) OR (oleuropein[Supplementary Concept] OR “oleuropein”) OR (olmesartan medoxomil[Supplementary Concept] OR “olmesartan medoxomil”) OR (omapatrilat[Supplementary Concept] OR “omapatrilat”) OR (Oxprenolol[MeSH] OR “Oxprenolol”) OR (“parathyroid hormone-related protein (1-34)”[Supplementary Concept] OR “parathyroid hormone-related protein (1-34)”) OR (Pargyline[MeSH] OR “Pargyline”) OR (Pempidine[MeSH] OR “Pempidine”) OR (Penbutolol[MeSH] OR “Penbutolol”) OR (Pentolinium Tartrate[MeSH] OR “Pentolinium Tartrate”) OR (Perindopril[MeSH] OR “Perindopril”) OR (Phenoxybenzamine[MeSH] OR “Phenoxybenzamine”) OR (Phentolamine[MeSH] OR “Phentolamine”) OR (Pinacidil[MeSH] OR “Pinacidil”) OR (Pindolol[MeSH] OR “Pindolol”) OR (Piperoxan[MeSH] OR “Piperoxan”) OR (Polythiazide[MeSH] OR “Polythiazide”) OR (Prazosin[MeSH] OR “Prazosin”) OR (Propranolol[MeSH] OR “Propranolol”) OR (Protoveratrines[MeSH] OR “Protoveratrines” OR “Protoveratrine”) OR (quinapril[Supplementary Concept] OR “quinapril”) OR (Ramipril[MeSH] OR “Ramipril”) OR (remikiren[Supplementary Concept] OR “remikiren”) OR (rentiapril[Supplementary Concept] OR “rentiapril”) OR (Reserpine[MeSH] OR “Reserpine”) OR (rilmenidine[Supplementary Concept] OR “rilmenidine”) OR (ryodipine[Supplementary Concept] OR “ryodipine”) OR (Saralasin[MeSH] OR “Saralasin”) OR (scoparone[Supplementary Concept] OR “scoparone”) OR (sesamin[Supplementary Concept] OR “sesamin”) OR (talinalolol[Supplementary Concept] OR “talinalolol”) OR (temocapril hydrochloride[Supplementary Concept] OR “temocapril hydrochloride”) OR (Teprotide[MeSH] OR “Teprotide”) OR (terlipressin[Supplementary Concept] OR “terlipressin”) OR

|    |                                                                                                                                                                                                                                                                                                                                                                                                                                                                                                                                                                                                                                                                                                                                                                                                                                                                                                                                                                                                                                                                                                                                                                                                                                                                        |
|----|------------------------------------------------------------------------------------------------------------------------------------------------------------------------------------------------------------------------------------------------------------------------------------------------------------------------------------------------------------------------------------------------------------------------------------------------------------------------------------------------------------------------------------------------------------------------------------------------------------------------------------------------------------------------------------------------------------------------------------------------------------------------------------------------------------------------------------------------------------------------------------------------------------------------------------------------------------------------------------------------------------------------------------------------------------------------------------------------------------------------------------------------------------------------------------------------------------------------------------------------------------------------|
|    | (tetrahydropalmatine[Supplementary Concept] OR "tetrahydropalmatine") OR (tibolone[Supplementary Concept] OR "tibolone") OR (Ticrynafen[MeSH] OR "Ticrynafen") OR (Timolol[MeSH] OR "Timolol") OR (tobanum[Supplementary Concept] OR "tobanum") OR (tocopherylquinone[Supplementary Concept] OR "tocopherylquinone") OR (Todralazine[MeSH] OR "Todralazine") OR (Tolazoline[MeSH] OR "Tolazoline") OR (torse mide[Supplementary Concept] OR "torse mide") OR (trandolapril[Supplementary Concept] OR "trandolapril") OR (travoprost[Supplementary Concept] OR "travoprost") OR (treprostinil[Supplementary Concept] OR "treprostinil") OR (Trichlormethiazide[MeSH] OR "Trichlormethiazide") OR (trimazosin[Supplementary Concept] OR "trimazosin") OR (Trimethaphan[MeSH] OR "Trimethaphan") OR (urapidil[Supplementary Concept] OR "urapidil") OR (valsartan[Supplementary Concept] OR "valsartan") OR (Veratrum Alkaloids[MeSH] OR "Veratrum Alkaloids" OR "Veratrum Alkaloid") OR (Vincamine[MeSH] OR "Vincamine") OR (viprostol[Supplementary Concept] OR "viprostol") OR (Xipamide[MeSH] OR "Xipamide") OR (Y 26763[Supplementary Concept] OR "Y 26763") OR (Y 27632[Supplementary Concept] OR "Y 27632") OR (zofenopril[Supplementary Concept] OR "zofenopril") |
| 10 | 1 OR 2 OR 3 OR 4 OR 5 OR 6 OR 7 OR 8 OR 9                                                                                                                                                                                                                                                                                                                                                                                                                                                                                                                                                                                                                                                                                                                                                                                                                                                                                                                                                                                                                                                                                                                                                                                                                              |
| 11 | Sleep Apnea Syndromes[MeSH] OR (Sleep[MeSH] AND Apnea[MeSH])                                                                                                                                                                                                                                                                                                                                                                                                                                                                                                                                                                                                                                                                                                                                                                                                                                                                                                                                                                                                                                                                                                                                                                                                           |
| 12 | "Sleep Apnea Syndrome" OR "Sleep Apnea Syndromes" OR "Sleep Apneas" OR "Sleep Hypopnea" OR "Sleep Hypopneas" OR "Sleep-Disordered Breathing" OR "Sleep Disordered Breathing" OR "Mixed Central and Obstructive Sleep Apnea" OR "Mixed Sleep Apnea" OR "Mixed Sleep Apneas" (("mixed" OR "central" OR "obstructive") AND "sleep") OR "Hypersomnia with Periodic Respiration" OR "sleep-related breathing disorder" OR "sleep-related breathing disorders"                                                                                                                                                                                                                                                                                                                                                                                                                                                                                                                                                                                                                                                                                                                                                                                                               |
| 13 | "sa" OR "osa" OR "osas" OR "ahi" OR "sas" OR "sahs" OR "srbd"                                                                                                                                                                                                                                                                                                                                                                                                                                                                                                                                                                                                                                                                                                                                                                                                                                                                                                                                                                                                                                                                                                                                                                                                          |
| 14 | "sleep" OR "hypersomnia"                                                                                                                                                                                                                                                                                                                                                                                                                                                                                                                                                                                                                                                                                                                                                                                                                                                                                                                                                                                                                                                                                                                                                                                                                                               |
| 15 | 13 OR 14                                                                                                                                                                                                                                                                                                                                                                                                                                                                                                                                                                                                                                                                                                                                                                                                                                                                                                                                                                                                                                                                                                                                                                                                                                                               |
| 16 | ("apnea" OR "apneas") OR ("apnaea" OR "apnaeas") OR ("apnoe" OR "apnoes") OR ("apnoea" OR "apnoeas")                                                                                                                                                                                                                                                                                                                                                                                                                                                                                                                                                                                                                                                                                                                                                                                                                                                                                                                                                                                                                                                                                                                                                                   |
| 17 | ("hypopnea" OR "hypopneas") OR ("hypopnaea" OR "hypopnaeas") OR ("hypopnoe" OR "hypopnoes") OR ("hypopnoea" OR "hypopnoeas")                                                                                                                                                                                                                                                                                                                                                                                                                                                                                                                                                                                                                                                                                                                                                                                                                                                                                                                                                                                                                                                                                                                                           |
| 18 | ("apnea-hypopnea" OR "apnea/hypopnea") OR ("apnaea-hypopnaea" OR "apnaea/hypopnaea") OR ("apnoe-hypopnoe" OR "apnoe/hypopnoe") OR ("apnoea-hypopnoea" OR "apnoea/hypopnoea")                                                                                                                                                                                                                                                                                                                                                                                                                                                                                                                                                                                                                                                                                                                                                                                                                                                                                                                                                                                                                                                                                           |
| 19 | "index" OR "syndrome"                                                                                                                                                                                                                                                                                                                                                                                                                                                                                                                                                                                                                                                                                                                                                                                                                                                                                                                                                                                                                                                                                                                                                                                                                                                  |
| 20 | 18 AND 19                                                                                                                                                                                                                                                                                                                                                                                                                                                                                                                                                                                                                                                                                                                                                                                                                                                                                                                                                                                                                                                                                                                                                                                                                                                              |
| 21 | "hypoxia" OR "hypoxemia" OR "hypoxaemia" OR "repetitive hypoxemia" OR "repetitive hypoxaemia" OR "periodic respiration"                                                                                                                                                                                                                                                                                                                                                                                                                                                                                                                                                                                                                                                                                                                                                                                                                                                                                                                                                                                                                                                                                                                                                |
| 22 | 16 OR 17 OR 20 OR 21                                                                                                                                                                                                                                                                                                                                                                                                                                                                                                                                                                                                                                                                                                                                                                                                                                                                                                                                                                                                                                                                                                                                                                                                                                                   |
| 23 | 15 AND 22                                                                                                                                                                                                                                                                                                                                                                                                                                                                                                                                                                                                                                                                                                                                                                                                                                                                                                                                                                                                                                                                                                                                                                                                                                                              |
| 24 | 1 OR 2 OR 13                                                                                                                                                                                                                                                                                                                                                                                                                                                                                                                                                                                                                                                                                                                                                                                                                                                                                                                                                                                                                                                                                                                                                                                                                                                           |
| 25 | 10 AND 24                                                                                                                                                                                                                                                                                                                                                                                                                                                                                                                                                                                                                                                                                                                                                                                                                                                                                                                                                                                                                                                                                                                                                                                                                                                              |
| 26 | risk*[Title/Abstract] OR risk*[MeSH:noexp] OR risk*[MeSH:noexp] OR cohort studies[MeSH Terms] OR group*[Text Word]                                                                                                                                                                                                                                                                                                                                                                                                                                                                                                                                                                                                                                                                                                                                                                                                                                                                                                                                                                                                                                                                                                                                                     |
| 27 | (relative[Title/Abstract] AND risk*[Title/Abstract]) OR (relative risk[Text Word]) OR risks[Text Word] OR cohort studies[MeSH:noexp] OR (cohort[Title/Abstract] AND stud*[Title/Abstract])                                                                                                                                                                                                                                                                                                                                                                                                                                                                                                                                                                                                                                                                                                                                                                                                                                                                                                                                                                                                                                                                             |
| 28 | risk[Title/Abstract] OR risk[MeSH:noexp] OR mortality[Title/Abstract] OR mortality[MeSH:noexp] OR cohort[Title/Abstract]                                                                                                                                                                                                                                                                                                                                                                                                                                                                                                                                                                                                                                                                                                                                                                                                                                                                                                                                                                                                                                                                                                                                               |
| 29 | 26 OR 27 OR 28                                                                                                                                                                                                                                                                                                                                                                                                                                                                                                                                                                                                                                                                                                                                                                                                                                                                                                                                                                                                                                                                                                                                                                                                                                                         |
| 30 | Hypertension/therapy OR Hypertension/diet therapy OR Hypertension/drug therapy OR therapeutic use[sh]                                                                                                                                                                                                                                                                                                                                                                                                                                                                                                                                                                                                                                                                                                                                                                                                                                                                                                                                                                                                                                                                                                                                                                  |
| 31 | 25 AND 30                                                                                                                                                                                                                                                                                                                                                                                                                                                                                                                                                                                                                                                                                                                                                                                                                                                                                                                                                                                                                                                                                                                                                                                                                                                              |
| 32 | 25 AND 29                                                                                                                                                                                                                                                                                                                                                                                                                                                                                                                                                                                                                                                                                                                                                                                                                                                                                                                                                                                                                                                                                                                                                                                                                                                              |
| 33 | 31 OR 32                                                                                                                                                                                                                                                                                                                                                                                                                                                                                                                                                                                                                                                                                                                                                                                                                                                                                                                                                                                                                                                                                                                                                                                                                                                               |

## PubMed search strategy 2 (2013, 2014)

| # | Search strategy                                                                                                                                                                                                                                                                                                                                                                                                                                                                                                                                                                                                                                                                                                                                                                                                                                                                                                                                                                                                                                                                                                                                                                                                                                                                                                                                                                                                                                                                                                                                                                                                                                                                                                                                                                                                                                                                                                                                                                                                                                                                                                                                                                                                                                                                             |
|---|---------------------------------------------------------------------------------------------------------------------------------------------------------------------------------------------------------------------------------------------------------------------------------------------------------------------------------------------------------------------------------------------------------------------------------------------------------------------------------------------------------------------------------------------------------------------------------------------------------------------------------------------------------------------------------------------------------------------------------------------------------------------------------------------------------------------------------------------------------------------------------------------------------------------------------------------------------------------------------------------------------------------------------------------------------------------------------------------------------------------------------------------------------------------------------------------------------------------------------------------------------------------------------------------------------------------------------------------------------------------------------------------------------------------------------------------------------------------------------------------------------------------------------------------------------------------------------------------------------------------------------------------------------------------------------------------------------------------------------------------------------------------------------------------------------------------------------------------------------------------------------------------------------------------------------------------------------------------------------------------------------------------------------------------------------------------------------------------------------------------------------------------------------------------------------------------------------------------------------------------------------------------------------------------|
| 1 | Hypertension[MeSH] OR Prehypertension[MeSH] OR "hypertension" OR ("prehypertension" OR "pre hypertension" OR "pre-hypertension" OR "prehypertensive" OR "pre hypertensive") OR ("blood pressure" AND "high") OR ("blood pressure" AND "elevated") OR ("blood pressure" AND ("increased" OR "increase")) OR ("bp" AND "high") OR ("bp" AND "elevated") OR ("bp" AND ("increased" OR "increase")) OR ("high blood pressure" OR "elevated blood pressure" OR "increased blood pressure" OR "increase in blood pressure") OR ("antihypertensive" OR "anti-hypertensive" OR "anti hypertensive" OR "hypertensive") OR "ht" OR "htn"                                                                                                                                                                                                                                                                                                                                                                                                                                                                                                                                                                                                                                                                                                                                                                                                                                                                                                                                                                                                                                                                                                                                                                                                                                                                                                                                                                                                                                                                                                                                                                                                                                                              |
| 2 | Diuretics[MeSH] OR Diuretics[Pharmacological Action] OR ("diuretic" OR "diuretics") OR ("Diuretic Effect" OR "Diuretic Effects") OR ("1,3-dipropyl-8- 3 noradamantyl xanthine"[Supplementary Concept] OR "1,3-dipropyl-8- 3-noradamantyl xanthine") OR ("2-aminomethyl-4-t-butyl-6-iodophenol"[Supplementary Concept] OR "2-aminomethyl-4-t-butyl-6-iodophenol") OR (Acetazolamide[MeSH] OR "Acetazolamide") OR (Amiloride[MeSH] OR "Amiloride") OR (amiloride, hydrochlorothiazide drug combination[Supplementary Concept] OR "amiloride, hydrochlorothiazide drug combination") OR "atrial natriuretic factor prohormone 1-98" OR "atrial natriuretic factor prohormone 103-126" OR (Bendroflumethiazide[MeSH] OR "Bendroflumethiazide") OR (Bumetanide[MeSH] OR "Bumetanide") OR (Chlorothiazide[MeSH] OR "Chlorothiazide") OR (Chlorthalidone[MeSH] OR "Chlorthalidone") OR (Clopamide[MeSH] OR "Clopamide") OR (Cyclopenthiiazide[MeSH] OR "Cyclopenthiiazide") OR (cyclothiazide[Supplementary Concept] OR "cyclothiazide") OR (E 2078[Supplementary Concept] OR "E 2078") OR (efonidipine[Supplementary Concept] OR "efonidipine") OR (Ethacrynic Acid[MeSH] OR "Ethacrynic Acid") OR (ethanolamine O-sulfate[Supplementary Concept] OR "ethanolamine O-sulfate") OR (Ethoxzolamide[MeSH] OR "Ethoxzolamide") OR (etozolin[Supplementary Concept] OR "etozolin")                                                                                                                                                                                                                                                                                                                                                                                                                                                                                                                                                                                                                                                                                                                                                                                                                                                                                                                     |
| 3 | (fenquizone[Supplementary Concept] OR "fenquizone") OR (Furosemide[MeSH] OR "Furosemide") OR (Hydrochlorothiazide[MeSH] OR "Hydrochlorothiazide") OR (Hydroflumethiazide[MeSH] OR "Hydroflumethiazide") OR (ibopamine[Supplementary Concept] OR "ibopamine") OR (indanone[Supplementary Concept] OR "indanone") OR (Indapamide[MeSH] OR "Indapamide") OR (Isosorbide[MeSH] OR "Isosorbide") OR (Mannitol[MeSH] OR "Mannitol") OR (Mefruside[MeSH] OR "Mefruside") OR (Methazolamide[MeSH] OR "Methazolamide") OR (Methyclothiazide[MeSH] OR "Methyclothiazide") OR (Metolazone[MeSH] OR "Metolazone") OR (MK 473[Supplementary Concept] OR "MK 473") OR (Muzolimine[MeSH] OR "Muzolimine") OR (ozolinone[Supplementary Concept] OR "ozolinone") OR (piretanide[Supplementary Concept] OR "piretanide") OR (Polythiazide[MeSH] OR "Polythiazide") OR (Potassium Citrate[MeSH] OR "Potassium Citrate") OR (spiradoline[Supplementary Concept] OR "spiradoline") OR (Spironolactone[MeSH] OR "Spironolactone") OR (Ticrynafen[MeSH] OR "Ticrynafen") OR (tifluadom[Supplementary Concept] OR "tifluadom") OR (torsemide[Supplementary Concept] OR "torsemide") OR (traxanox[Supplementary Concept] OR "traxanox") OR (Triamterene[MeSH] OR "Triamterene") OR (Trichlormethiazide[MeSH] OR "Trichlormethiazide") OR (U 37883A[Supplementary Concept] OR "U 37883A") OR (U 69593[Supplementary Concept] OR "U 69593") OR (Xipamide[MeSH] OR "Xipamide") OR (anaritide[Supplementary Concept] OR "anaritide") OR (azosemide[Supplementary Concept] OR "azosemide") OR (Canrenoate Potassium [MeSH Term] OR "Canrenoate Potassium") OR (Canrenone [MeSH Term] OR "Canrenone") OR (captopril, hydrochlorothiazide drug combination[Supplementary Concept] OR "captopril, hydrochlorothiazide drug combination") OR (cicletanine[Supplementary Concept] OR "cicletanine") OR (drospironone[Supplementary Concept] OR "drospironone") OR (eplerenone[Supplementary Concept] OR "eplerenone") OR (ethylisopropylamiloride[Supplementary Concept] OR "ethylisopropylamiloride") OR (quinethazone[Supplementary Concept] OR "quinethazone") OR (RU 28318[Supplementary Concept] OR "RU 28318") OR (tripamide[Supplementary Concept] OR "tripamide") OR (Ularitide[Supplementary Concept] OR "Ularitide") |
| 4 | 2 OR 3                                                                                                                                                                                                                                                                                                                                                                                                                                                                                                                                                                                                                                                                                                                                                                                                                                                                                                                                                                                                                                                                                                                                                                                                                                                                                                                                                                                                                                                                                                                                                                                                                                                                                                                                                                                                                                                                                                                                                                                                                                                                                                                                                                                                                                                                                      |
| 5 | Adrenergic alpha-Antagonists[MeSH] OR Adrenergic alpha-Antagonists[Pharmacological Action] OR ("Adrenergic alpha-Antagonists" OR "Adrenergic alpha-Antagonist") OR ("Adrenergic alpha Antagonists" OR "Adrenergic alpha Antagonist") OR ("Adrenergic alpha-Receptor Blockaders" OR "Adrenergic alpha-Receptor Blockader") OR ("Adrenergic alpha Receptor Blockaders" OR "Adrenergic alpha Receptor                                                                                                                                                                                                                                                                                                                                                                                                                                                                                                                                                                                                                                                                                                                                                                                                                                                                                                                                                                                                                                                                                                                                                                                                                                                                                                                                                                                                                                                                                                                                                                                                                                                                                                                                                                                                                                                                                          |

|   |                                                                                                                                                                                                                                                                                                                                                                                                                                                                                                                                                                                                                                                                                                                                                                                                                                                                                                                                                                                                                                                                                                                                                                                                                                                                                                                                                                                                                                                                                                                                                                                                                                                                                                                                                                                                                                                                                                                                                                                                                                                                                                                                                                                                                                                                                                                                                                                                                   |
|---|-------------------------------------------------------------------------------------------------------------------------------------------------------------------------------------------------------------------------------------------------------------------------------------------------------------------------------------------------------------------------------------------------------------------------------------------------------------------------------------------------------------------------------------------------------------------------------------------------------------------------------------------------------------------------------------------------------------------------------------------------------------------------------------------------------------------------------------------------------------------------------------------------------------------------------------------------------------------------------------------------------------------------------------------------------------------------------------------------------------------------------------------------------------------------------------------------------------------------------------------------------------------------------------------------------------------------------------------------------------------------------------------------------------------------------------------------------------------------------------------------------------------------------------------------------------------------------------------------------------------------------------------------------------------------------------------------------------------------------------------------------------------------------------------------------------------------------------------------------------------------------------------------------------------------------------------------------------------------------------------------------------------------------------------------------------------------------------------------------------------------------------------------------------------------------------------------------------------------------------------------------------------------------------------------------------------------------------------------------------------------------------------------------------------|
|   | <p>Blockader") OR ("alpha-Adrenergic Blocking Agents" OR "alpha-Adrenergic Blocking Agent") OR ("alpha Adrenergic Blocking Agents" OR "alpha Adrenergic Blocking Agent") OR ("alpha-Adrenergic Blockers" OR "alpha-Adrenergic Blocker") OR ("alpha Adrenergic Blockers" OR "alpha Adrenergic Blocker") OR ("alpha-Adrenergic Receptor Blockaders" OR "alpha-Adrenergic Receptor Blockader") OR ("alpha Adrenergic Receptor Blockaders" OR "alpha Adrenergic Receptor Blockader") OR ("Adrenergic alpha-Blockers" OR "Adrenergic alpha-Blocker") OR ("Adrenergic alpha Blockers" OR "Adrenergic alpha Blocker") OR (" 2- 2',6'-dimethoxy phenoxyethylamino methylbenzo-1,4-dioxane"[Supplementary Concept] OR " 2- 2',6'-dimethoxy phenoxyethylamino methylbenzo-1,4-dioxane") OR ("1- 2-pyrimidinyl piperazine"[Supplementary Concept] OR "1- 2-pyrimidinyl piperazine") OR (1-benzylimidazole[Supplementary Concept] OR "1-benzylimidazole") OR ("2- beta- 3-iodo-4-hydroxyphenyl ethylaminomethyl tetralone"[Supplementary Concept] OR "2- beta- 3-iodo-4-hydroxyphenyl ethylaminomethyl tetralone") OR (2-methoxyidazoxan[Supplementary Concept] OR "2-methoxyidazoxan") OR (5-methylurapidil[Supplementary Concept] OR "5-methylurapidil") OR ("7,8-methylenedioxy -14-hydroxyberbane"[Supplementary Concept] OR "7,8- methylenedioxy -14-hydroxyberbane") OR (alfuzosin[Supplementary Concept] OR "alfuzosin") OR (amosulalol[Supplementary Concept] OR "amosulalol") OR (AR-C239[Supplementary Concept] OR "AR-C239") OR (arotinolol[Supplementary Concept] OR "arotinolol") OR (atipamezole[Supplementary Concept] OR "atipamezole")</p>                                                                                                                                                                                                                                                                                                                                                                                                                                                                                                                                                                                                                                                                                                                                                                   |
| 6 | <p>(BE 2254[Supplementary Concept] OR "BE 2254") OR (benalfocin[Supplementary Concept] OR "benalfocin") OR (benextramine[Supplementary Concept] OR "benextramine") OR (benoxathian[Supplementary Concept] OR "benoxathian") OR (BMY 7378[Supplementary Concept] OR "BMY 7378") OR (BRL 44408[Supplementary Concept] OR "BRL 44408") OR (bucindolol[Supplementary Concept] OR "bucindolol") OR (bunazosin[Supplementary Concept] OR "bunazosin") OR (carvedilol[Supplementary Concept] OR "carvedilol") OR (chlorethylclonidine[Supplementary Concept] OR "chlorethylclonidine") OR (dapiprazole[Supplementary Concept] OR "dapiprazole") OR (Dibenzylchlorethamine[MeSH] OR "Dibenzylchlorethamine") OR (Dihydroergotoxine[MeSH] OR "Dihydroergotoxine") OR (Doxazosin[MeSH] OR "Doxazosin") OR (EEDQ[Supplementary Concept] OR "EEDQ") OR (efaroxan[Supplementary Concept] OR "efaroxan") OR (Ergoloid Mesylates[MeSH] OR "Ergoloid Mesylates" OR "Ergoloid Mesylate") OR (Idazoxan[MeSH] OR "Idazoxan") OR (ifenprodil[Supplementary Concept] OR "ifenprodil") OR (Indoramin[MeSH] OR "Indoramin") OR (L 657743[Supplementary Concept] OR "L 657743") OR (Labetalol[MeSH] OR "Labetalol") OR (medroxalol[Supplementary Concept] OR "medroxalol") OR (Mianserin[MeSH] OR "Mianserin") OR (midaglizole[Supplementary Concept] OR "midaglizole") OR (monatepil[Supplementary Concept] OR "monatepil") OR (Moxisylyte[MeSH] OR "Moxisylyte") OR (naftopidil[Supplementary Concept] OR "naftopidil") OR (Nicergoline[MeSH] OR "Nicergoline") OR (Phenoxybenzamine[MeSH] OR "Phenoxybenzamine") OR (Phentolamine[MeSH] OR "Phentolamine") OR (phenylpiperazine[Supplementary Concept] OR "phenylpiperazine") OR (Piperoxan[MeSH] OR "Piperoxan") OR (Prazosin[MeSH] OR "Prazosin") OR (proroxan[Supplementary Concept] OR "proroxan") OR (Quinidine[MeSH] OR "Quinidine") OR ("SK^&amp;F 104078"[Supplementary Concept] OR "SK^&amp;F 104078") OR (tamsulosin[Supplementary Concept] OR "tamsulosin") OR (Terazosin[Supplementary Concept] OR "Terazosin") OR (Tolazoline[MeSH] OR "Tolazoline") OR (trimazosin[Supplementary Concept] OR "trimazosin") OR (urapidil[Supplementary Concept] OR "urapidil") OR (YM 12617[Supplementary Concept] OR "YM 12617") OR (Yohimbine[MeSH] OR "Yohimbine") OR (mirtazapine[Supplementary Concept] OR "mirtazapine") OR (nipradilol[Supplementary Concept] OR "nipradilol")</p> |
| 7 | 5 OR 6                                                                                                                                                                                                                                                                                                                                                                                                                                                                                                                                                                                                                                                                                                                                                                                                                                                                                                                                                                                                                                                                                                                                                                                                                                                                                                                                                                                                                                                                                                                                                                                                                                                                                                                                                                                                                                                                                                                                                                                                                                                                                                                                                                                                                                                                                                                                                                                                            |
| 8 | <p>Calcium Channel Blockers[MeSH] OR Calcium Channel Blockers[Pharmacological Action] OR ("Calcium Channel Blockers" OR "Calcium Channel Blocker") OR ("Exogenous Calcium Blockaders" OR "Exogenous Calcium Blockader") OR ("Calcium Channel Blocking Drugs" OR "Channel Blocking Drug") OR ("Exogenous Calcium Inhibitors" OR "Exogenous Calcium Inhibitor") OR ("Exogenous Calcium Antagonists" OR "Exogenous Calcium Antagonist") OR ("1- 2- 3- 4-methoxyphenyl propoxy -4-methoxyphenylethyl -1H-imidazole"[Supplementary Concept] OR "1- 2- 3- 4-methoxyphenyl propoxy -4-methoxyphenylethyl -1H-imidazole") OR ("8- N,N-diethylamino octyl-3,4,5-trimethoxybenzoate"[Supplementary Concept] OR "8- N,N-diethylamino octyl-3,4,5-trimethoxybenzoate") OR (AE0047[Supplementary Concept] OR "AE0047") OR (Amlodipine[MeSH] OR "Amlodipine") OR (amlodipine, atorvastatin drug combination[Supplementary Concept] OR "amlodipine, atorvastatin drug</p>                                                                                                                                                                                                                                                                                                                                                                                                                                                                                                                                                                                                                                                                                                                                                                                                                                                                                                                                                                                                                                                                                                                                                                                                                                                                                                                                                                                                                                                        |



|    |                                                                                                                                                                                                                                                                                                                                                                                                                                                                                                                                                                                                                                                                                                                                                                                                                                                                                                                                                                                                                                                                                                                                                                                                                                                                                                                                                                                                                                                                                                                                                                                                                                                                                                                                                                                                                                                                                                                                                                                                                                                                                                                                                                                                                                                                                                                                                                                                                                                                                              |
|----|----------------------------------------------------------------------------------------------------------------------------------------------------------------------------------------------------------------------------------------------------------------------------------------------------------------------------------------------------------------------------------------------------------------------------------------------------------------------------------------------------------------------------------------------------------------------------------------------------------------------------------------------------------------------------------------------------------------------------------------------------------------------------------------------------------------------------------------------------------------------------------------------------------------------------------------------------------------------------------------------------------------------------------------------------------------------------------------------------------------------------------------------------------------------------------------------------------------------------------------------------------------------------------------------------------------------------------------------------------------------------------------------------------------------------------------------------------------------------------------------------------------------------------------------------------------------------------------------------------------------------------------------------------------------------------------------------------------------------------------------------------------------------------------------------------------------------------------------------------------------------------------------------------------------------------------------------------------------------------------------------------------------------------------------------------------------------------------------------------------------------------------------------------------------------------------------------------------------------------------------------------------------------------------------------------------------------------------------------------------------------------------------------------------------------------------------------------------------------------------------|
|    | <p>combination”) OR (Amrinone[MeSH] OR “Amrinone”) OR (anandamide[Supplementary Concept] OR “anandamide”) OR (anipamil[Supplementary Concept] OR “anipamil”) OR (azimilide[Supplementary Concept] OR “azimilide”) OR (Bencyclane[MeSH] OR “Bencyclane”) OR (benidipine[Supplementary Concept] OR “benidipine”) OR (Bepridil[MeSH] OR “Bepridil”) OR (berbamine[Supplementary Concept] OR “berbamine”) OR (canadine[Supplementary Concept] OR “canadine”) OR (carboxyamido-triazole[Supplementary Concept] OR “carboxyamido-triazole”) OR (caroverine[Supplementary Concept] OR “caroverine”) OR (CD 349[Supplementary Concept] OR “CD 349”) OR (cilnidipine[Supplementary Concept] OR “cilnidipine”) OR (Cinnarizine[MeSH] OR “Cinnarizine”) OR (clentiazem[Supplementary Concept] OR “clentiazem”) OR (Conotoxins[MeSH] OR “Conotoxins” OR “Conotoxin”) OR (Conus magus toxin[Supplementary Concept] OR “Conus magus toxin”) OR (darodipine[Supplementary Concept] OR “darodipine”) OR (dauricine[Supplementary Concept] OR “dauricine”) OR (devapamil[Supplementary Concept] OR “devapamil”) OR (Diltiazem[MeSH] OR “Diltiazem”) OR (dotarizine[Supplementary Concept] OR “dotarizine”) OR (efonidipine[Supplementary Concept] OR “efonidipine”) OR (emopamil[Supplementary Concept] OR “emopamil”)</p>                                                                                                                                                                                                                                                                                                                                                                                                                                                                                                                                                                                                                                                                                                                                                                                                                                                                                                                                                                                                                                                                                                                                                                                    |
| 9  | <p>(enpiperate[Supplementary Concept] OR “enpiperate”) OR (eperisone[Supplementary Concept] OR “eperisone”) OR (falipamil[Supplementary Concept] OR “falipamil”) OR (fantofarone[Supplementary Concept] OR “fantofarone”) OR (fasudil[Supplementary Concept] OR “fasudil”) OR (Felodipine[MeSH] OR “Felodipine”) OR (fenamic acid[Supplementary Concept] OR “fenamic acid”) OR (Fendiline[MeSH] OR “Fendiline”) OR (Flunarizine[MeSH] OR “Flunarizine”) OR (fosfedil[Supplementary Concept] OR “fosfedil”) OR (FTX, spider toxin[Supplementary Concept] OR “FTX, spider toxin”) OR (gabapentin[Supplementary Concept] OR “gabapentin”) OR (Gallopamil[MeSH] OR “Gallopamil”) OR (IH 764-3[Supplementary Concept] OR “IH 764-3”) OR (Isradipine[MeSH] OR “Isradipine”) OR (KT 362[Supplementary Concept] OR “KT 362”) OR (lacidipine[Supplementary Concept] OR “lacidipine”) OR (lamotrigine[Supplementary Concept] OR “lamotrigine”) OR (lercanidipine[Supplementary Concept] OR “lercanidipine”) OR (Lidoflazine[MeSH] OR “Lidoflazine”) OR (Magnesium Sulfate[MeSH] OR “Magnesium Sulfate”) OR (manidipine[Supplementary Concept] OR “manidipine”) OR (manoalide[Supplementary Concept] OR “manoalide”) OR (mepirodipine[Supplementary Concept] OR “mepirodipine”) OR (Mibefradil[MeSH] OR “Mibefradil”) OR (monatepil[Supplementary Concept] OR “monatepil”) OR (“N- 2-guanidinoethyl -5-isoquinolinesulfonamide”[Supplementary Concept] OR “N- 2-guanidinoethyl -5-isoquinolinesulfonamide”) OR (naftopidil[Supplementary Concept] OR “naftopidil”) OR (Nicardipine[MeSH] OR “Nicardipine”) OR (Nifedipine[MeSH] OR “Nifedipine”) OR (niguldipine[Supplementary Concept] OR “niguldipine”) OR (niludipin[Supplementary Concept] OR “niludipin”) OR (nilvadipine[Supplementary Concept] OR “nilvadipine”) OR (Nimodipine[MeSH] OR “Nimodipine”) OR (Nisoldipine[MeSH] OR “Nisoldipine”) OR (Nitrendipine[MeSH] OR “Nitrendipine”) OR (norverapamil[Supplementary Concept] OR “norverapamil”) OR (ochratoxin A[Supplementary Concept] OR “ochratoxin A”) OR (octylonium[Supplementary Concept] OR “octylonium”) OR (omega-Agatoxin IVA[MeSH] OR “omega-Agatoxin IVA”) OR (omega-Conotoxin GVIA[MeSH] OR “omega-Conotoxin GVIA”) OR (omega-conotoxin-MVIIC[Supplementary Concept] OR “omega-conotoxin-MVIIC”) OR (omega-Conotoxins[MeSH] OR “omega-Conotoxin” OR “omega-Conotoxin”) OR (osthol[Supplementary Concept] OR “osthol”) OR (oxodipine[Supplementary Concept] OR “oxodipine”)</p> |
| 10 | <p>(Perhexiline[MeSH] OR “Perhexiline”) OR (pinaverium[Supplementary Concept] OR “pinaverium”) OR (piperidine[Supplementary Concept] OR “piperidine”) OR (PN 202-791[Supplementary Concept] OR “PN 202-791”) OR (pranidipine[Supplementary Concept] OR “pranidipine”) OR (Prenylamine[MeSH] OR “Prenylamine”) OR (R 56865[Supplementary Concept] OR “R 56865”) OR (risedronic acid[Supplementary Concept] OR “risedronic acid”) OR (ryodipine[Supplementary Concept] OR “ryodipine”) OR (SAN 202791[Supplementary Concept] OR “SAN 202791”) OR (sesamodil[Supplementary Concept] OR “sesamodil”) OR (stepholidine[Supplementary Concept] OR “stepholidine”) OR (terodiline[Supplementary Concept] OR “terodiline”) OR (tetrahydropalmatine[Supplementary Concept] OR “tetrahydropalmatine”) OR (tetrandrine[Supplementary Concept] OR “tetrandrine”) OR (tolfenamic acid[Supplementary Concept] OR “tolfenamic acid”) OR (tranilast[Supplementary Concept] OR “tranilast”) OR (Verapamil[MeSH] OR “Verapamil”) OR (Win 55212-2[Supplementary Concept] OR “Win 55212-2”) OR (ziconotide[Supplementary Concept] OR “ziconotide”) OR (1,4-dihydropyridine[Supplementary Concept] OR “1,4-dihydropyridine”) OR (temiverine[Supplementary Concept] OR “temiverine”) OR (Tiapamil Hydrochloride[MeSH Term] OR “Tiapamil Hydrochloride”)</p>                                                                                                                                                                                                                                                                                                                                                                                                                                                                                                                                                                                                                                                                                                                                                                                                                                                                                                                                                                                                                                                                                                                                                        |
| 11 | 8 OR 9 OR 10                                                                                                                                                                                                                                                                                                                                                                                                                                                                                                                                                                                                                                                                                                                                                                                                                                                                                                                                                                                                                                                                                                                                                                                                                                                                                                                                                                                                                                                                                                                                                                                                                                                                                                                                                                                                                                                                                                                                                                                                                                                                                                                                                                                                                                                                                                                                                                                                                                                                                 |

|    |                                                                                                                                                                                                                                                                                                                                                                                                                                                                                                                                                                                                                                                                                                                                                                                                                                                                                                                                                                                                                                                                                                                                                                                                                                                                                                                                                                                                                                                                                                                                                                                                                                                                                                                                                                                                                                                                                                                                                                                                                                                                                                                                                                                                                           |
|----|---------------------------------------------------------------------------------------------------------------------------------------------------------------------------------------------------------------------------------------------------------------------------------------------------------------------------------------------------------------------------------------------------------------------------------------------------------------------------------------------------------------------------------------------------------------------------------------------------------------------------------------------------------------------------------------------------------------------------------------------------------------------------------------------------------------------------------------------------------------------------------------------------------------------------------------------------------------------------------------------------------------------------------------------------------------------------------------------------------------------------------------------------------------------------------------------------------------------------------------------------------------------------------------------------------------------------------------------------------------------------------------------------------------------------------------------------------------------------------------------------------------------------------------------------------------------------------------------------------------------------------------------------------------------------------------------------------------------------------------------------------------------------------------------------------------------------------------------------------------------------------------------------------------------------------------------------------------------------------------------------------------------------------------------------------------------------------------------------------------------------------------------------------------------------------------------------------------------------|
| 12 | Ganglionic Blockers[MeSH] OR Ganglionic Blockers[Pharmacological Action] OR ("Ganglionic Blockers" OR "Ganglionic Blocker") OR ("Ganglioplegic Agents" OR "Ganglioplegic Agent") OR ("Ganglionic Blockaders" OR "Ganglionic Blockader") OR "Ganglionic Blocking Agents" OR "Ganglionic Blocking Agent" OR (benzohexonium[Supplementary Concept] OR "benzohexonium") OR (Chlorisondamine[MeSH] OR "Chlorisondamine") OR (Hexamethonium[MeSH] OR "Hexamethonium") OR (Hexamethonium Compounds[MeSH] OR "Hexamethonium Compounds" OR "Hexamethonium Compound") OR (Mecamylamine[MeSH] OR "Mecamylamine") OR (Pempidine[MeSH] OR "Pempidine") OR (pentamine[Supplementary Concept] OR "pentamine") OR (Pentolinium Tartrate[MeSH] OR "Pentolinium Tartrate") OR (Trimethaphan[MeSH] OR "Trimethaphan")                                                                                                                                                                                                                                                                                                                                                                                                                                                                                                                                                                                                                                                                                                                                                                                                                                                                                                                                                                                                                                                                                                                                                                                                                                                                                                                                                                                                                        |
| 13 | Vasodilator Agents[MeSH] OR Vasodilator Agents[Pharmacological Action] OR ("Vasodilator Agents" OR "Vasodilator Agent") OR ("Vasodilators" OR "Vasodilator") OR ("Vasorelaxants" OR "Vasorelaxant") OR ("Vasodilator Drugs" OR "Vasodilator Drug") OR ("Vasoactive Antagonists" OR "Vasoactive Antagonist") OR (1-0-octadecyl 2-0-acetyl sn-glycero-3-phosphorylcholine[Supplementary Concept] OR "1-0-octadecyl 2-0-acetyl sn-glycero-3-phosphorylcholine") OR (11,12-epoxy-5,8,14-eicosatrienoic acid[Supplementary Concept] OR "11,12-epoxy-5,8,14-eicosatrienoic acid") OR (11-bromovincamine[Supplementary Concept] OR "11-bromovincamine") OR (14,15-epoxy-5,8,11-eicosatrienoic acid[Supplementary Concept] OR "14,15-epoxy-5,8,11-eicosatrienoic acid") OR (2-phenylaminoadenosine[Supplementary Concept] OR "2-phenylaminoadenosine") OR ("3- cis-2,6 dimethylpiperidino sydnonimine"[Supplementary Concept] OR "3- cis-2,6 dimethylpiperidino sydnonimine") OR (6-ketoprostaglandin E1[Supplementary Concept] OR "6-ketoprostaglandin E1") OR (8,9-epoxyeicosatrienoic acid[Supplementary Concept] OR "8,9-epoxyeicosatrienoic acid") OR (Acetylcholine[MeSH Term] OR "Acetylcholine") OR (Adenosine[MeSH Term] OR "Adenosine") OR ("Adenosine-5'- N-ethylcarboxamide "[MeSH Term] OR "Adenosine-5'- N-ethylcarboxamide ") OR (Adrenomedullin[MeSH Term] OR "Adrenomedullin") OR (AE0047[Supplementary Concept] OR "AE0047") OR (ajmalicine[Supplementary Concept] OR "ajmalicine") OR (Alprostadiil[MeSH Term] OR "Alprostadiil") OR (Amiodarone[MeSH Term] OR "Amiodarone") OR (Amlodipine[MeSH Term] OR "Amlodipine") OR (Amrinone[MeSH Term] OR "Amrinone") OR (Amyl Nitrite[MeSH Term] OR "Amyl Nitrite") OR (angiotensin I (1-7)[Supplementary Concept] OR "angiotensin I (1-7)") OR (anisodamine[Supplementary Concept] OR "anisodamine") OR (aprikalim[Supplementary Concept] OR "aprikalim") OR (bamethan[Supplementary Concept] OR "bamethan") OR (bamifylline[Supplementary Concept] OR "bamifylline") OR (Bencyclane[MeSH Term] OR "Bencyclane") OR (benidipine[Supplementary Concept] OR "benidipine") OR (Bepredil[MeSH Term] OR "Bepredil") OR (beraprost[Supplementary Concept] OR "beraprost") |
| 14 | (Betahistine[MeSH Term] OR "Betahistine") OR (bimakalim[Supplementary Concept] OR "bimakalim") OR (BMS 180448[Supplementary Concept] OR "BMS 180448") OR (BQ 22-708[Supplementary Concept] OR "BQ 22-708") OR (Bradykinin[MeSH Term] OR "Bradykinin") OR (bucindolol[Supplementary Concept] OR "bucindolol") OR (bufloxedil[Supplementary Concept] OR "bufloxedil") OR "butalamine" OR (cadralazine[Supplementary Concept] OR "cadralazine") OR (Calcitonin Gene-Related Peptide[MeSH Term] OR "Calcitonin Gene-Related Peptide") OR (cardiodilatin[Supplementary Concept] OR "cardiodilatin") OR (carvedilol[Supplementary Concept] OR "carvedilol") OR (Celiprolol[MeSH Term] OR "Celiprolol") OR (cetiedil[Supplementary Concept] OR "cetiedil") OR (Chromonar[MeSH Term] OR "Chromonar") OR (ciclosidomine[Supplementary Concept] OR "ciclosidomine") OR (cilostazol[Supplementary Concept] OR "cilostazol") OR (colforsin[Supplementary Concept] OR "colforsin") OR (convallatoxin[Supplementary Concept] OR "convallatoxin") OR (Cromakalim[MeSH Term] OR "Cromakalim") OR (Cyclandelate[MeSH Term] OR "Cyclandelate") OR (cyclopiazonic acid[Supplementary Concept] OR "cyclopiazonic acid") OR (dazmegrel[Supplementary Concept] OR "dazmegrel") OR (Diazoxide[MeSH Term] OR "Diazoxide") OR (Dihydroergocristine[MeSH Term] OR "Dihydroergocristine") OR (Dihydroergocryptine[MeSH Term] OR "Dihydroergocryptine") OR (Dilazep[MeSH Term] OR "Dilazep") OR (Diltiazem[MeSH Term] OR "Diltiazem") OR (dimephosphon[Supplementary Concept] OR "dimephosphon") OR (Dipyridamole[MeSH Term] OR "Dipyridamole") OR (dopexamine[Supplementary Concept] OR "dopexamine") OR (dotarizine[Supplementary Concept] OR "dotarizine") OR (drotaverin[Supplementary Concept] OR "drotaverin") OR (Dyphylline[MeSH Term] OR "Dyphylline") OR (eburnamonine[Supplementary Concept] OR "eburnamonine") OR (endothelium-dependent hyperpolarization factor[Supplementary Concept] OR "endothelium-dependent hyperpolarization factor") OR (Enoximone[MeSH Term] OR "Enoximone") OR (eperisone[Supplementary Concept] OR "eperisone") OR (Ergoloid Mesylates[MeSH Term] OR                                                          |

|    |                                                                                                                                                                                                                                                                                                                                                                                                                                                                                                                                                                                                                                                                                                                                                                                                                                                                                                                                                                                                                                                                                                                                                                                                                                                                                                                                                                                                                                                                                                                                                                                                                                                                                                                                                                                                                                                                                                                                                                                                                                                                                                                                                                                                                                                                                                                                                                                                                                                                                                                     |
|----|---------------------------------------------------------------------------------------------------------------------------------------------------------------------------------------------------------------------------------------------------------------------------------------------------------------------------------------------------------------------------------------------------------------------------------------------------------------------------------------------------------------------------------------------------------------------------------------------------------------------------------------------------------------------------------------------------------------------------------------------------------------------------------------------------------------------------------------------------------------------------------------------------------------------------------------------------------------------------------------------------------------------------------------------------------------------------------------------------------------------------------------------------------------------------------------------------------------------------------------------------------------------------------------------------------------------------------------------------------------------------------------------------------------------------------------------------------------------------------------------------------------------------------------------------------------------------------------------------------------------------------------------------------------------------------------------------------------------------------------------------------------------------------------------------------------------------------------------------------------------------------------------------------------------------------------------------------------------------------------------------------------------------------------------------------------------------------------------------------------------------------------------------------------------------------------------------------------------------------------------------------------------------------------------------------------------------------------------------------------------------------------------------------------------------------------------------------------------------------------------------------------------|
|    | <p>"Ergoloid Mesylates") OR (Erythritol[MeSH Term] OR "Erythritol") OR (Erythryl Tetranitrate[MeSH Term] OR "Erythryl Tetranitrate") OR (etafenone[Supplementary Concept] OR "etafenone")</p>                                                                                                                                                                                                                                                                                                                                                                                                                                                                                                                                                                                                                                                                                                                                                                                                                                                                                                                                                                                                                                                                                                                                                                                                                                                                                                                                                                                                                                                                                                                                                                                                                                                                                                                                                                                                                                                                                                                                                                                                                                                                                                                                                                                                                                                                                                                       |
| 15 | <p>(fantofarone[Supplementary Concept] OR "fantofarone") OR (fasudil[Supplementary Concept] OR "fasudil") OR (Felodipine[MeSH Term] OR "Felodipine") OR (Fenoldopam[MeSH Term] OR "Fenoldopam") OR (fenozan[Supplementary Concept] OR "fenozan") OR (FK 409[Supplementary Concept] OR "FK 409") OR (flosequinan[Supplementary Concept] OR "flosequinan") OR (Flunarizine[MeSH Term] OR "Flunarizine") OR (glyceryl-1,3-dinitrate[Supplementary Concept] OR "glyceryl-1,3-dinitrate") OR (Hexobendine[MeSH Term] OR "Hexobendine") OR (Hydralazine[MeSH Term] OR "Hydralazine") OR (ibopamine[Supplementary Concept] OR "ibopamine") OR (ibudilast[Supplementary Concept] OR "ibudilast") OR (ifenprodil[Supplementary Concept] OR "ifenprodil") OR (Iloprost[MeSH Term] OR "Iloprost") OR (imolamine[Supplementary Concept] OR "imolamine") OR (indenolol[Supplementary Concept] OR "indenolol") OR (Inositol Niacinate[Supplementary Concept] OR "Inositol Niacinate") OR (isobutyl nitrite[Supplementary Concept] OR "isobutyl nitrite") OR (Isosorbide Dinitrate[MeSH Term] OR "Isosorbide Dinitrate") OR (isosorbide-5-mononitrate[Supplementary Concept] OR "isosorbide-5-mononitrate") OR (Isoxsuprine[MeSH Term] OR "Isoxsuprine") OR (Isradipine[MeSH Term] OR "Isradipine") OR (Kallidin[MeSH Term] OR "Kallidin") OR (Khellin[MeSH Term] OR "Khellin") OR (KT 362[Supplementary Concept] OR "KT 362") OR (Lidoflazine[MeSH Term] OR "Lidoflazine") OR (maxadilan protein, insect[Supplementary Concept] OR "maxadilan protein, insect") OR (MCI 154[Supplementary Concept] OR "MCI 154") OR (Mibefradil[MeSH Term] OR "Mibefradil") OR (Milrinone[MeSH Term] OR "Milrinone") OR (Minoxidil[MeSH Term] OR "Minoxidil") OR (Molsidomine[MeSH Term] OR "Molsidomine") OR (Moxisylyte[MeSH Term] OR "Moxisylyte") OR ("N- 1-methyl-2-phenylethyl adenosine"[Supplementary Concept] OR "N- 1-methyl-2-phenylethyl adenosine") OR (n-butyl nitrite[Supplementary Concept] OR "n-butyl nitrite") OR ("N-cyano-N'- 1,1-dimethylpropyl - N'- 3-pyridinyl guanidine"[Supplementary Concept] OR "N-cyano-N'- 1,1-dimethylpropyl -N'- 3-pyridinyl)guanidine") OR ("N-cyano-N'- 2-nitroxyethyl -3-pyridinecarboximidamide methanesulfonate"[Supplementary Concept] OR "N-cyano-N'- 2-nitroxyethyl -3-pyridinecarboximidamide methanesulfonate") OR (Nafronyl[MeSH Term] OR "Nafronyl") OR (neбиволol[Supplementary Concept] OR "neбиволol") OR (Niacin[MeSH Term] OR "Niacin")</p>                                     |
| 16 | <p>(nicametate[Supplementary Concept] OR "nicametate") OR (Nicardipine[MeSH Term] OR "Nicardipine") OR (Nicergoline[MeSH Term] OR "Nicergoline") OR (nicofuranose[Supplementary Concept] OR "nicofuranose") OR (Nicorandil[MeSH Term] OR "Nicorandil") OR (Nicotiny Alcohol[MeSH Term] OR "Nicotiny Alcohol") OR (Nifedipine[MeSH Term] OR "Nifedipine") OR (Nimodipine[MeSH Term] OR "Nimodipine") OR (NIP 121[Supplementary Concept] OR "NIP 121") OR (Nisoldipine[MeSH Term] OR "Nisoldipine") OR (Nitrendipine[MeSH Term] OR "Nitrendipine") OR (Nitric Oxide[MeSH Term] OR "Nitric Oxide") OR (Nitroglycerin[MeSH Term] OR "Nitroglycerin") OR (Nitroprusside[MeSH Term] OR "Nitroprusside") OR (nociceptin[Supplementary Concept] OR "nociceptin") OR (nocloprost[Supplementary Concept] OR "nocloprost") OR (Nonachlazine[MeSH Term] OR "Nonachlazine") OR (Nylidrin[MeSH Term] OR "Nylidrin") OR (oleuropein[Supplementary Concept] OR "oleuropein") OR (ONO 1206[Supplementary Concept] OR "ONO 1206") OR (Oxprenolol[MeSH Term] OR "Oxprenolol") OR (Oxyfedrine[MeSH Term] OR "Oxyfedrine") OR (pancreatic extract, povidone drug combination[Supplementary Concept] OR "pancreatic extract, povidone drug combination") OR (Papaverine[MeSH Term] OR "Papaverine") OR (Pentaerythritol Tetranitrate[MeSH Term] OR "Pentaerythritol Tetranitrate") OR (Pentoxifylline[MeSH Term] OR "Pentoxifylline") OR (Perhexiline[MeSH Term] OR "Perhexiline") OR (Phenoxybenzamine[MeSH Term] OR "Phenoxybenzamine") OR (pimobendan[Supplementary Concept] OR "pimobendan") OR (Pinacidil[MeSH Term] OR "Pinacidil") OR (Pindolol[MeSH Term] OR "Pindolol") OR (Pituitary Adenylate Cyclase-Activating Polypeptide[MeSH Term] OR "Pituitary Adenylate Cyclase-Activating Polypeptide") OR (Polymethyl Methacrylate[MeSH Term] OR "Polymethyl Methacrylate") OR (Prenylamine[MeSH Term] OR "Prenylamine") OR (prizidilol[Supplementary Concept] OR "prizidilol") OR (Propranolol[MeSH Term] OR "Propranolol") OR (puerarin[Supplementary Concept] OR "puerarin") OR (rutecarpine[Supplementary Concept] OR "rutecarpine") OR (ryodipine[Supplementary Concept] OR "ryodipine") OR (S-Nitroso-N-Acetylpenicillamine[MeSH Term] OR "S-Nitroso-N-Acetylpenicillamine") OR (S-nitrosocysteine[Supplementary Concept] OR "S-nitrosocysteine") OR (S-Nitrosoglutathione[MeSH Term] OR "S-Nitrosoglutathione") OR (S-Nitrosothiols[MeSH Term] OR "S-Nitrosothiols") OR (scoparone[Supplementary Concept] OR "scoparone")</p> |

|    |                                                                                                                                                                                                                                                                                                                                                                                                                                                                                                                                                                                                                                                                                                                                                                                                                                                                                                                                                                                                                                                                                                                                                                                                                                                                                                                                                                                                                                                                                                                                                                                                                                                                                                                                                                                                                                                                                                                                                                                                                                                                                                                                                                                                                                                                                                                                                                                                                                                                                                                                                                                                                                                                                                                                                           |
|----|-----------------------------------------------------------------------------------------------------------------------------------------------------------------------------------------------------------------------------------------------------------------------------------------------------------------------------------------------------------------------------------------------------------------------------------------------------------------------------------------------------------------------------------------------------------------------------------------------------------------------------------------------------------------------------------------------------------------------------------------------------------------------------------------------------------------------------------------------------------------------------------------------------------------------------------------------------------------------------------------------------------------------------------------------------------------------------------------------------------------------------------------------------------------------------------------------------------------------------------------------------------------------------------------------------------------------------------------------------------------------------------------------------------------------------------------------------------------------------------------------------------------------------------------------------------------------------------------------------------------------------------------------------------------------------------------------------------------------------------------------------------------------------------------------------------------------------------------------------------------------------------------------------------------------------------------------------------------------------------------------------------------------------------------------------------------------------------------------------------------------------------------------------------------------------------------------------------------------------------------------------------------------------------------------------------------------------------------------------------------------------------------------------------------------------------------------------------------------------------------------------------------------------------------------------------------------------------------------------------------------------------------------------------------------------------------------------------------------------------------------------------|
| 17 | (siguazodan[Supplementary Concept] OR "siguazodan") OR (sildenafil[Supplementary Concept] OR "sildenafil") OR (simendan[Supplementary Concept] OR "simendan") OR (Sodium Azide[MeSH Term] OR "Sodium Azide") OR (Suloctidil[MeSH Term] OR "Suloctidil") OR (tadalafil[Supplementary Concept] OR "tadalafil") OR (tetramethylpyrazine[Supplementary Concept] OR "tetramethylpyrazine") OR (tezosentan[Supplementary Concept] OR "tezosentan") OR (Theobromine[MeSH Term] OR "Theobromine") OR (Theophylline[MeSH Term] OR "Theophylline") OR (Thiouracil[MeSH Term] OR "Thiouracil") OR (Tolazoline[MeSH Term] OR "Tolazoline") OR (Trapidil[MeSH Term] OR "Trapidil") OR (triacsin C[Supplementary Concept] OR "triacsin C") OR (trimazosin[Supplementary Concept] OR "trimazosin") OR (Trimetazidine[MeSH Term] OR "Trimetazidine") OR (trimethaphan camsylate[Supplementary Concept] OR "trimethaphan camsylate") OR (urapidil[Supplementary Concept] OR "urapidil") OR (vardenafil[Supplementary Concept] OR "vardenafil") OR (Vasoactive Intestinal Peptide[MeSH Term] OR "Vasoactive Intestinal Peptide") OR (Verapamil[MeSH Term] OR "Verapamil") OR (Vincamine[MeSH Term] OR "Vincamine") OR (vinpocetine[Supplementary Concept] OR "vinpocetine") OR (W 7[Supplementary Concept] OR "W 7") OR (Xanthinol Niacinate[MeSH Term] OR "Xanthinol Niacinate") OR ("butalamine"[Supplementary Concept] OR "butalamine") OR (linsidomine[Supplementary Concept] OR "linsidomine") OR (nipradilol[Supplementary Concept] OR "nipradilol") OR (toborinone[Supplementary Concept] OR "toborinone")                                                                                                                                                                                                                                                                                                                                                                                                                                                                                                                                                                                                                                                                                                                                                                                                                                                                                                                                                                                                                                                                                                                                                           |
| 18 | 13 OR 14 OR 15 OR 16 OR 17                                                                                                                                                                                                                                                                                                                                                                                                                                                                                                                                                                                                                                                                                                                                                                                                                                                                                                                                                                                                                                                                                                                                                                                                                                                                                                                                                                                                                                                                                                                                                                                                                                                                                                                                                                                                                                                                                                                                                                                                                                                                                                                                                                                                                                                                                                                                                                                                                                                                                                                                                                                                                                                                                                                                |
| 19 | Adrenergic beta-Antagonists[MeSH] OR ADRENERGIC BETA RECEPTOR BLOCKADERS[MeSH] OR Adrenergic beta-Antagonists [Pharmacological Action] OR ("Adrenergic beta-Antagonists" OR "Adrenergic beta-Antagonist") OR ("Adrenergic beta Antagonists" OR "Adrenergic beta Antagonist") OR ("beta-Adrenergic Receptor Blockaders" OR "beta-Adrenergic Receptor Blockader") OR ("beta Adrenergic Receptor Blockaders" OR "beta Adrenergic Receptor Blockader") OR ("beta-Adrenergic Blockers" OR "beta-Adrenergic Blocker") OR ("Adrenergic beta-Blockers" OR "Adrenergic beta-Blocker") OR ("Adrenergic beta-Receptor Blockaders" OR "Adrenergic beta-Receptor Blockader") OR ("Adrenergic beta Receptor Blockaders" OR "Adrenergic beta Receptor Blockader") OR ("beta-Adrenergic Blocking Agents" OR "beta-Adrenergic Blocking Agent") OR ("beta Adrenergic Blocking Agents" OR "beta Adrenergic Blocking Agent") OR ("beta blockers" OR "beta blocker") OR ("beta-blockers" OR "beta-blocker") OR (1-hexadecyl-2-acetyl-glycero-3-phosphocholine[Supplementary Concept] OR "1-hexadecyl-2-acetyl-glycero-3-phosphocholine") OR ("3- 2-ethylphenoxy -1- 1,2,3,4-tetrahydronaphth-1-ylamino -2-propanol oxalate"[Supplementary Concept] OR "3- 2-ethylphenoxy -1- 1,2,3,4-tetrahydronaphth-1-ylamino -2-propanol oxalate") OR (3-iodopindolol[Supplementary Concept] OR "3-iodopindolol") OR (5 hydroxypropafenone[Supplementary Concept] OR "5-hydroxypropafenone") OR (Acebutolol[MeSH] OR "Acebutolol") OR (Alprenolol[MeSH] OR "Alprenolol") OR (amosulalol[Supplementary Concept] OR "amosulalol") OR (arotinolol[Supplementary Concept] OR "arotinolol") OR (Atenolol[MeSH] OR "Atenolol") OR (befunolol[Supplementary Concept] OR "befunolol") OR (Betaxolol[MeSH] OR "Betaxolol") OR (bevantolol[Supplementary Concept] OR "bevantolol") OR (Bisoprolol[MeSH] OR "Bisoprolol") OR (bopindolol[Supplementary Concept] OR "bopindolol") OR (bromoacetylalprenololmenthane[Supplementary Concept] OR "bromoacetylalprenololmenthane") OR (bucindolol[Supplementary Concept] OR "bucindolol") OR (bufetolol[Supplementary Concept] OR "bufetolol") OR (bufuralol[Supplementary Concept] OR "bufuralol") OR (Bupranolol[MeSH] OR "Bupranolol") OR (butofilolol[Supplementary Concept] OR "butofilolol") OR (Butoxamine[MeSH] OR "Butoxamine") OR (carazolol[Supplementary Concept] OR "carazolol") OR (Carteolol[MeSH] OR "Carteolol") OR (carvedilol[Supplementary Concept] OR "carvedilol") OR (Celiprolol[MeSH] OR "Celiprolol") OR (CGP 12177[Supplementary Concept] OR "CGP 12177") OR (CGP 20712A[Supplementary Concept] OR "CGP 20712A") OR (cyanopindolol[Supplementary Concept] OR "cyanopindolol") OR (Dihydroalprenolol[MeSH] OR "Dihydroalprenolol") |
| 20 | (epanolol[Supplementary Concept] OR "epanolol") OR (esmolol[Supplementary Concept] OR "esmolol") OR (exaprolol[Supplementary Concept] OR "exaprolol") OR (fleistolol[Supplementary Concept] OR "fleistolol") OR (icatibant[Supplementary Concept] OR "icatibant") OR (ICI 118551[Supplementary Concept] OR "ICI 118551") OR (ICI 89406[Supplementary Concept] OR "ICI 89406") OR (indenolol[Supplementary Concept] OR "indenolol ") OR (Iodocyanopindolol[MeSH] OR "Iodocyanopindolol") OR (IPS 339[Supplementary Concept] OR "IPS 339") OR (Labetalol[MeSH] OR "Labetalol") OR (landiolol[Supplementary Concept] OR "landiolol") OR (Levobunolol[MeSH] OR "Levobunolol") OR (medroxalol[Supplementary Concept] OR "medroxalol") OR (mepindolol[Supplementary Concept] OR "mepindolol") OR (Metipranolol[MeSH] OR "Metipranolol") OR                                                                                                                                                                                                                                                                                                                                                                                                                                                                                                                                                                                                                                                                                                                                                                                                                                                                                                                                                                                                                                                                                                                                                                                                                                                                                                                                                                                                                                                                                                                                                                                                                                                                                                                                                                                                                                                                                                                      |

|    |                                                                                                                                                                                                                                                                                                                                                                                                                                                                                                                                                                                                                                                                                                                                                                                                                                                                                                                                                                                                                                                                                                                                                                                                                                                                                                                                                                                                                                                                                                                                                                                                                                                                                                                                                                                                                                                                                                                                                                                                                                                                                                                                                         |
|----|---------------------------------------------------------------------------------------------------------------------------------------------------------------------------------------------------------------------------------------------------------------------------------------------------------------------------------------------------------------------------------------------------------------------------------------------------------------------------------------------------------------------------------------------------------------------------------------------------------------------------------------------------------------------------------------------------------------------------------------------------------------------------------------------------------------------------------------------------------------------------------------------------------------------------------------------------------------------------------------------------------------------------------------------------------------------------------------------------------------------------------------------------------------------------------------------------------------------------------------------------------------------------------------------------------------------------------------------------------------------------------------------------------------------------------------------------------------------------------------------------------------------------------------------------------------------------------------------------------------------------------------------------------------------------------------------------------------------------------------------------------------------------------------------------------------------------------------------------------------------------------------------------------------------------------------------------------------------------------------------------------------------------------------------------------------------------------------------------------------------------------------------------------|
|    | (Metoprolol[MeSH] OR "Metoprolol") OR (metoprolol succinate[Supplementary Concept] OR "metoprolol succinate") OR (Nadolol[MeSH] OR "Nadolol") OR (nebivolol[Supplementary Concept] OR "nebivolol") OR (Oxprenolol[MeSH] OR "Oxprenolol") OR (Penbutolol[MeSH] OR "Penbutolol") OR (Pindolol[MeSH] OR "Pindolol") OR (Practolol[MeSH] OR "Practolol") OR (prizidilol[Supplementary Concept] OR "prizidilol") OR (Propranolol[MeSH] OR "Propranolol") OR (Sotalol[MeSH] OR "Sotalol") OR (talinalolol[Supplementary Concept] OR "talinalolol") OR (tertatolol[Supplementary Concept] OR "tertatolol") OR (tilisolol[Supplementary Concept] OR "tilisolol") OR (Timolol[MeSH] OR "Timolol") OR (tobanum[Supplementary Concept] OR "tobanum") OR (nipradilol[Supplementary Concept] OR "hipradilol")                                                                                                                                                                                                                                                                                                                                                                                                                                                                                                                                                                                                                                                                                                                                                                                                                                                                                                                                                                                                                                                                                                                                                                                                                                                                                                                                                        |
| 21 | 19 OR 20                                                                                                                                                                                                                                                                                                                                                                                                                                                                                                                                                                                                                                                                                                                                                                                                                                                                                                                                                                                                                                                                                                                                                                                                                                                                                                                                                                                                                                                                                                                                                                                                                                                                                                                                                                                                                                                                                                                                                                                                                                                                                                                                                |
| 22 | Angiotensin-Converting Enzyme Inhibitors[MeSH] OR Enzyme Inhibitors[MeSH] OR Enzymes/antagonists and inhibitors[MeSH] OR (Kininase II[MeSH] AND "antagonists and inhibitors" [Subheading]) OR Angiotensin-Converting Enzyme Inhibitors [Pharmacological Action] OR ("Angiotensin-Converting Enzyme Inhibitors" OR "Angiotensin-Converting Enzyme Inhibitor") OR ("Angiotensin Converting Enzyme Inhibitors" OR "Angiotensin Converting Enzyme Inhibitor") OR ("Angiotensin I-Converting Enzyme Inhibitors" OR "Angiotensin I-Converting Enzyme Inhibitor") OR ("Angiotensin I Converting Enzyme Inhibitors" OR "Angiotensin I Converting Enzyme Inhibitor") OR ("ACE Inhibitors" OR "ACE Inhibitor") OR ("Kininase II Antagonists" OR "Kininase II Antagonist") OR ("Kininase II Inhibitors" OR "Kininase II Inhibitor") OR ("Angiotensin-Converting Enzyme Antagonists" OR "Angiotensin-Converting Enzyme Antagonist") OR ("Angiotensin Converting Enzyme Antagonists" OR "Angiotensin Converting Enzyme Antagonist") OR (1-Sarcosine-8-Isoleucine Angiotensin II[MeSH] OR "1-Sarcosine-8-Isoleucine Angiotensin II") OR (alacepril[Supplementary Concept] OR "alacepril") OR (benazepril[Supplementary Concept] OR "benazepril") OR (benazeprilat[Supplementary Concept] OR "benazeprilat") OR (Captopril[MeSH] OR "Captopril") OR (captopril, hydrochlorothiazide drug combination[Supplementary Concept] OR "captopril, hydrochlorothiazide drug combination") OR "ceranapril" OR (cilazaprilat[Supplementary Concept] OR "cilazaprilat") OR (compound 351 A[Supplementary Concept] OR "compound 351 A") OR (delapril[Supplementary Concept] OR "delapril") OR (Enalapril[MeSH] OR "Enalapril") OR (Enalaprilat[MeSH] OR "Enalaprilat") OR (Fosinopril[MeSH] OR "Fosinopril") OR "fosinoprilic acid" OR ("glyceraldehyde 3-phosphate dehydrogenase 304-313 [Supplementary Concept] OR "glyceraldehyde 3-phosphate dehydrogenase 304-313 ") OR (imidapril[Supplementary Concept] OR "imidapril") OR (libenzapril[Supplementary Concept] OR "libenzapril") OR (Lisinopril[MeSH] OR "Lisinopril") OR (moexipril[Supplementary Concept] OR "moexipril") |
| 23 | (omapatrilat[Supplementary Concept] OR "omapatrilat") OR (Perindopril[MeSH] OR "Perindopril") OR (perindoprilat[Supplementary Concept] OR "perindoprilat") OR (quinapril[Supplementary Concept] OR "quinapril") OR (quinaprilat[Supplementary Concept] OR "quinaprilat") OR (Ramipril[MeSH] OR "Ramipril") OR (ramiprilat[Supplementary Concept] OR "ramiprilat") OR (rentiapril[Supplementary Concept] OR "rentiapril") OR (Saralasin[MeSH] OR "Saralasin") OR (spirapril[Supplementary Concept] OR "spirapril") OR (telmisartan[Supplementary Concept] OR "telmisartan") OR (temocapril hydrochloride[Supplementary Concept] OR "temocapril hydrochloride") OR (Teprotide[MeSH] OR "Teprotide") OR (trandolapril[Supplementary Concept] OR "trandolapril") OR (zofenopril[Supplementary Concept] OR "zofenopril") OR (" S -malic acid 1'-O-beta-gentiobioside"[Supplementary Concept] OR " S -malic acid 1'-O-beta-gentiobioside") OR (ceronapril[Supplementary Concept] OR "ceronapril") OR (Cilazapril[MeSH Term] OR "Cilazapril") OR (fosinoprilat[Supplementary Concept] OR "fosinoprilat")                                                                                                                                                                                                                                                                                                                                                                                                                                                                                                                                                                                                                                                                                                                                                                                                                                                                                                                                                                                                                                                       |
| 24 | 23 OR 24                                                                                                                                                                                                                                                                                                                                                                                                                                                                                                                                                                                                                                                                                                                                                                                                                                                                                                                                                                                                                                                                                                                                                                                                                                                                                                                                                                                                                                                                                                                                                                                                                                                                                                                                                                                                                                                                                                                                                                                                                                                                                                                                                |
| 25 | Antihypertensive Agents[MeSH] OR Antihypertensive Agents [Pharmacological Action] OR ("Antihypertensives" OR "Antihypertensive") OR ("Anti-Hypertensives" OR "Anti-Hypertensive") OR ("Anti Hypertensives" OR "Anti Hypertensive") OR ("Antihypertensive Drugs" OR "Antihypertensive Drug") OR ("Anti-Hypertensive Drugs" OR "Anti-Hypertensive Drug") OR ("Anti Hypertensive Drugs" OR "Anti Hypertensive Drug") OR ("Antihypertensive Agents" OR "Antihypertensive Agent") OR ("Anti-Hypertensive Agents" OR "Anti-Hypertensive Agent") OR ("Anti Hypertensive Agents" OR "Anti Hypertensive Agent") OR (1-0-octadecyl 2-0-acetyl sn-glycero-3-phosphorylcholine[Supplementary Concept] OR "1-0-octadecyl 2-0-acetyl sn-glycero-3-phosphorylcholine") OR (1-hexadecyl-2-acetyl-glycero-3-phosphocholine[Supplementary Concept] OR "1-hexadecyl-2-acetyl-glycero-3-phosphocholine") OR (1-Sarcosine-8-Isoleucine Angiotensin II[MeSH] OR "1-Sarcosine-8-Isoleucine Angiotensin II") OR ("2- 4- 2-carboxyethyl)phenethylamino -5'-N-                                                                                                                                                                                                                                                                                                                                                                                                                                                                                                                                                                                                                                                                                                                                                                                                                                                                                                                                                                                                                                                                                                                    |

|    |                                                                                                                                                                                                                                                                                                                                                                                                                                                                                                                                                                                                                                                                                                                                                                                                                                                                                                                                                                                                                                                                                                                                                                                                                                                                                                                                                                                                                                                                                                                                                                                                                                                                                                                                                                                                                                                                                                          |
|----|----------------------------------------------------------------------------------------------------------------------------------------------------------------------------------------------------------------------------------------------------------------------------------------------------------------------------------------------------------------------------------------------------------------------------------------------------------------------------------------------------------------------------------------------------------------------------------------------------------------------------------------------------------------------------------------------------------------------------------------------------------------------------------------------------------------------------------------------------------------------------------------------------------------------------------------------------------------------------------------------------------------------------------------------------------------------------------------------------------------------------------------------------------------------------------------------------------------------------------------------------------------------------------------------------------------------------------------------------------------------------------------------------------------------------------------------------------------------------------------------------------------------------------------------------------------------------------------------------------------------------------------------------------------------------------------------------------------------------------------------------------------------------------------------------------------------------------------------------------------------------------------------------------|
|    | ethylcarboxamidoadenosine"[Supplementary Concept] OR "2- 4- 2-carboxyethyl phenethylamino -5'-N-ethylcarboxamidoadenosine") OR ("3,4-Dichloro-N-methyl-N- 2- 1-pyrrolidinyl –cyclohexyl -benzeneacetamide, trans -Isomer"[MeSH] OR "3,4-Dichloro-N-methyl-N- 2- 1-pyrrolidinyl –cyclohexyl -benzeneacetamide, trans -Isomer") OR (3-nitropropionic acid[Supplementary Concept] OR "3-nitropropionic acid") OR ("5- dimethylamino -N- 3,4-dimethyl-5-isoxazolyl -1-naphthalenesulfonamide"[Supplementary Concept] OR "5- dimethylamino -N- 3,4-dimethyl-5-isoxazolyl -1-naphthalenesulfonamide") OR (Acebutolol[MeSH] OR "Acebutolol") OR (acebutolol, nifedipine drug combination[Supplementary Concept] OR "acebutolol, nifedipine drug combination") OR (Adrenomedullin[MeSH] OR "Adrenomedullin") OR (AE0047[Supplementary Concept] OR "AE0047") OR (alfuzosin[Supplementary Concept] OR "alfuzosin") OR (Alprenolol[MeSH] OR "Alprenolol")                                                                                                                                                                                                                                                                                                                                                                                                                                                                                                                                                                                                                                                                                                                                                                                                                                                                                                                                                           |
| 26 | (Amlodipine[MeSH] OR "Amlodipine") OR (amlodipine, atorvastatin drug combination[Supplementary Concept] OR "amlodipine, atorvastatin drug combination") OR (amlodipine, valsartan drug combination[Supplementary Concept] OR "amlodipine, valsartan drug combination") OR (amosulalol[Supplementary Concept] OR "amosulalol") OR ("angiotensin I 1-7 "[Supplementary Concept] OR "angiotensin I 1-7 ") OR (aprikalim[Supplementary Concept] OR "aprikalim") OR (atenolol, chlortalidone drug combinations[Supplementary Concept] OR "atenolol, chlortalidone drug combinations") OR ("atrial natriuretic factor prohormone 103-126 "[Supplementary Concept] OR "atrial natriuretic factor prohormone 103-126 ") OR (benazepril[Supplementary Concept] OR "benazepril") OR (bendazole[Supplementary Concept] OR "bendazole") OR (Bendroflumethiazide[MeSH] OR "Bendroflumethiazide") OR (benoxathian[Supplementary Concept] OR "benoxathian") OR (Bepriidil[MeSH] OR "Bepriidil") OR (berbamine[Supplementary Concept] OR "berbamine") OR (Betaxolol[MeSH] OR "Betaxolol") OR (Bethanidine[MeSH] OR "Bethanidine") OR (bimakalim[Supplementary Concept] OR "bimakalim") OR (bimatoprost[Supplementary Concept] OR "bimatoprost") OR (bis(p-chlorophenyl)acetic acid[Supplementary Concept] OR "bis(p-chlorophenyl)acetic acid") OR (Bisoprolol[MeSH] OR "Bisoprolol") OR (bisoprolol, hydrochlorothiazide drug combination[Supplementary Concept] OR "bisoprolol, hydrochlorothiazide drug combination") OR (bosentan[Supplementary Concept] OR "bosentan") OR (BQ 22-708[Supplementary Concept] OR "BQ 22-708") OR (BQ 788[Supplementary Concept] OR "BQ 788")                                                                                                                                                                                                                                           |
| 27 | (Bretylum Tosylate[MeSH] OR "Bretylum Tosylate") OR (brimonidine[Supplementary Concept] OR "brimonidine") OR (Bupranolol[MeSH] OR "Bupranolol") OR (cadralazine[Supplementary Concept] OR "cadralazine") OR (candesartan[Supplementary Concept] OR "candesartan") OR (candesartan cilexetil[Supplementary Concept] OR "candesartan cilexetil") OR (candoxatriil[Supplementary Concept] OR "candoxatriil") OR (Captopril[MeSH] OR "Captopril") OR (Carteolol[MeSH] OR "Carteolol") OR (carvedilol[Supplementary Concept] OR "carvedilol") OR (Chlorisondamine[MeSH] OR "Chlorisondamine") OR (Chlorothiazide[MeSH] OR "Chlorothiazide") OR (Chlorthalidone[MeSH] OR "Chlorthalidone") OR (Cilazapril[MeSH] OR "Cilazapril") OR (clentiazem[Supplementary Concept] OR "clentiazem") OR (Clonidine[MeSH] OR "Clonidine") OR (clonidine, chlorthalidone drug combination[Supplementary Concept] OR "clonidine, chlorthalidone drug combination") OR (clopamide, pindolol drug combination[Supplementary Concept] OR "clopamide, pindolol drug combination") OR (Cromakalim[MeSH] OR "Cromakalim") OR ("cyclo Trp-Asp-Pro-Val-Leu "[Supplementary Concept] OR "cyclo Trp-Asp-Pro-Val-Leu ") OR (Cyclopenthiiazide[MeSH] OR "Cyclopenthiiazide") OR (cyclothiazide[Supplementary Concept] OR "cyclothiazide") OR (dauricine[Supplementary Concept] OR "dauricine") OR (Debrisoquin[MeSH] OR "Debrisoquin") OR (diallyl disulfide[Supplementary Concept] OR "diallyl disulfide") OR (Diazoxide[MeSH] OR "Diazoxide") OR (Dihydralazine[MeSH] OR "Dihydralazine") OR (Dihydroalprenolol[MeSH] OR "Dihydroalprenolol") OR (Diltiazem[MeSH] OR "Diltiazem") OR "dimedtiapramine" OR (dorzolamide[Supplementary Concept] OR "dorzolamide") OR (Doxazosin[MeSH] OR "Doxazosin") OR (efonidipine[Supplementary Concept] OR "efonidipine") OR (Enalapril[MeSH] OR "Enalapril") OR (Enalaprilat[MeSH] OR "Enalaprilat") |
| 28 | (epanolol[Supplementary Concept] OR "epanolol") OR (Epoprostenol[MeSH] OR "Epoprostenol") OR (eprosartan[Supplementary Concept] OR "eprosartan") OR (essential 303 forte[Supplementary Concept] OR "essential 303 forte") OR (etozolin[Supplementary Concept] OR "etozolin") OR (EXP3174[Supplementary Concept] OR "EXP3174") OR (Felodipine[MeSH] OR "Felodipine") OR (Fenoldopam[MeSH] OR "Fenoldopam") OR (ferulic acid[Supplementary Concept] OR "ferulic acid") OR (FK 409[Supplementary Concept] OR "FK 409") OR (flesinoxan[Supplementary Concept] OR "flesinoxan") OR (Fosinopril[MeSH] OR "Fosinopril") OR (grayanotoxin I[Supplementary Concept] OR "grayanotoxin I") OR (Guanabenz[MeSH] OR "Guanabenz") OR (guanadrel[Supplementary Concept]                                                                                                                                                                                                                                                                                                                                                                                                                                                                                                                                                                                                                                                                                                                                                                                                                                                                                                                                                                                                                                                                                                                                                 |

|    |                                                                                                                                                                                                                                                                                                                                                                                                                                                                                                                                                                                                                                                                                                                                                                                                                                                                                                                                                                                                                                                                                                                                                                                                                                                                                                                                                                                                                                                                                                                                                                                                                                                                                                                                                                                                                                                                                                                                                                                                                                                                                                                                                                                                                                                                                                                                                                                                                                                                                                                                                                                        |
|----|----------------------------------------------------------------------------------------------------------------------------------------------------------------------------------------------------------------------------------------------------------------------------------------------------------------------------------------------------------------------------------------------------------------------------------------------------------------------------------------------------------------------------------------------------------------------------------------------------------------------------------------------------------------------------------------------------------------------------------------------------------------------------------------------------------------------------------------------------------------------------------------------------------------------------------------------------------------------------------------------------------------------------------------------------------------------------------------------------------------------------------------------------------------------------------------------------------------------------------------------------------------------------------------------------------------------------------------------------------------------------------------------------------------------------------------------------------------------------------------------------------------------------------------------------------------------------------------------------------------------------------------------------------------------------------------------------------------------------------------------------------------------------------------------------------------------------------------------------------------------------------------------------------------------------------------------------------------------------------------------------------------------------------------------------------------------------------------------------------------------------------------------------------------------------------------------------------------------------------------------------------------------------------------------------------------------------------------------------------------------------------------------------------------------------------------------------------------------------------------------------------------------------------------------------------------------------------------|
|    | <p>OR "guanadrel") OR (Guanethidine[MeSH] OR "Guanethidine") OR (Guanfacine[MeSH] OR "Guanfacine") OR (Hexamethonium[MeSH] OR "Hexamethonium") OR (Hexamethonium Compounds[MeSH] OR "Hexamethonium Compounds" OR "Hexamethonium Compound") OR (Hydralazine[MeSH] OR "Hydralazine") OR (Hydrochlorothiazide[MeSH] OR "Hydrochlorothiazide") OR (hydrochlorothiazide, lisinopril drug combination[Supplementary Concept] OR "hydrochlorothiazide, lisinopril drug combination") OR (hydrochlorothiazide-triamterene[Supplementary Concept] OR "hydrochlorothiazide-triamterene") OR (Hydroflumethiazide[MeSH] OR "Hydroflumethiazide") OR (imidapril[Supplementary Concept] OR "imidapril") OR (Indapamide[MeSH] OR "Indapamide") OR (indapamide, perindopril drug combination[Supplementary Concept] OR "indapamide, perindopril drug combination") OR (indenolol[Supplementary Concept] OR "indenolol") OR (Indoramin[MeSH] OR "Indoramin") OR (indorenate[Supplementary Concept] OR "indorenate") OR (inositol nicotinate, mefruside, reserpine drug combination[Supplementary Concept] OR "inositol nicotinate, mefruside, reserpine drug combination") OR (irbesartan[Supplementary Concept] OR "irbesartan") OR (isopropyl unoprostone[Supplementary Concept] OR "isopropyl unoprostone") OR (Isradipine[MeSH] OR "Isradipine") OR (Kallidin[MeSH] OR "Kallidin") OR (Ketanserin[MeSH] OR "Ketanserin") OR (L 158809[Supplementary Concept] OR "L 158809") OR (Labetalol[MeSH] OR "Labetalol") OR (lacidipine[Supplementary Concept] OR "lacidipine") OR (latanoprost[Supplementary Concept] OR "latanoprost") OR (lercanidipine[Supplementary Concept] OR "lercanidipine") OR (Lisinopril[MeSH] OR "Lisinopril") OR (lofexidine[Supplementary Concept] OR "lofexidine") OR (Losartan[MeSH] OR "Losartan")</p>                                                                                                                                                                                                                                                                                                                                                                                                                                                                                                                                                                                                                                                                                                                                                                     |
| 29 | <p>(manidipine[Supplementary Concept] OR "manidipine") OR (Mecamylamine[MeSH] OR "Mecamylamine") OR (medroxalol[Supplementary Concept] OR "medroxalol") OR (medullipin I[Supplementary Concept] OR "medullipin I") OR (Methyldopa[MeSH] OR "Methyldopa") OR (Metipranolol[MeSH] OR "Metipranolol") OR (Metolazone[MeSH] OR "Metolazone") OR (Mibefradil[MeSH] OR "Mibefradil") OR (Minoxidil[MeSH] OR "Minoxidil") OR (monatepil[Supplementary Concept] OR "monatepil") OR (moxonidine[Supplementary Concept] OR "moxonidine") OR (Muzolimine[MeSH] OR "Muzolimine") OR ("N 1 ,N 11 -diethylnorspermine"[Supplementary Concept] OR "N 1 ,N 11 -diethylnorspermine") OR ("N 1 ,N 14 -bis(ethyl)homospermine"[Supplementary Concept] OR "N 1 ,N 14 -bis(ethyl)homospermine") OR (N,N-di-n-propyldopamine[Supplementary Concept] OR "N,N-di-n-propyldopamine") OR ("N-cyano-N'- 2-nitroxyethyl -3-pyridinecarboximidamide methanesulfonate"[Supplementary Concept] OR "N-cyano-N'- 2-nitroxyethyl -3-pyridinecarboximidamide methanesulfonate") OR (Nadolol[MeSH] OR "Nadolol") OR (naftopidil[Supplementary Concept] OR "naftopidil") OR (Nicardipine[MeSH] OR "Nicardipine") OR (Nicorandil[MeSH] OR "Nicorandil") OR (niguldipine[Supplementary Concept] OR "niguldipine") OR (nilvadipine[Supplementary Concept] OR "nilvadipine") OR (Nimodipine[MeSH] OR "Nimodipine") OR (NIP 121[Supplementary Concept] OR "NIP 121") OR (Nisoldipine[MeSH] OR "Nisoldipine") OR (Nitrendipine[MeSH] OR "Nitrendipine") OR (Nitroprusside[MeSH] OR "Nitroprusside") OR (oleuropein[Supplementary Concept] OR "oleuropein") OR (olmesartan medoxomil[Supplementary Concept] OR "olmesartan medoxomil") OR (omapatrilat[Supplementary Concept] OR "omapatrilat") OR (Oxprenolol[MeSH] OR "Oxprenolol") OR ("parathyroid hormone-related protein 1-34 "[Supplementary Concept] OR "parathyroid hormone-related protein 1-34 ") OR (Pargyline[MeSH] OR "Pargyline") OR (Pempidine[MeSH] OR "Pempidine") OR (Penbutolol[MeSH] OR "Penbutolol") OR (Pentolinium Tartrate[MeSH] OR "Pentolinium Tartrate") OR (Perindopril[MeSH] OR "Perindopril") OR (Phenoxybenzamine[MeSH] OR "Phenoxybenzamine") OR (Phentolamine[MeSH] OR "Phentolamine") OR (Pinacidil[MeSH] OR "Pinacidil") OR (Pindolol[MeSH] OR "Pindolol") OR (Piperoxan[MeSH] OR "Piperoxan") OR (Polythiazide[MeSH] OR "Polythiazide") OR (Prazosin[MeSH] OR "Prazosin") OR (Propranolol[MeSH] OR "Propranolol") OR (Protoveratrine[MeSH] OR "Protoveratrine") OR "Protoveratrine") OR (quinapril[Supplementary Concept] OR "quinapril")</p> |
| 30 | <p>(Ramipril[MeSH] OR "Ramipril") OR (remikiren[Supplementary Concept] OR "remikiren") OR (rentiapril[Supplementary Concept] OR "rentiapril") OR (Reserpine[MeSH] OR "Reserpine") OR (rilmenidine[Supplementary Concept] OR "rilmenidine") OR (ryodipine[Supplementary Concept] OR "ryodipine") OR (Saralasin[MeSH] OR "Saralasin") OR (scoparone[Supplementary Concept] OR "scoparone") OR (sesamin[Supplementary Concept] OR "sesamin") OR (talinalol[Supplementary Concept] OR "talinalol") OR (temocapril hydrochloride[Supplementary Concept] OR "temocapril hydrochloride") OR (Teprotide[MeSH] OR "Teprotide") OR (terlipressin[Supplementary Concept] OR "terlipressin") OR (tetrahydropalmatine[Supplementary Concept] OR "tetrahydropalmatine") OR (tibolone[Supplementary Concept] OR "tibolone") OR (Ticrynafen[MeSH] OR "Ticrynafen") OR</p>                                                                                                                                                                                                                                                                                                                                                                                                                                                                                                                                                                                                                                                                                                                                                                                                                                                                                                                                                                                                                                                                                                                                                                                                                                                                                                                                                                                                                                                                                                                                                                                                                                                                                                                              |

|    |                                                                                                                                                                                                                                                                                                                                                                                                                                                                                                                                                                                                                                                                                                                                                                                                                                                                                                                                                                                                                                                                                                                                                                                                                                                                                                                                                                                                                                                                                                                                             |
|----|---------------------------------------------------------------------------------------------------------------------------------------------------------------------------------------------------------------------------------------------------------------------------------------------------------------------------------------------------------------------------------------------------------------------------------------------------------------------------------------------------------------------------------------------------------------------------------------------------------------------------------------------------------------------------------------------------------------------------------------------------------------------------------------------------------------------------------------------------------------------------------------------------------------------------------------------------------------------------------------------------------------------------------------------------------------------------------------------------------------------------------------------------------------------------------------------------------------------------------------------------------------------------------------------------------------------------------------------------------------------------------------------------------------------------------------------------------------------------------------------------------------------------------------------|
|    | (Timolol[MeSH] OR "Timolol") OR (tobanum[Supplementary Concept] OR "tobanum") OR (tocopherylquinone[Supplementary Concept] OR "tocopherylquinone") OR (Todralazine[MeSH] OR "Todralazine") OR (Tolazoline[MeSH] OR "Tolazoline") OR (torsemide[Supplementary Concept] OR "torsemide") OR (trandolapril[Supplementary Concept] OR "trandolapril") OR (travoprost[Supplementary Concept] OR "travoprost") OR (treprostinil[Supplementary Concept] OR "treprostinil") OR (Trichlormethiazide[MeSH] OR "Trichlormethiazide") OR (trimazosin[Supplementary Concept] OR "trimazosin") OR (Trimethaphan[MeSH] OR "Trimethaphan") OR (urapidil[Supplementary Concept] OR "urapidil") OR (valsartan[Supplementary Concept] OR "valsartan") OR (Veratrum Alkaloids[MeSH] OR "Veratrum Alkaloids" OR "Veratrum Alkaloid") OR (Vincamine[MeSH] OR "Vincamine") OR (viprostol[Supplementary Concept] OR "viprostol") OR (Xipamide[MeSH] OR "Xipamide") OR (Y 26763[Supplementary Concept] OR "Y 26763") OR (Y 27632[Supplementary Concept] OR "Y 27632") OR (zofenopril[Supplementary Concept] OR "zofenopril") OR (azepexole[Supplementary Concept] OR "azepexole") OR (Celiprolol[MeSH Term] OR "Celiprolol") OR (cicletanine[Supplementary Concept] OR "cicletanine") OR (fosinoprilat[Supplementary Concept] OR "fosinoprilat") OR (nebivolol[Supplementary Concept] OR "nebivolol") OR (nipradilol[Supplementary Concept] OR "nipradilol")                                                                                                          |
| 31 | 25 OR 26 OR 27 OR 28 OR 29 OR 30                                                                                                                                                                                                                                                                                                                                                                                                                                                                                                                                                                                                                                                                                                                                                                                                                                                                                                                                                                                                                                                                                                                                                                                                                                                                                                                                                                                                                                                                                                            |
| 32 | (aliskiren [Supplementary Concept] OR "aliskiren") OR Angiotensin II Type 1 Receptor Blockers[MeSH] OR Angiotensin Receptor Antagonists [Pharmacological Action] OR ("Angiotensin Receptor Blockers" OR "Angiotensin Receptor Blocker") OR ("Angiotensin II Receptor Antagonists" OR "Angiotensin II Receptor Antagonist") OR ("Angiotensin II Receptor Blockers" OR "Angiotensin II Receptor Blocker") OR 1-Sarcosine-8-Isoleucine Angiotensin II [MeSH Term] OR (A 81988[Supplementary Concept] OR "A 81988") OR (Abbott 81282[Supplementary Concept] OR "Abbott 81282") OR (candesartan[Supplementary Concept] OR "candesartan") OR (candesartan cilexetil[Supplementary Concept] OR "candesartan cilexetil") OR (eprosartan[Supplementary Concept] OR "eprosartan") OR (irbesartan[Supplementary Concept] OR "irbesartan") OR (Losartan[MeSH Term] OR "Losartan") OR (olmesartan[Supplementary Concept] OR "olmesartan") OR (olmesartan medoxomil[Supplementary Concept] OR "olmesartan medoxomil") OR (PD 123319[Supplementary Concept] OR "PD 123319") OR (sapisartan potassium[Supplementary Concept] OR "sapisartan potassium") OR (Saralasin[MeSH Term] OR "Saralasin") OR (tasosartan[Supplementary Concept] OR "tasosartan") OR (telmisartan[Supplementary Concept] OR "telmisartan") OR (telmisartan, hydrochlorothiazide drug combination[Supplementary Concept] OR "telmisartan, hydrochlorothiazide drug combination") OR (valsartan[Supplementary Concept] OR "valsartan") OR (ZD 7155[Supplementary Concept] OR "ZD 7155") |
| 33 | 1 OR 4 OR 7 OR 11 OR 12 OR 18 OR 21 OR 24 OR 31 OR 32                                                                                                                                                                                                                                                                                                                                                                                                                                                                                                                                                                                                                                                                                                                                                                                                                                                                                                                                                                                                                                                                                                                                                                                                                                                                                                                                                                                                                                                                                       |
| 34 | Sleep Apnea Syndromes[MeSH] OR (Sleep[MeSH] AND Apnea[MeSH]) OR Sleep Apnea, Central[MeSH] OR Sleep Apnea, Obstructive[MeSH] OR Obesity Hypoventilation Syndrome[MeSH]                                                                                                                                                                                                                                                                                                                                                                                                                                                                                                                                                                                                                                                                                                                                                                                                                                                                                                                                                                                                                                                                                                                                                                                                                                                                                                                                                                      |
| 35 | "Sleep-Disordered Breathing" OR "Central Alveolar Hypoventilation" OR "Central Apnea" OR "Central Apneas" OR "Central Sleep Apnea" OR "Central Sleep Apnea Syndrome" OR "Central Sleep Apneas" OR "Central Sleep Disordered Breathing" OR "Central Sleep-Disordered Breathing" OR "Central Sleep-Disordered Breathings" OR "Hypersomnia with Periodic Respiration" OR "Hypopnea, Sleep" OR "Mixed Central and Obstructive Sleep Apnea" OR "Mixed Sleep Apnea" OR "Mixed Sleep Apneas" OR "Ondine Syndrome" OR "Sleep Apnea" OR "Sleep Apnea Syndrome" OR "Sleep Apneas" OR "Sleep Disordered Breathing" OR "Sleep Hypopnea" OR "Sleep Hypopneas"                                                                                                                                                                                                                                                                                                                                                                                                                                                                                                                                                                                                                                                                                                                                                                                                                                                                                            |
| 36 | ("mixed" OR "central" OR "obstructive") AND "sleep"                                                                                                                                                                                                                                                                                                                                                                                                                                                                                                                                                                                                                                                                                                                                                                                                                                                                                                                                                                                                                                                                                                                                                                                                                                                                                                                                                                                                                                                                                         |
| 37 | "sa" OR "osa" OR "osas" OR "ahi" OR "sas" OR "sahs" OR "srbd"                                                                                                                                                                                                                                                                                                                                                                                                                                                                                                                                                                                                                                                                                                                                                                                                                                                                                                                                                                                                                                                                                                                                                                                                                                                                                                                                                                                                                                                                               |
| 38 | "sleep" OR "hypersomnia"                                                                                                                                                                                                                                                                                                                                                                                                                                                                                                                                                                                                                                                                                                                                                                                                                                                                                                                                                                                                                                                                                                                                                                                                                                                                                                                                                                                                                                                                                                                    |
| 39 | 36 OR 37 OR 38                                                                                                                                                                                                                                                                                                                                                                                                                                                                                                                                                                                                                                                                                                                                                                                                                                                                                                                                                                                                                                                                                                                                                                                                                                                                                                                                                                                                                                                                                                                              |
| 40 | ("apnea" OR "apneas") OR ("apnaea" OR "apnaeas") OR ("apnoe" OR "apnoes") OR ("apnoea" OR "apnoeas")                                                                                                                                                                                                                                                                                                                                                                                                                                                                                                                                                                                                                                                                                                                                                                                                                                                                                                                                                                                                                                                                                                                                                                                                                                                                                                                                                                                                                                        |
| 41 | ("hypopnea" OR "hypopneas") OR ("hypopnaea" OR "hypopnaeas") OR ("hypopnoe" OR "hypopnoes") OR ("hypopnoea" OR "hypopnoeas")                                                                                                                                                                                                                                                                                                                                                                                                                                                                                                                                                                                                                                                                                                                                                                                                                                                                                                                                                                                                                                                                                                                                                                                                                                                                                                                                                                                                                |
| 42 | ("apnea-hypopnea" OR "apnea/hypopnea") OR ("apnaea-hypopnaea" OR "apnaea/hypopnaea") OR ("apnoe-hypopnoe" OR "apnoe/hypopnoe") OR ("apnoea-hypopnoea" OR "apnoea/hypopnoea") OR "respiratory disturbance"                                                                                                                                                                                                                                                                                                                                                                                                                                                                                                                                                                                                                                                                                                                                                                                                                                                                                                                                                                                                                                                                                                                                                                                                                                                                                                                                   |



|    |                                                                                                                                                                     |
|----|---------------------------------------------------------------------------------------------------------------------------------------------------------------------|
| 43 | "hypoxia" OR "hypoxemia" OR "hypoxaemia" OR "repetitive hypoxemia" OR "repetitive hypoxaemia" OR "periodic respiration" OR "respiratory disturbance" OR "breathing" |
| 44 | 40 OR 41 OR 42 OR 43                                                                                                                                                |
| 45 | 39 AND 44                                                                                                                                                           |
| 46 | 34 OR 35 OR 45                                                                                                                                                      |
| 47 | 33 AND 46                                                                                                                                                           |
